# Supplementary material for: Prickly waterlily and rigid hornwort genomes shed light on early angiosperm evolution
Source: PubMed Central journal article supplement (PMC8075997; doi:10.1038/s41477-020-0594-6), 2020-02-24
Supplement: 41477_2020_594_MOESM1_ESM.pdf [file 41477_2020_594_MOESM1_ESM.pdf]

In the format provided by the authors and unedited.

# Prickly waterlily and rigid hornwort genomes shed light on early angiosperm evolution

Yongzhi Yang<sup>1,2,7</sup>, Pengchuan Sun<sup>3,7</sup>, Leke Lv<sup>1</sup>, Donglei Wang<sup>1</sup>, Dafu Ru<sup>1</sup>, Ying Li<sup>2</sup>, Tao Ma<sup>1</sup>, Lei Zhang<sup>1</sup>, Xingxing Shen<sup>4</sup>, Fanbo Meng<sup>3</sup>, Beibei Jiao<sup>3</sup>, Lanxing Shan<sup>3</sup>, Man Liu<sup>3</sup>, Qingfeng Wang<sup>5</sup>, Zhiji Qin<sup>3</sup>, Zhenxiang Xi<sup>1</sup>✉, Xiyin Wang<sup>3</sup>✉, Charles C. Davis<sup>6</sup>✉ and Jianquan Liu<sup>1,2</sup>✉

<sup>1</sup>Key Laboratory of Bio-Resource and Eco-Environment of Ministry of Education & State Key Laboratory of Hydraulics & Mountain River Engineering, College of Life Sciences, Sichuan University, Chengdu, China. <sup>2</sup>State Key Laboratory of Grassland Agro-Ecosystem, Institute of Innovation Ecology, Lanzhou University, Lanzhou, China. <sup>3</sup>School of Life Sciences, North China University of Science and Technology, Tangshan, China. <sup>4</sup>Institute of Insect Sciences, College of Agriculture and Biotechnology, Zhejiang University, Hangzhou, China. <sup>5</sup>Key Laboratory of Aquatic Botany and Watershed Ecology, Wuhan Botanical Garden, Chinese Academy of Sciences, Wuhan, China. <sup>6</sup>Department of Organismic and Evolutionary Biology, Harvard University Herbaria, Cambridge, MA, USA. <sup>7</sup>These authors contributed equally: Yongzhi Yang, Pengchuan Sun. ✉e-mail: [zxi@scu.edu.cn](mailto:zxi@scu.edu.cn); [wangxiyin@vip.sina.com](mailto:wangxiyin@vip.sina.com); [cdavis@oeb.harvard.edu](mailto:cdavis@oeb.harvard.edu); [liujq@nwipb.ac.cn](mailto:liujq@nwipb.ac.cn)

1 **Supplementary Information**

2

3

4 **Prickly waterlily and rigid hornwort genomes shed light on early**  
5 **angiosperm evolution**

6

7 Yang and Ma et al.

8

9

10

11

12

13

14 **Supplementary Notes ..... 2**

15 **Supplementary Figures ..... 6**

16 **Supplementary Tables..... 36**

17 **Supplementary References ..... 75**

18

19

## 20 **Supplementary Notes**

### 21 **Supplementary Note 1**

22 For the gene family evolution analysis, a total of 316,967 genes from 14 species (12  
23 angiosperms and 2 gymnosperms) were clustered into 28,710 gene families with an  
24 average of eleven genes per family (Supplementary Table 9). In addition, we found  
25 that 78.3% and 71.2% of all predicted protein-coding genes were clustered into gene  
26 families for *Euryale* and *Ceratophyllum*, respectively. A total of 1,139 unique gene  
27 families in *Euryale* were enriched in 76 GO categories, and their main functions were  
28 involved in response to stimulus, cellular metabolism, and macromolecule metabolism  
29 (Supplementary Table 16). A total of 1,016 unique gene families in *Ceratophyllum*  
30 were enriched in 78 GO categories, and their main functions were involved in defense  
31 response and cell wall modification (Supplementary Table 17). Using CAFÉ<sup>1</sup>, we  
32 identified 6,501 and 3,473 expanded gene families, and 5,927 and 5,024 contraction  
33 gene families for *Euryale* and *Ceratophyllum*, respectively. We found that the  
34 expanded gene families in *Euryale* were mainly associated with defense responding,  
35 especially for the light and cell wall modification (Supplementary Table 18). For  
36 *Ceratophyllum*, however, the expanded gene families were mainly involved in  
37 transcription and primary metabolic process (Supplementary Table 19). The  
38 contracted gene families within these two species were mainly involved in the  
39 membrane component, hydrolase activity, and extracellular matrix related processes  
40 (Supplementary Tables 20 and 21). The unique and expanded gene families related to  
41 stimulus and regulation of transcription may have helped these two species adapt the  
42 new specialized aquatic environment when recolonizing the aquatic habitat after their  
43 ancestors had dwelled in the land for a long time. Especially, some cell-wall related  
44 gene families also experienced the rapid contractions (Supplementary Tables 20 and

45 21), which may explain the vascular cambium changes in these two aquatic lineages.  
46 Further studies are needed to confirm whether genomic changes may account for  
47 phenotypic and habitat changes of these two aquatic lineages.

48

## 49 **Supplementary Note 2**

50 For each gene tree, the bootstrap support for the internal branch in the data set SSCG-  
51 CDS were significantly greater than those in the data set SSCG-Codon12 (T-test,  
52  $P < 0.01$ ) (Supplementary Fig. 11a,b), suggesting a higher resolution for the SSCG-  
53 CDS data set. In addition, we found a positive correlation between the branch length  
54 and bootstrap support (Spearman  $P < 0.01$ ) (Supplementary Fig. 11c). Furthermore,  
55 we conducted a test of the null hypothesis that a short internal branch in the estimated  
56 species tree should be replaced by a polytomy<sup>2</sup>. Here, three internal branches were  
57 selected, i.e., branch A involving *Amborella* and *Euryale*, branch B involving  
58 monocots, magnoliids, Ceratophyllales, and eudicots, and branch C involving  
59 Magnoliids, Ceratophyllales, and eudicots (Supplementary Fig. 14a). We performed  
60 the test<sup>2</sup> using ASTRAL ('-t 10'), and randomly selected 50, 100, 150, ..., and 1,300  
61 gene trees. Each random sampling was repeated 20 times. We found that the null  
62 hypothesis was rejected for all three short internal branches in our species tree as the  
63 number of sampled genes in the SSCG-CDS data set increased to 400 (Supplementary  
64 Fig. 14). Finally, our SSCG and OSCG data sets consist of 1,374 and 2,302 single-  
65 copy genes, respectively. In contrast, fewer single-copy genes were phylogenetically  
66 analyzed in these recently published genome papers (i.e., 211, 235, 176, and 82 genes  
67 in the genome paper of *Cinnamomum*<sup>3</sup>, *Liriodendron*<sup>4</sup>, *Persea*<sup>5</sup>, and *Piper*<sup>6</sup>,  
68 respectively).

69

70 **Supplementary Note 3**

71 The major incongruence between nuclear and plastid phylogenies involves the  
72 placement of magnoliids. In the plastome phylogeny, magnoliids were placed as the  
73 basal lineage in Mesangiospermae (Supplementary Fig. 20). For nuclear genes,  
74 however, magnoliids were placed as sister to Ceratophyllales + eudicots  
75 (Supplementary Figs. 12–13, 15–16, 24–26). We first used PhyloNetworks<sup>7</sup> to detect  
76 all possible hybridization events in Mesangiospermae by allowing the number of  
77 hybridization events from one to ten. Only three potential hybridization events were  
78 detected: one between the core eudicots and monocots, one within eudicots, and one  
79 within monocots (Supplementary Fig. 21).

80 We used a simulation method<sup>8</sup> to explore whether such incongruence can be  
81 explained by incomplete lineage sorting (ILS). A total of 20,000 gene trees were  
82 simulated under the multispecies coalescent model based on our ASTRAL species  
83 tree. Gene tree quartet frequencies were calculated for simulated and empirical data  
84 sets, and we found a significant correlation between simulated and empirical gene  
85 trees ( $r^2 = 0.97$ ,  $P < 0.01$ ; Spearman's rho) (Supplementary Fig. 23a,b). We also found  
86 that the topology of the plastome phylogeny showed a similar frequency between  
87 simulated and empirical data sets (Supplementary Fig. 23c,d). These results support  
88 that ILS may well account for the incongruence identified here.

89 Using PSMC analyses, we additionally tested whether early angiosperms shared  
90 similar demographic histories in response to the recent climatic oscillations. All  
91 species examined here showed decreased effective population sizes during the  
92 Quaternary glaciation, and retained small effective population sizes without the  
93 occurrence of post-glacial expansion (Supplementary Fig. 28 and Supplementary  
94 Table 22). It remains unclear whether this is common for all early-diverging

95 angiosperms.

96       Furthermore, we found that multiple polyploidizations occurred within each of  
97 these early-diverging lineages (Supplementary Fig. 28). Polyploidy is often linked  
98 with key innovations and subsequent species diversification in major clades of  
99 angiosperms<sup>9</sup>. In addition, polyploid plants may have a higher adaptability and  
100 increased tolerance to different environmental conditions<sup>10,11</sup>. Thus, a broader  
101 phylogenetic sampling is required to better understand the evolutionary significance  
102 of polyploidy in species-poor lineages of early angiosperms<sup>12</sup>.

103

104 **Supplementary Figures**

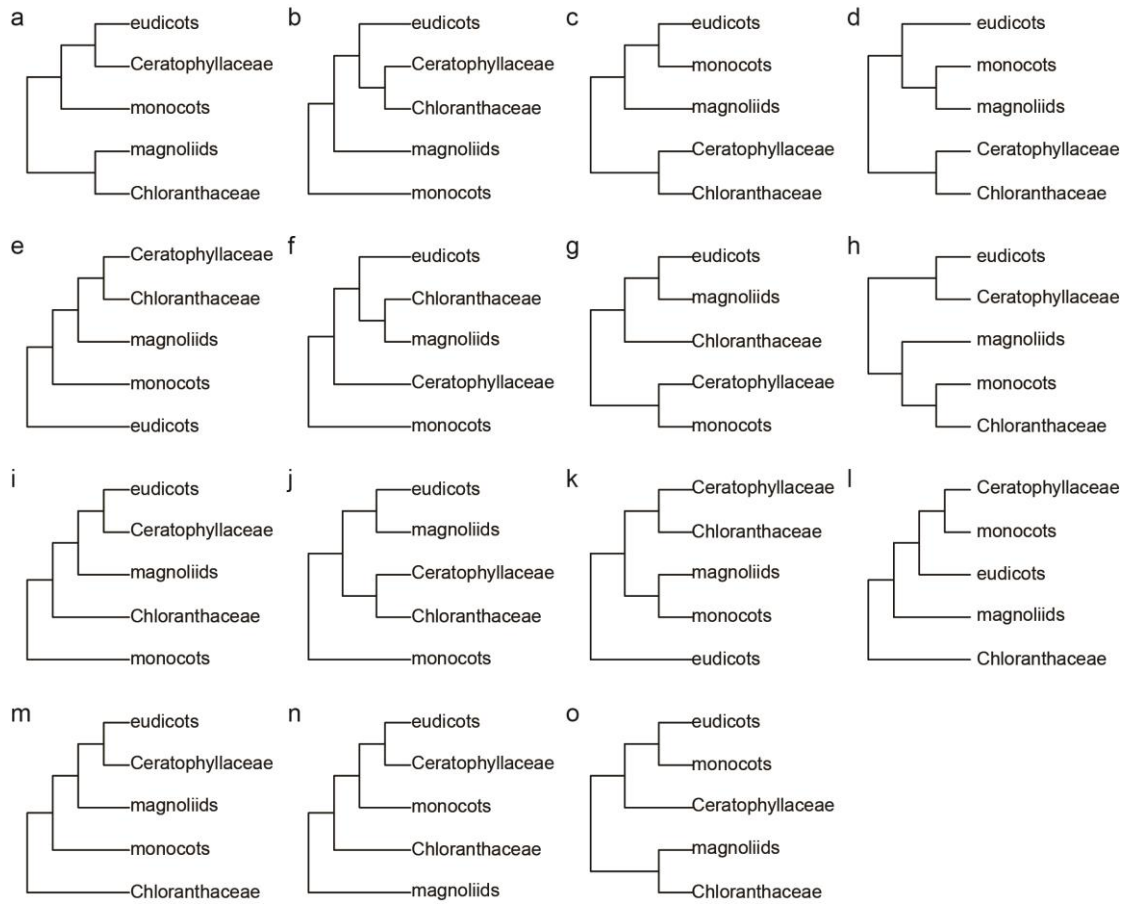

105

106 **Supplementary Figure 1. The previously estimated alternative topologies within**

107 **angiosperms.** (a) refs 13-15; (b) ref 16; (c) ref 17; (d) ref 18; (e) ref 19; (f) ref 20; (g) refs 21-23;

108 (h) refs 21,24; (i) ref 21; (j) ref 21; (k) ref 21; (l) refs 15,21; (m) ref 25; (n) ref 14; (o) ref 26.

109

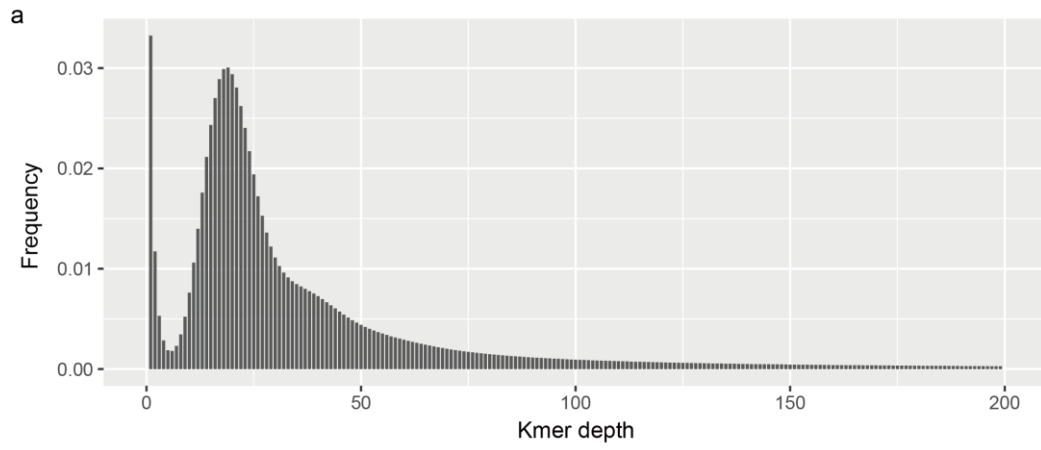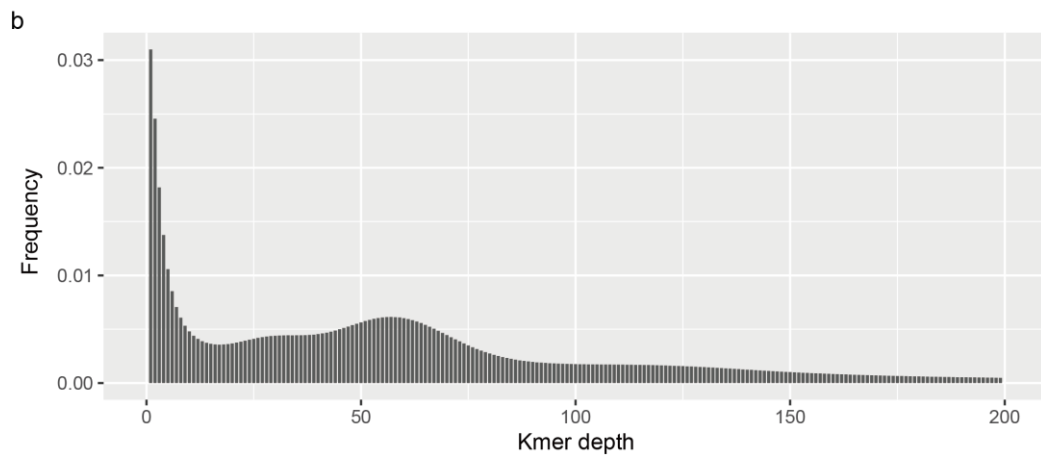

110

111 **Supplementary Figure 2. 17-mer-based analysis to estimate the genome size of prickly**  
112 **waterlily (a) and hornwort (b) respectively.**

113



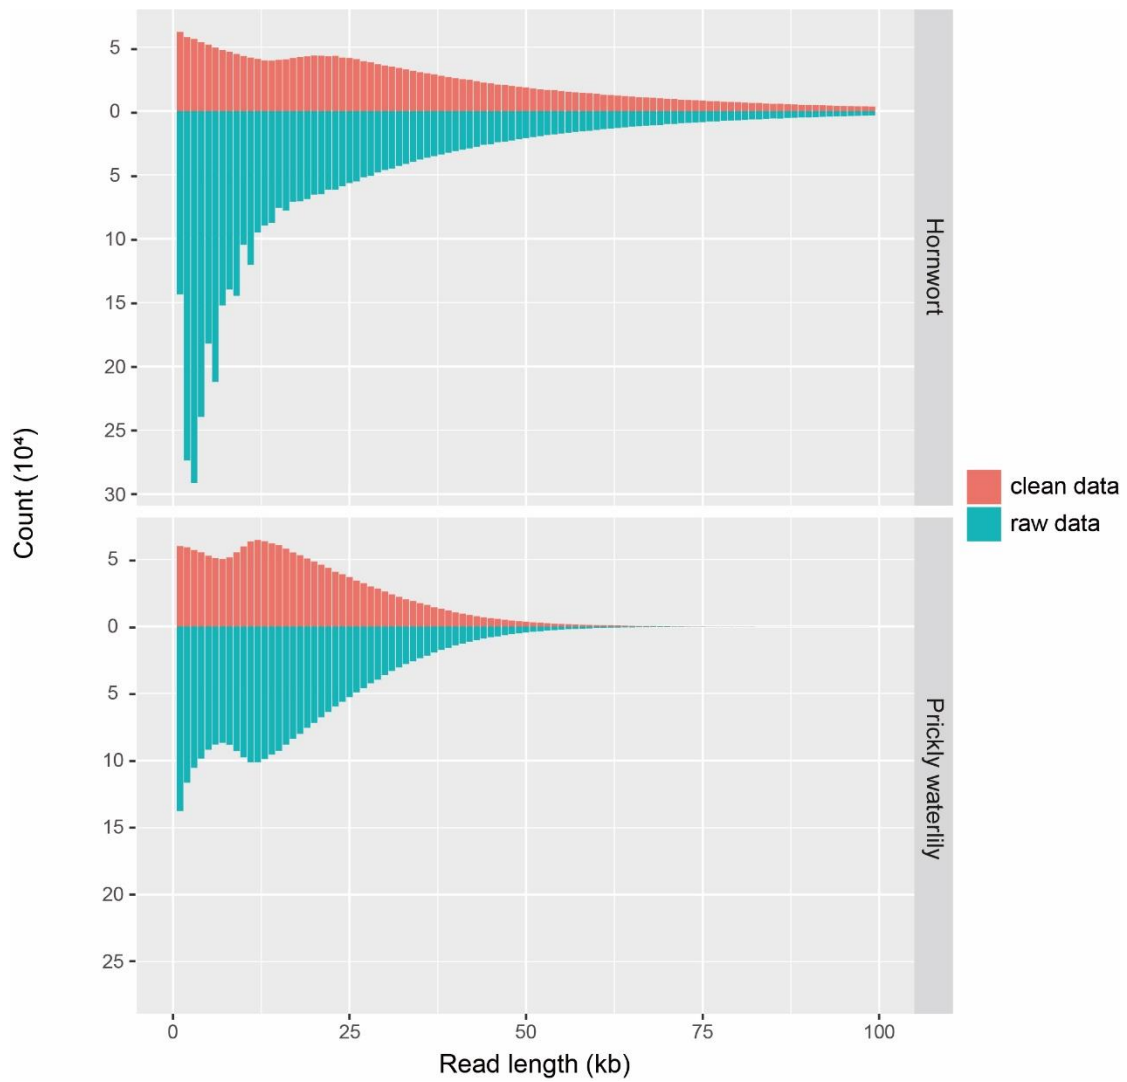

114

115 **Supplementary Figure 3. The length distribution of ONT long reads.** The blue bars represent  
 116 the raw sequencing data and the red bars represent the cleaned data, which removed those reads  
 117 with the mean quality score < 7.

118

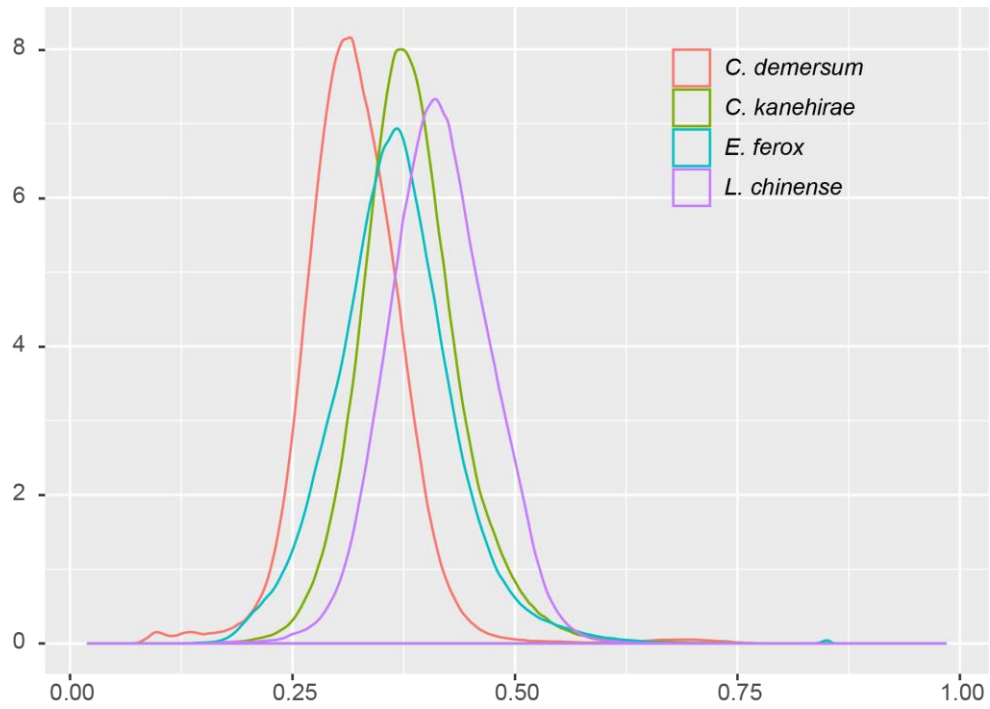

119 **Supplementary Figure 4. The GC content distribution for the two species.** The non-  
120 overlapping window size is 500bp.

121

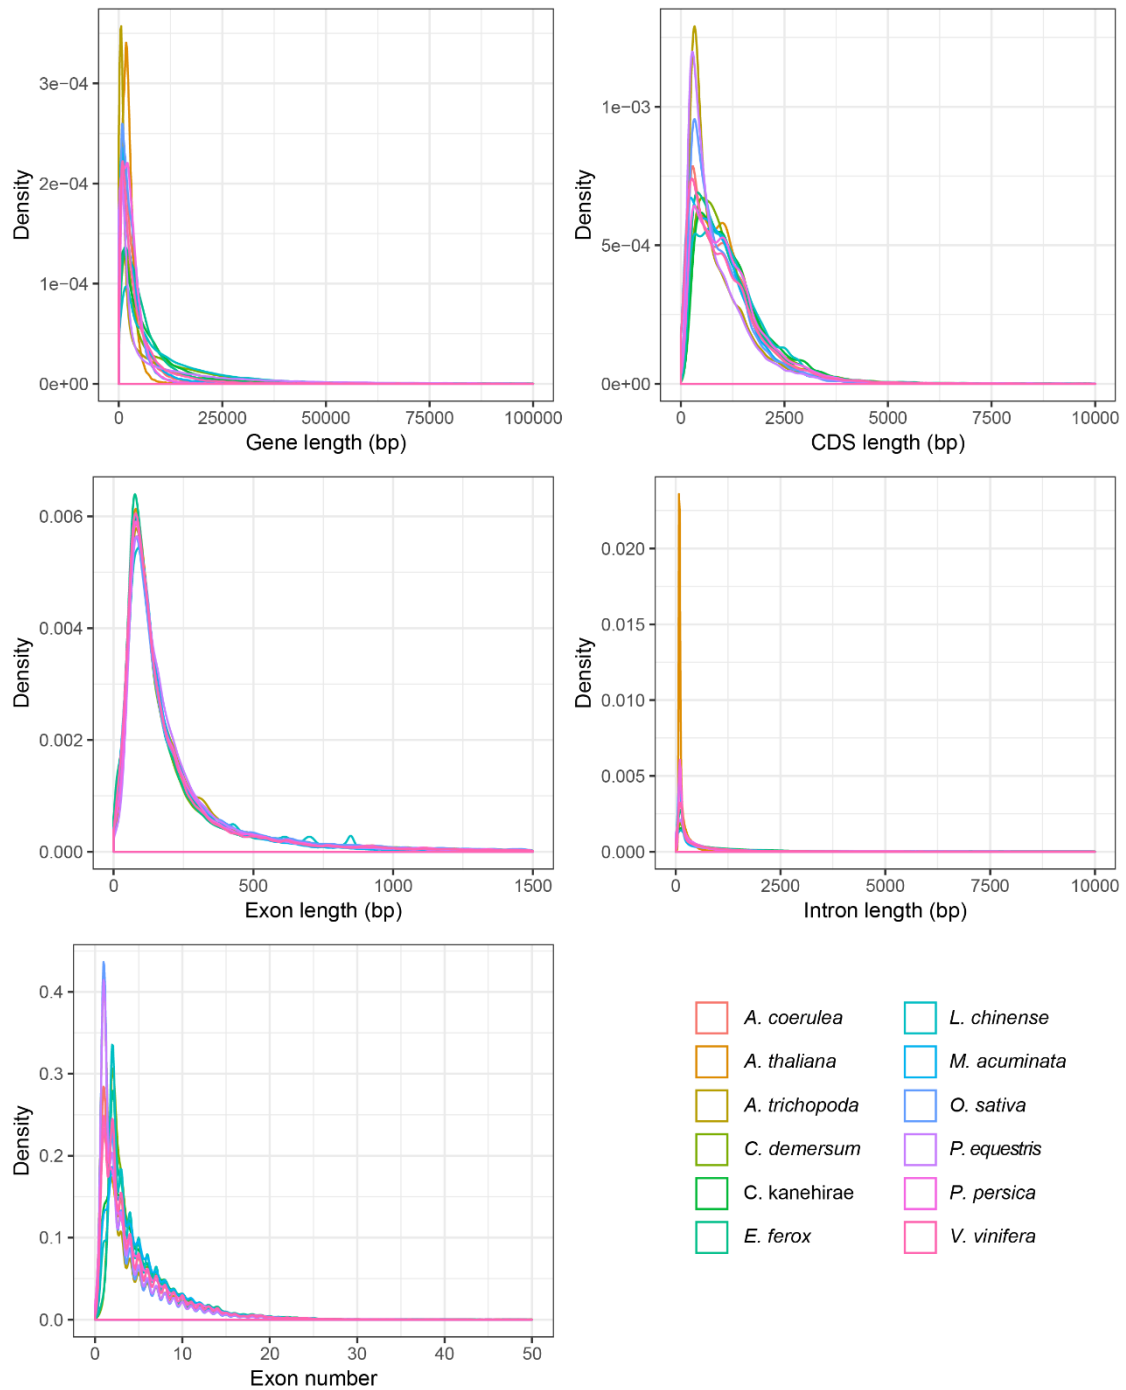

122

123 **Supplementary Figure 5. Comparison of mRNA length (a), CDS length (b), Exon length (c),**

124 **Intron length (d), and Exon number per gene (e) among the 12 angiosperm species. The x-**

125 **axis represents length or number and the y-axis represents the density of genes.**

126

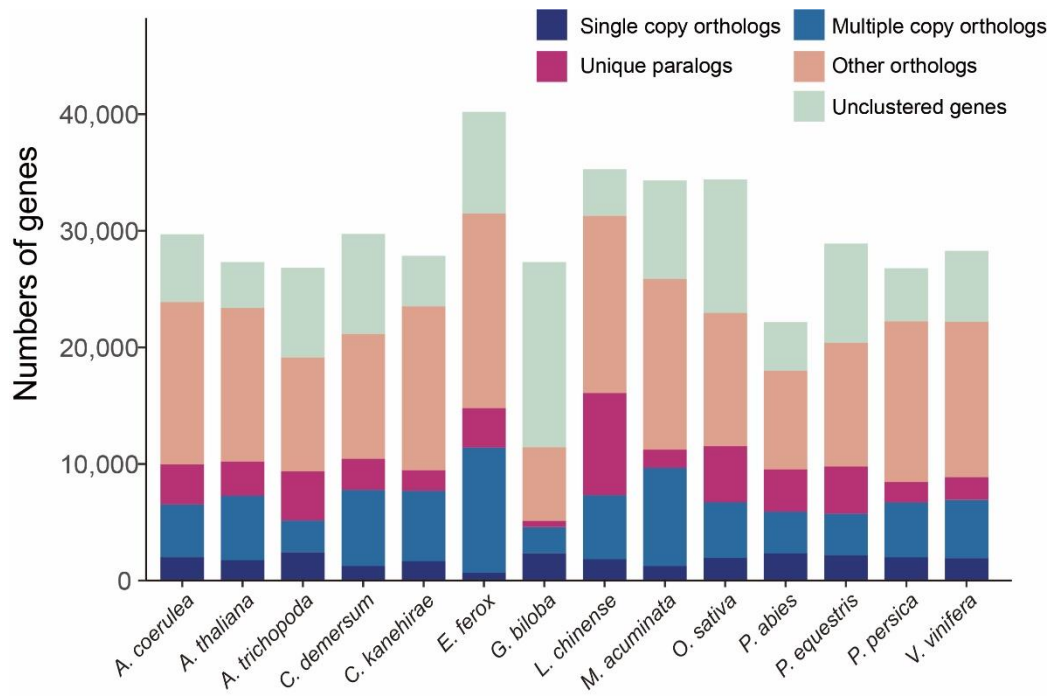

127 **Supplementary Figure 6. The histogram of Gene orthology among 14 species.**

128

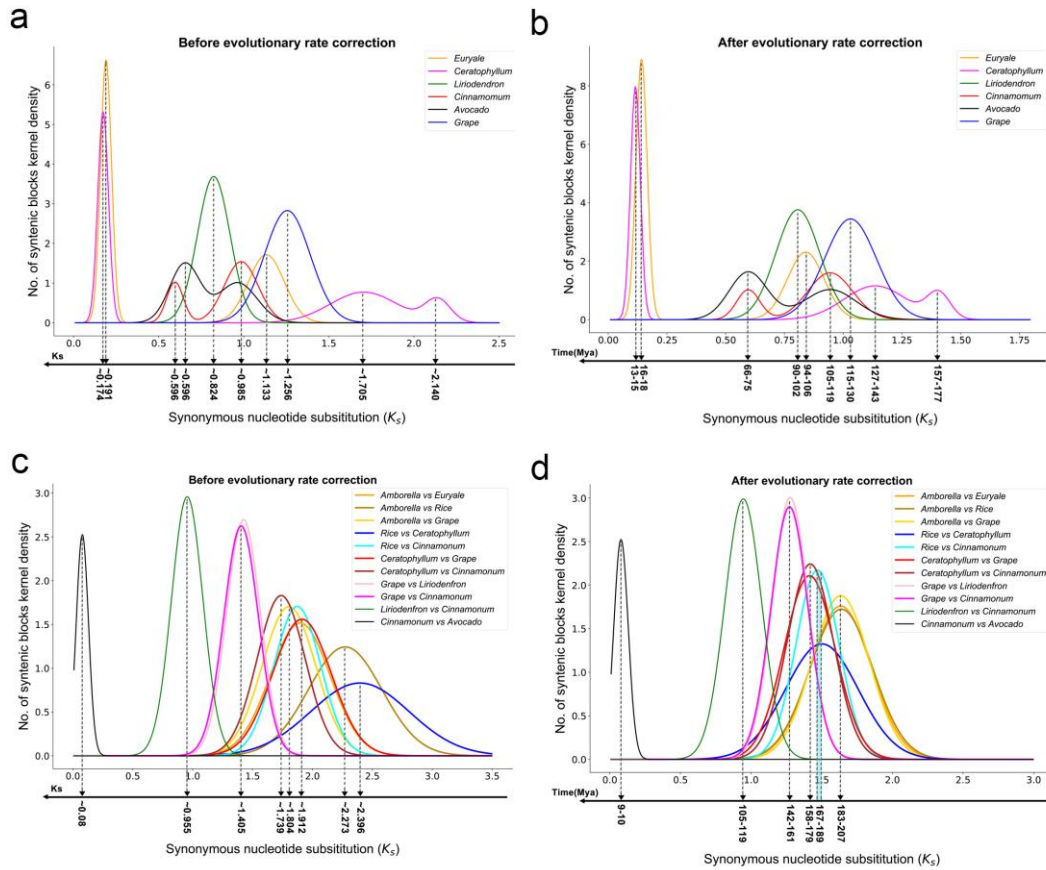

129  
130

131 **Supplementary Figure 7. The distribution of synonymous nucleotide substitutions ( $K_s$ )**  
 132 **between collinear genes.** (a) and (b) were showing the raw and corrected  $K_s$  distribution within  
 133 one species (representing the polyploidization events), respectively. (c) and (d) were showing the  
 134 raw and corrected  $K_s$  distribution between each two species (representing the speciation events).  
 135

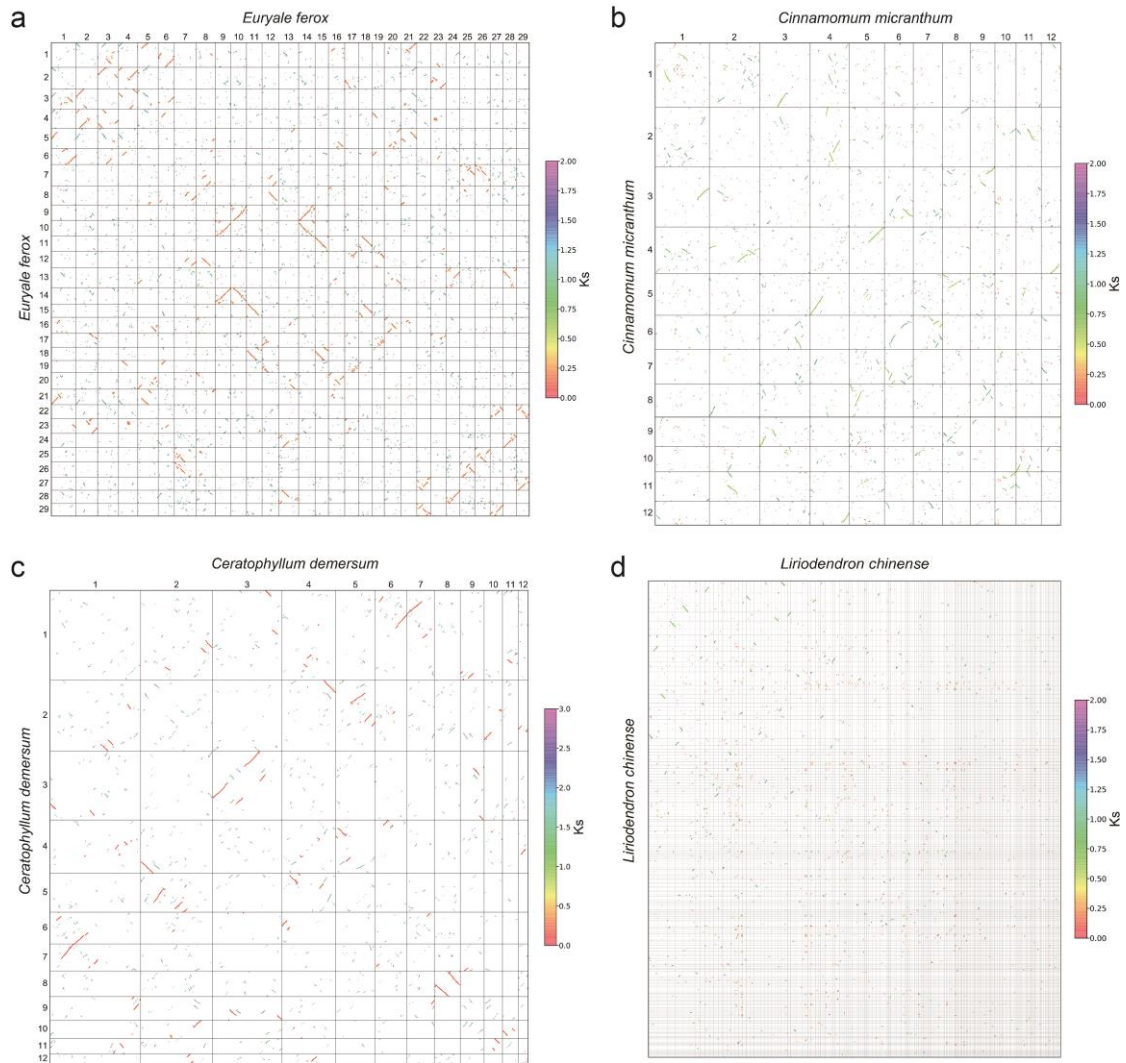

136

137 **Supplementary Figure 8. Syntenic block dotplot within *Euryale*, *Ceratophyllum*, *Liriodendron***  
 138 **and *Cinnamomum*.** All the blocks should contain  $\geq 5$  syntenic gene pairs and the x and y axis  
 139 represent the chromosomes, excepted the *Liriodendron* representing the scaffold and ordered by  
 140 the scaffold's length. The color representing the mean Ks values of each syntenic block.

141

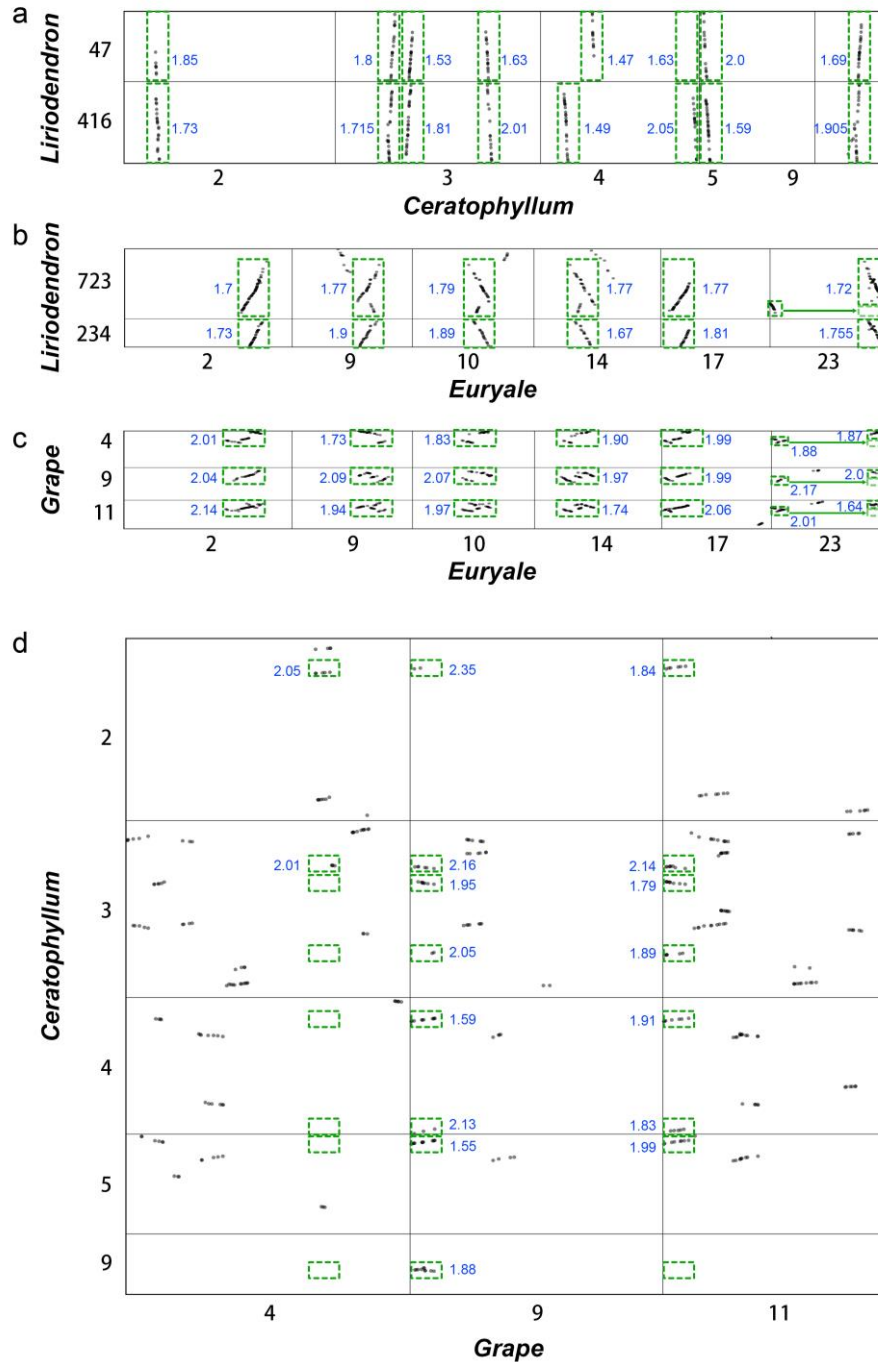

142 **Supplementary Figure 9. Syntenic block dotplot among *Euryale*, *Ceratophyllum*, *Liriodendron***  
 143 **and *Grape*.** All the blocks should contain  $\geq 10$  syntenic gene pairs and the blue number along the  
 144 dashed box representing the mean KS value of the syntenic block. (a) *Liriodendron* – *Ceratophyllum*  
 145 with the syntenic depth ratio of 2:8; (b) *Liriodendron* – *Euryale* with the syntenic depth ratio of 2:6;  
 146 (c) *Grape* – *Euryale* with the syntenic depth ratio of 3:6; (d) *Grape* – *Ceratophyllum* with the  
 147 syntenic depth ratio of 3:8. The empty dashed boxes representing the candidate existing syntenic  
 148 blocks, which may have lost after the polyploidization.

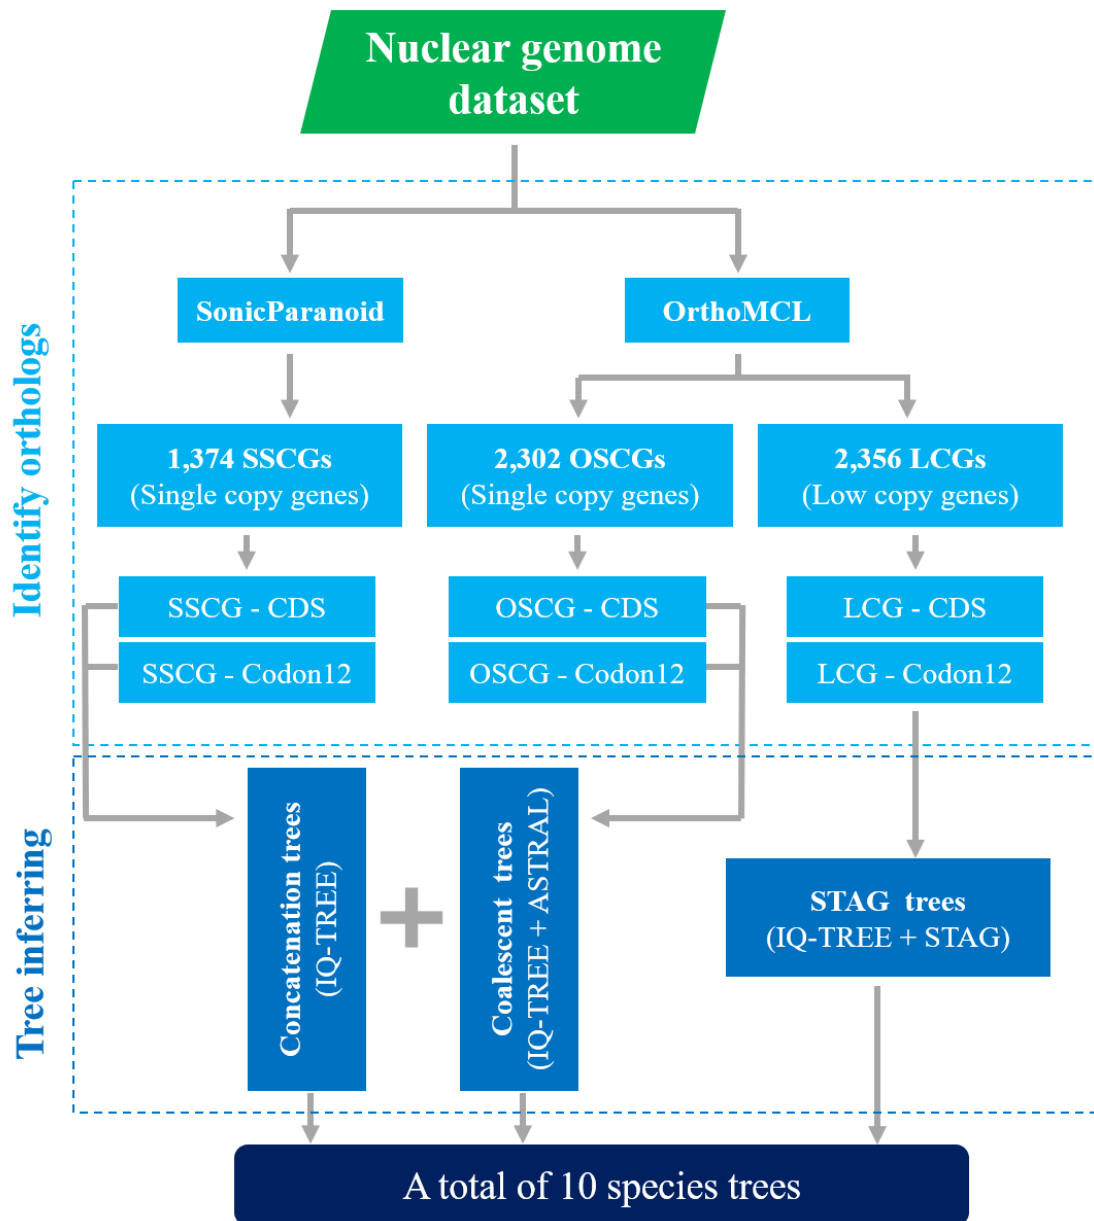

149

150 **Supplementary Figure 10. The phylogeny analysis pipeline.** SSCGs representing the single  
 151 copy genes inferred by the SonicParanoid among the 14 species. OSCGs representing the single  
 152 copy genes inferred by OrthoMCL among the 15 species, and only the SCGs containing more than  
 153 11 species were retained. LCGs representing the low copy gene families among the 15 species,  
 154 and for each species containing less than five sequences.



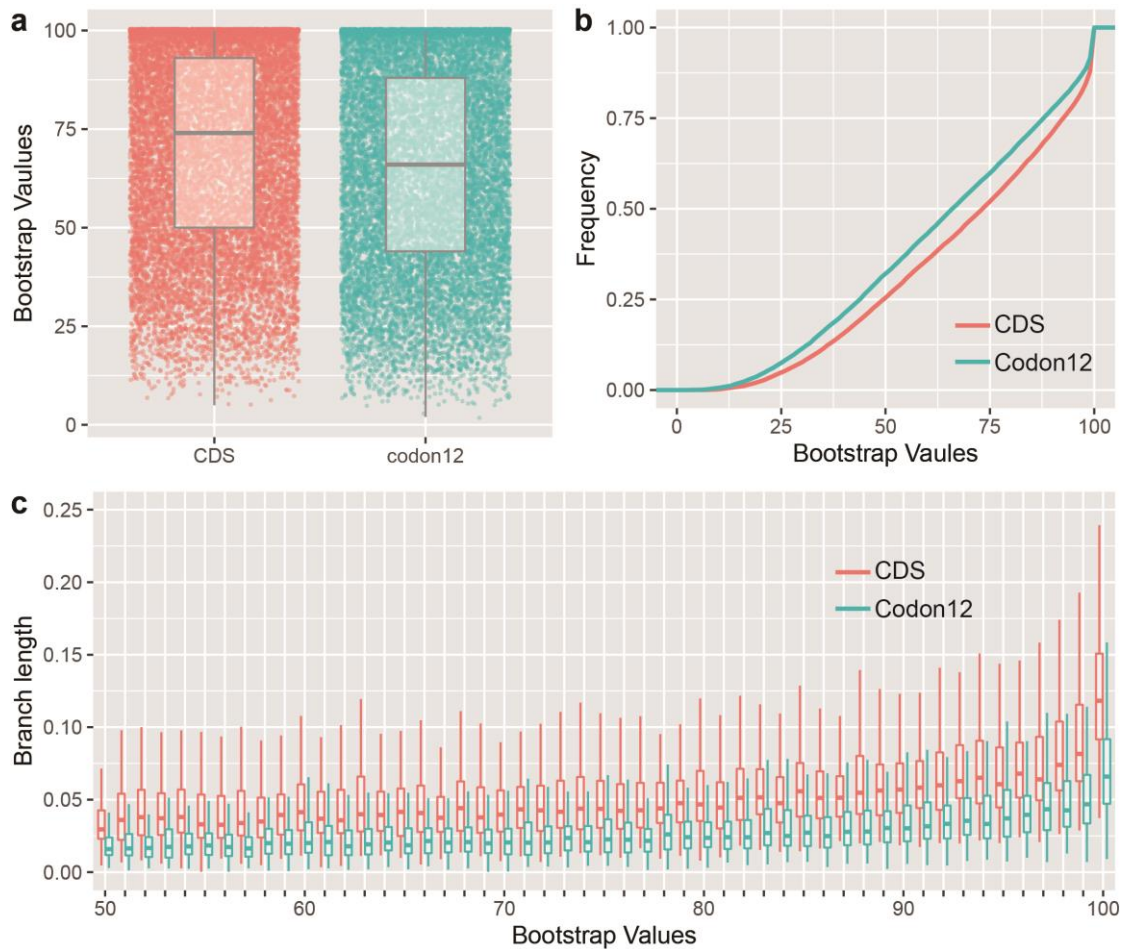

155

156 **Supplementary Figure 11. Bootstrap support (BS) graphed against branch length within the**  
 157 **1,374 raw SSCGs trees.** (a) The BS of each internal branch among the two datasets: CDS and  
 158 Codon12. The paired sample t-test (two tailed,  $n=15,114$  internal branches) were applied to test the  
 159 BS difference between the CDS and Codon12, and a  $P$  value  $< 2.2e-16$  were obtained. (b)  
 160 Cumulative length distribution of the BS of internal branches. A total of 75.5% and 49.1% of the  
 161 branches received a BS values greater than 50% and 75% in SCG-CDS dataset, respectively. A  
 162 total of 68.9% and 41.2% of the branches received a BS values greater than 50% and 75% in  
 163 SCG-CDS dataset, respectively. (c) The distribution of branch length within each bootstrap value  
 164 (from 50 to 100) within the total of 1,374 SSCGs trees from CDS and Codon12 datasets. For each  
 165 box plot the sample size  $n$  = the total number of branches with the corresponding BS values. We  
 166 also found the significant correlation between the bootstrap (only considered the BS values  $\geq 50$ )  
 167 and branch length (SSCG-CDS: Spearman  $P < 0.01$ ; SSCG-Codon12: Spearman  $P < 0.01$ ). For  
 168 the box plot, the line in the center of the box represent the median values, the edges of the box  
 169 represent the first and third quartiles, and the whiskers above and below the box show the range of  
 170 values.

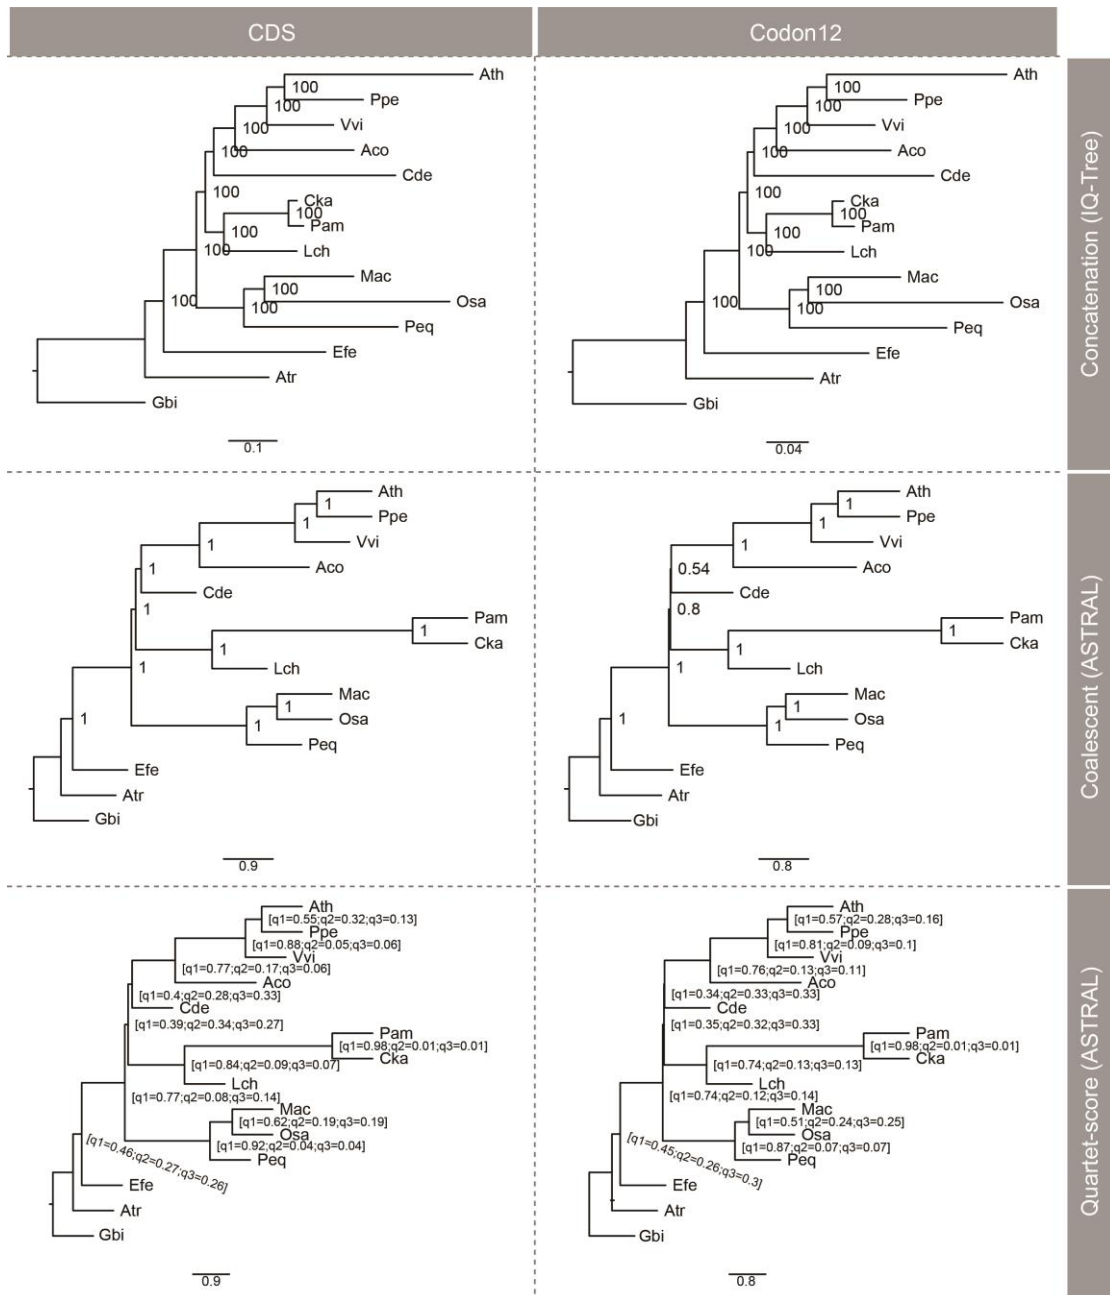

171

172 **Supplementary Figure 12. Phylogenetic relationships inferred with the 1,374 SSCGs. The**

173 corresponding relationship between abbreviations and full names are listing as follow: Aco - *A.*

174 *coerulea*, Ath - *A. thaliana*, Atr - *A. trichopoda*, Cde - *C. demersum*, Cka - *C. kanehirae*, Efe - *E.*

175 *ferox*, Gbi - *G. biloba*, Lch - *L. chinense*, Mac - *M. acuminata*, Osa - *O. sativa*, Pam - *P.*

176 *americana*, Peq - *P. equestris*, Ppe - *P. persica*, Vvi - *V. vinifera*.

177

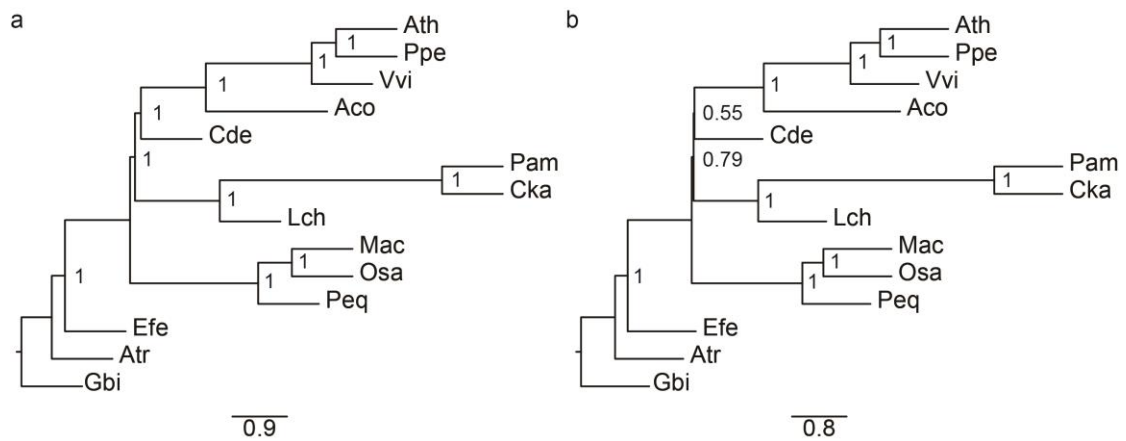

178

179 **Supplementary Figure 13. ASTRAL tree inferred with the 1,374 SSCGs and removed the**

180 **Bootstrap values less than 10. (a) Tree inferred with the SSCG-CDS dataset. (b) Tre inferred**

181 **with the SSCG-Codon12 dataset. The corresponding relationship between abbreviations and full**

182 **names are listing as follow: Aco - *A. coerulea*, Ath - *A. thaliana*, Atr - *A. trichopoda*, Cde - *C.***

183 ***demersum*, Cka - *C. kanehirae*, Efe - *E. ferox*, Gbi - *G. biloba*, Lch - *L. chinense*, Mac - *M.***

184 ***acuminata*, Osa - *O.sativa*, Pam – *P. americana*, Peq - *P. equestris*, Ppe - *P. persica*, Vvi - *V.***

185 ***vinifera*.**

186

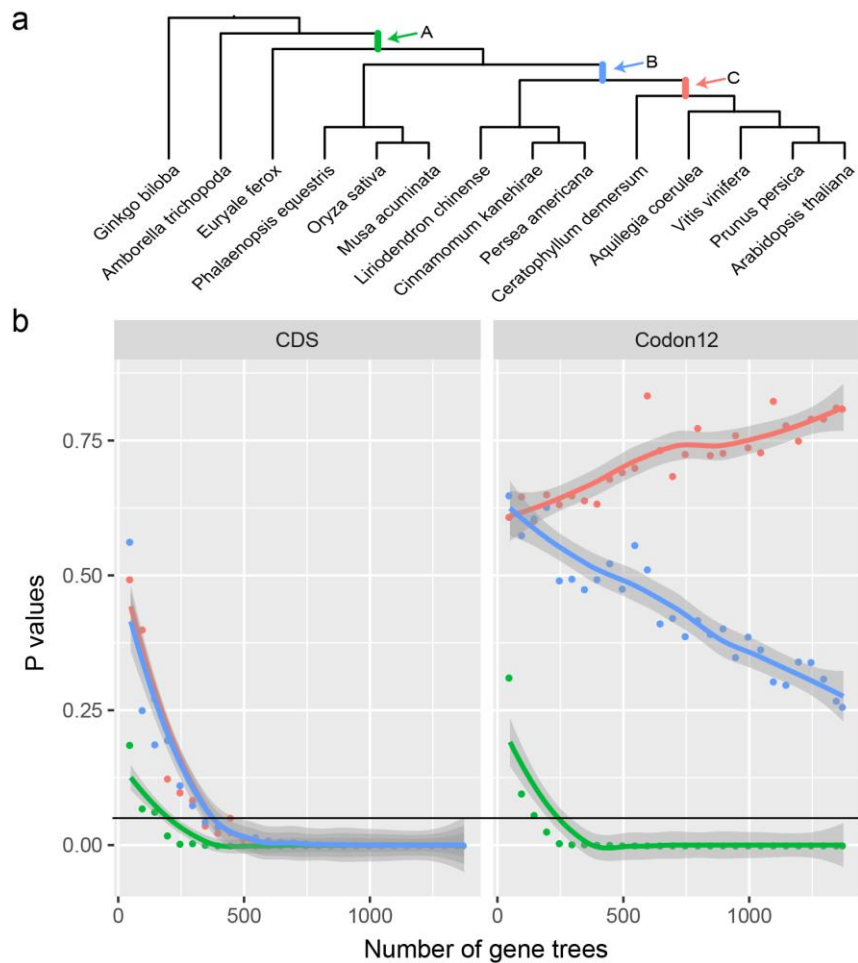

187

188 **Supplementary Figure 14. Polyotomy test results on the three not exactly supported (BS < 100**  
 189 **or PP < 1) branches among the coalescent / concatenation (1,374 SSCGs).** (a) represented the  
 190 topology of the identical nuclear DNA tree and the three branches were marked as green, blue and  
 191 red. (b) represented the changing in *P*-values with respect to the number of genes for the selected  
 192 branches in the corresponding species tree. We used ASTRAL species trees with the varying  
 193 number of gene trees sampled uniformly (50, 100, 150 ... 1,300 SSCG trees), and repeated 20  
 194 times. We show average p-values (y-axis) versus the number of gene trees (y-axis). The null  
 195 hypothesis is that a branch in an estimated species tree should be replaced by a polytomy. The y  
 196 axis represent the *P* values generated by the Chi-square test with the number of gene trees  
 197 supporting the three alternative topologies, and the sample size *n* = the corresponding gene tree  
 198 number at each points. The solid horizontal line shows *P*-value = 0.05. We could find that all the  
 199 three branches were quickly reject the null hypothesis with the number of gene trees adding in the  
 200 SSCG-CDS dataset. While, within SSCG-Codon12 dataset, only A branch could reject the null  
 201 hypothesis, B branch need more number of gene trees and C branch was more complicated.

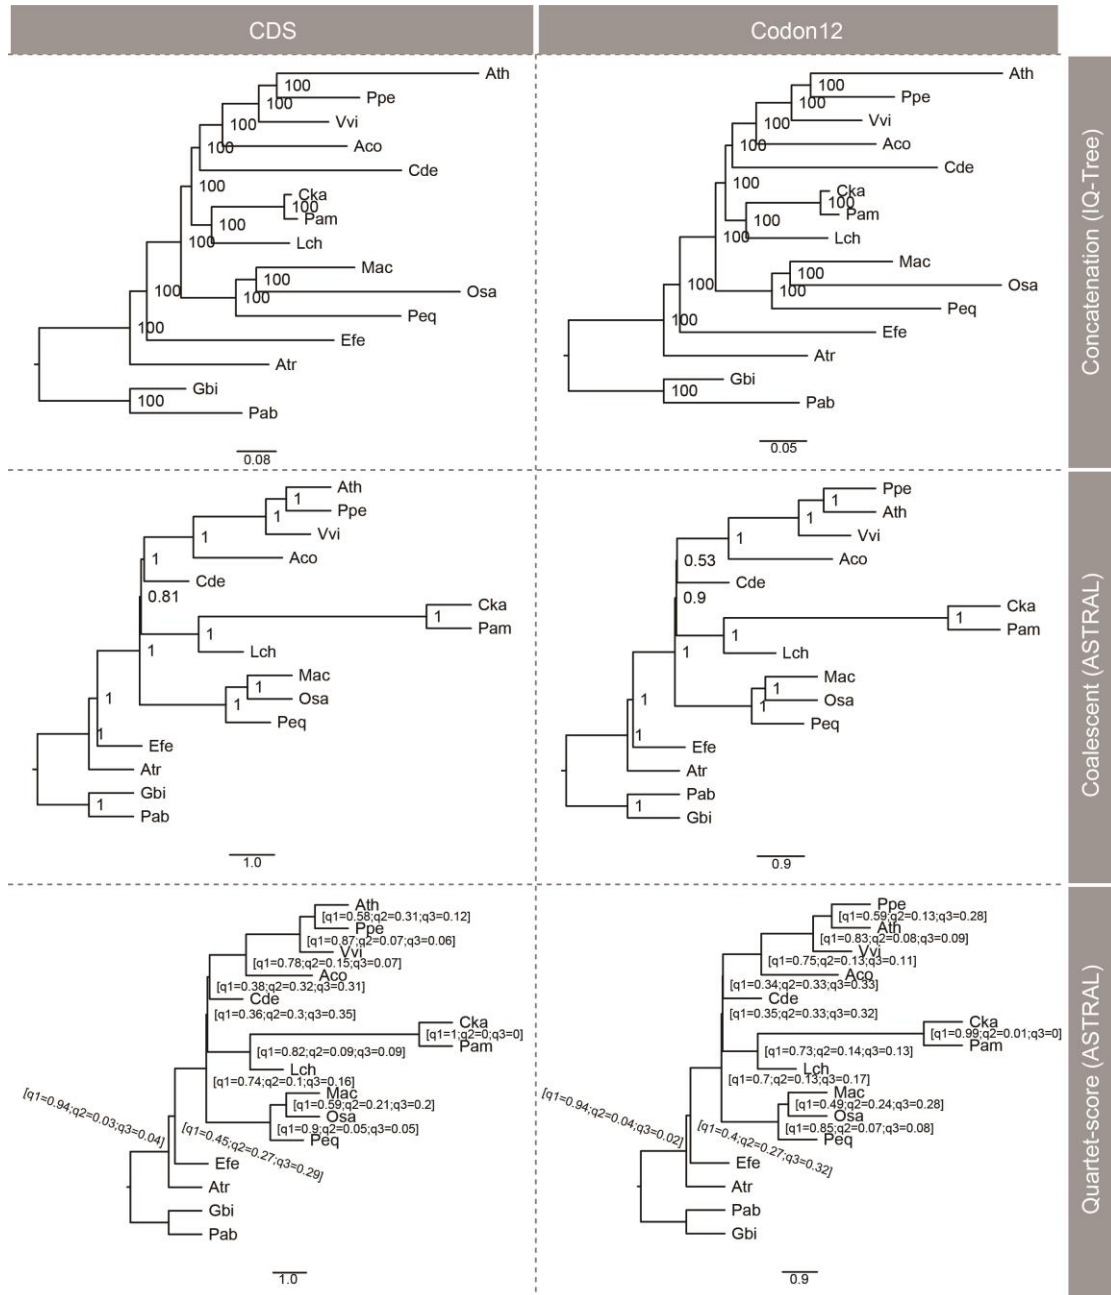

203

204 **Supplementary Figure 15. Phylogenetic relationships inferred with the 2,302 OSCGs.** The  
 205 corresponding relationship between abbreviations and full names are listing as follow: Aco - *A.*  
 206 *coerulea*, Ath - *A. thaliana*, Atr - *A. trichopoda*, Cde - *C. demersum*, Cka - *C. kanehirae*, Efe - *E.*  
 207 *ferox*, Gbi - *G. biloba*, Lch - *L. chinense*, Mac - *M. acuminata*, Osa - *O. sativa*, Pam - *P.*  
 208 *americana*, Pab - *P. abies*, Peq - *P. equestris*, Ppe - *P. persica*, Vvi - *V. vinifera*.

209

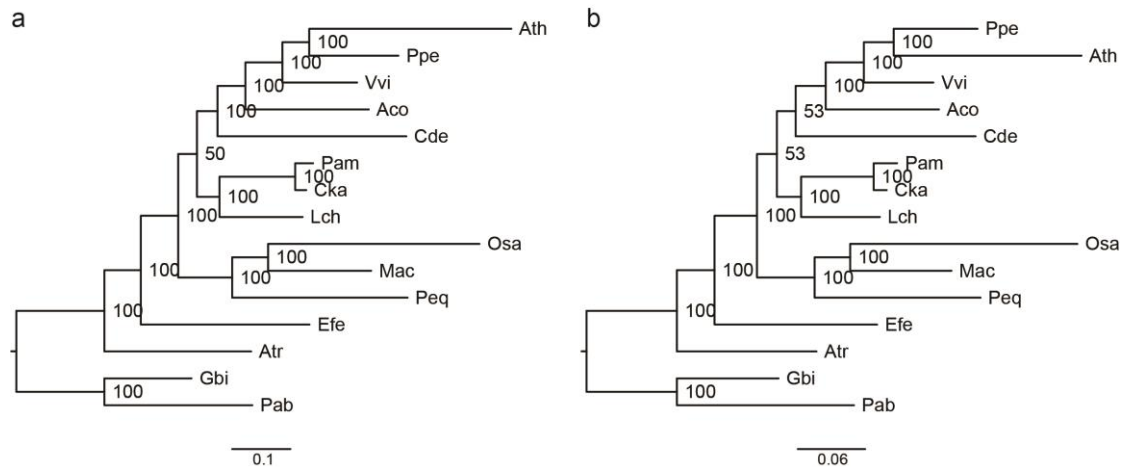

210

211 **Supplementary Figure 16. Phylogenetic relationships inferred by STAG and the low-copy**  
 212 **orthogroups (2,356 gene families).** The tree topologies were estimated by all the 2,356 low copy  
 213 gene family trees. The corresponding bootstrap were conculcated as follow: randomly selected one  
 214 tree from the bootstrap trees of each gene family results and then running STAG to generate one  
 215 bootstrap, and repeat 100 times. The two phylogenetic trees: (a) and (b) represent the CDS and  
 216 Codon12, respectively. The corresponding relationship between abbreviations and full names are  
 217 listing as follow: Aco - *A. coerulea*, Ath - *A. thaliana*, Atr - *A. trichopoda*, Cde - *C. demersum*,  
 218 Cka - *C. kanehirae*, Efe - *E. ferox*, Gbi - *G. biloba*, Lch - *L. chinense*, Mac - *M. acuminata*, Osa -  
 219 *O.sativa*, Pam – *P. americana*, Pab - *P. abies*, Peq - *P. equestris*, Ppe - *P. persica*, Vvi - *V. vinifera*.

220

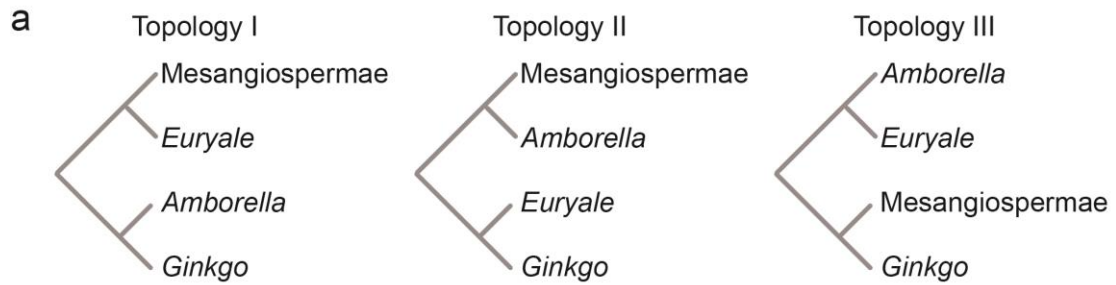

| Dataset  | Topology I | Topology II | Topology III | Chi-squared test         |
|----------|------------|-------------|--------------|--------------------------|
| CDS      | 636        | 374         | 364          | 103.88 ( $P < 2.2e-16$ ) |
| Codon 12 | 612        | 356         | 406          | 80.40 ( $P < 2.2e-16$ )  |

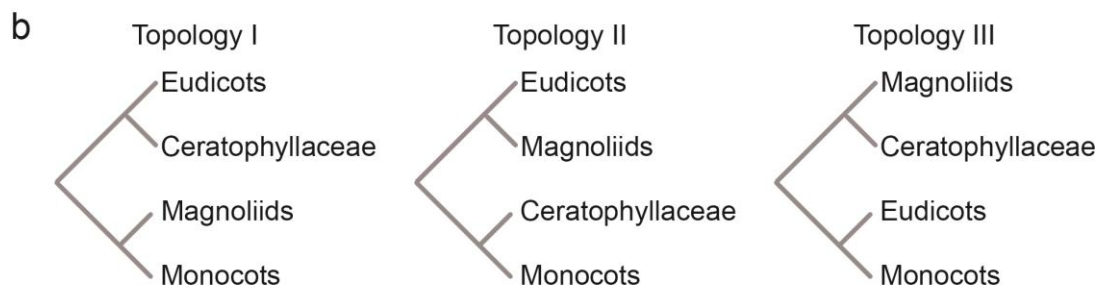

| Dataset  | Topology I | Topology II | Topology III | Chi-squared test         |
|----------|------------|-------------|--------------|--------------------------|
| CDS      | 545        | 380         | 449          | 29.99 ( $P = 3.08e-10$ ) |
| Codon 12 | 470        | 452         | 452          | 0.40 ( $P = 0.79$ )      |

221

222 **Supplementary Figure 17. Summary of the gene tree count for supporting the alternative**

223 **topologies (1,374 SSCGs).** (a) Representing the three alternative topologies within the basal

224 angiosperms. (b) The three topologies among the four Mesangiospermae groups. All the tree

225 counts were calculated by ASTRAL with the parameter '-t=2'.

226

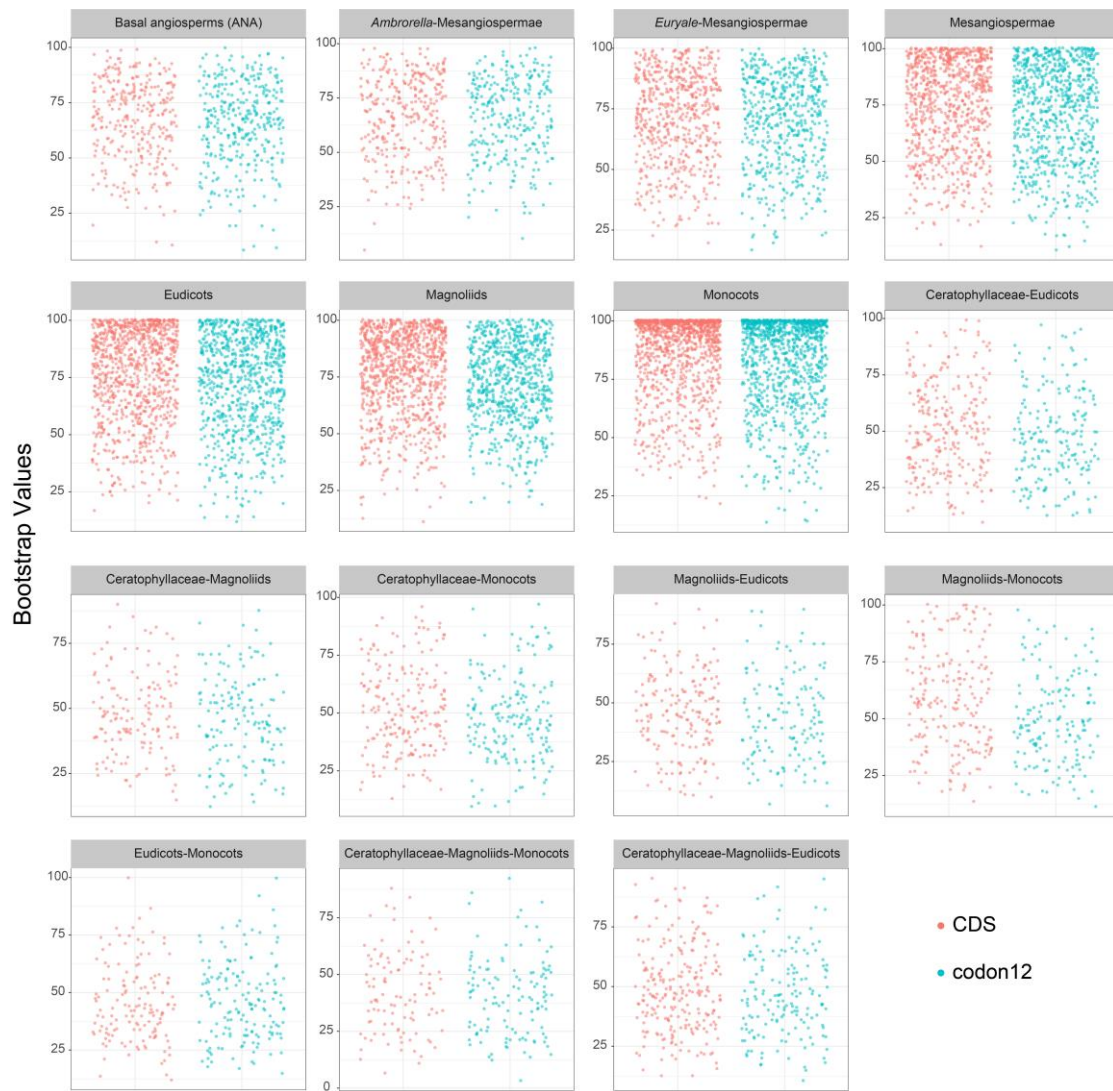

227

228 **Supplementary Figure 18. The distribution of bootstrap values supporting for monophyletic**  
 229 **group (1,374 SSCGs datasets).**

230

231



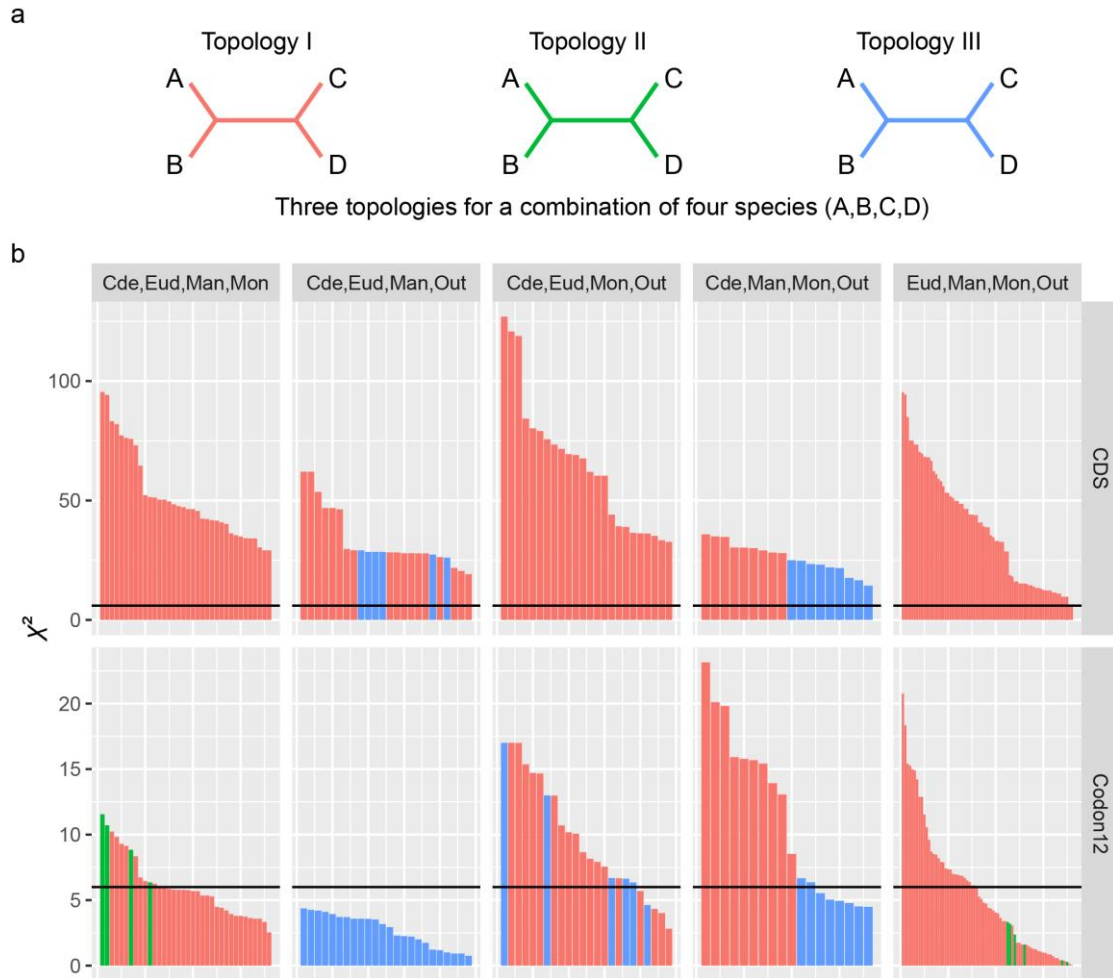

233

234 **Supplementary Figure 19. Summary of the gene tree distribution of three topologies within**  
 235 **the four Mesangiospermae groups (1,374 SSCGs).** (a), The three possible topologies for the  
 236 four species ((A, B), (C, D)), ((A, C), (B, D)) and ((A, D), (C, B)). (b), The corresponding quartet  
 237 tree counting result. The y axis is the Chi-Squared  $\chi^2$  values calculated between the three  
 238 topologies, and the n=the total number of observed trees for each four species combination. The  
 239 line  $y=5.9915$  represent the  $P=0.05$  threshold. The x axis represents all the combination of four  
 240 species from the corresponding four groups. Cde representing Ceratophyllaceae, Eud representing  
 241 eudicots, Mag represent magnoliids, Mon represent monocots and Out represent the basal  
 242 angiosperms and gymnosperms.

243

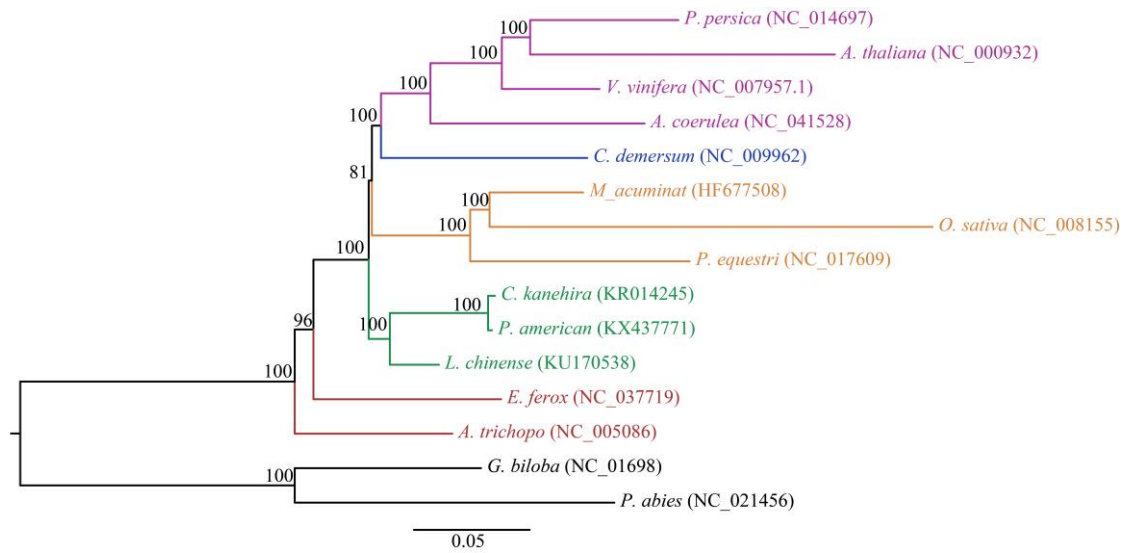

244

245 **Supplementary Figure 20. The Maximum Likelihood (ML) tree inferred based on the 72-**  
 246 **chloroplast gene' coding sequences from the 15 species.**

247

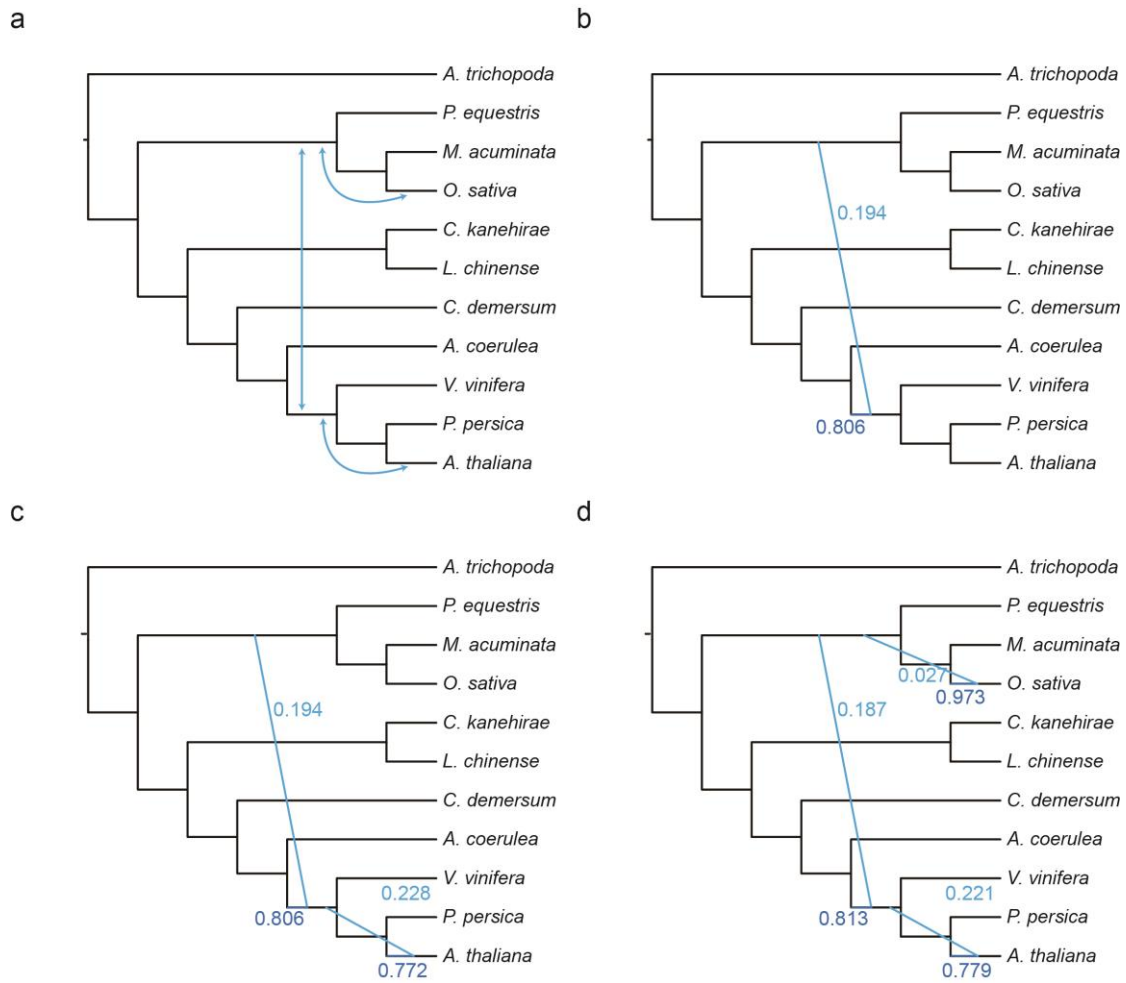

248

249 **Supplementary Figure 21. The likely hybrid events among the 13 species that inferred by**  
 250 **PhyloNetworks.** The blue lines represent the predicted hybrid events and the numbers on the blue  
 251 line represent the proportion of mixture. (a) Representing the simplified summary of the  
 252 hybridizations. (b)-(d) Representing the number of hybridizations from 1-3.

253

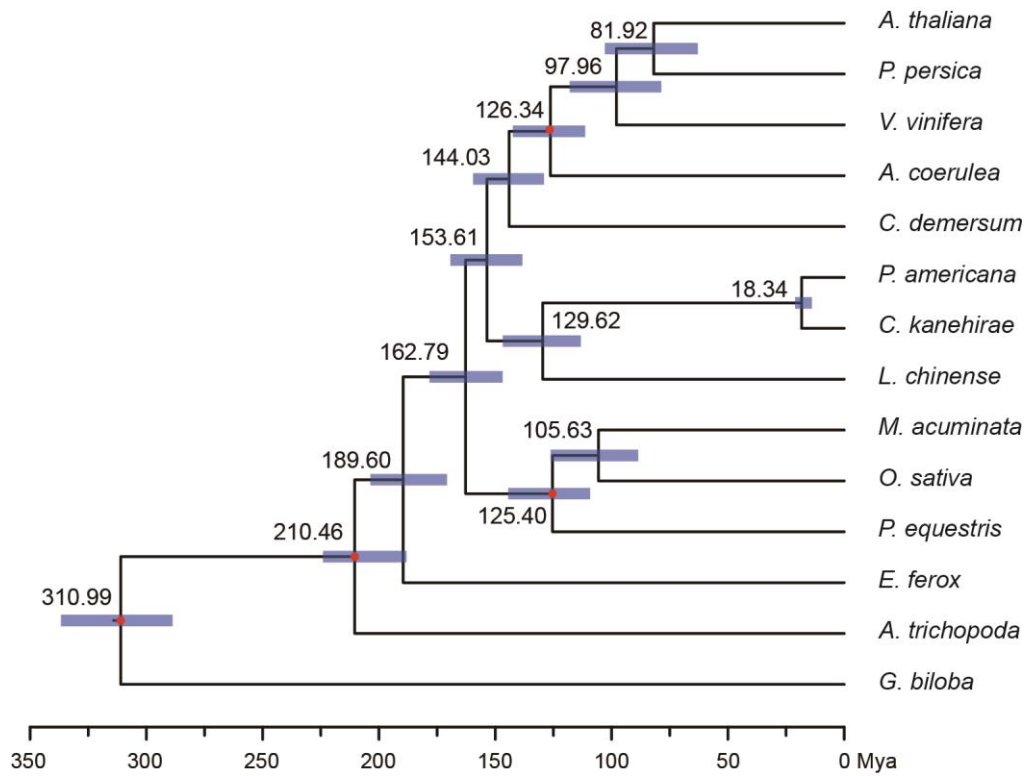

254

255 **Supplementary Figure 22. Divergence time estimated among 14 species.** This tree topology  
 256 was generated by MCMCtree and the CDS sequences. The red dots correspond to calibration  
 257 points as mentioned in the method. Divergence estimates (Mya, million years ago) are indicated  
 258 above each node and the blue nodal bars show the 95% confidence intervals (n=20,000  
 259 independent samples).

260

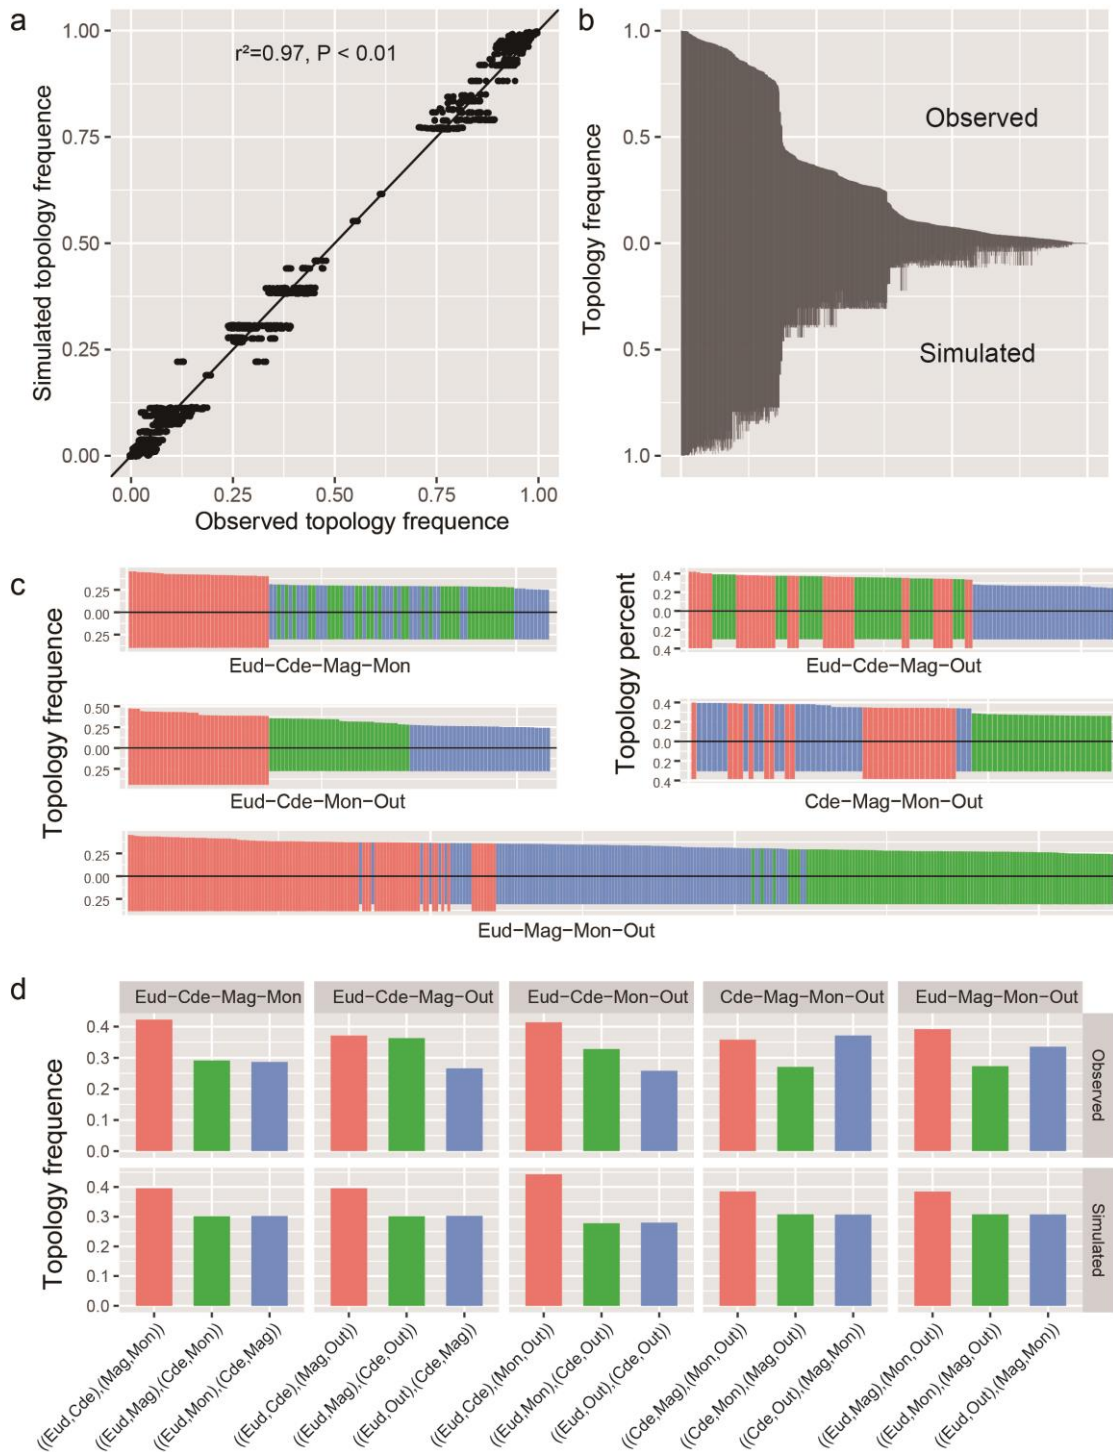

261

262

263

264

265

266

267

268

269

**Supplementary Figure 23. Tree count numbers between observed CDS gene trees and the corresponding simulated trees within each 4 species.** We simple the topology frequency within all the possible four species, and calculated the frequencies of each three topologies for each four species combination of all the 14 species. All the bar plot above the y=0 represent the observed frequencies and below y=0 represent the simulated frequencies. (a) Comparison of simulated frequencies based on coalescent probabilities of gene topologies of different classes with the corresponding observed frequencies. The correlation test was performed by the cor.test() function in R, with the sample size n = 3003 total possible topologies. (b) The frequencies of the CDS gene

270 trees and the simulated trees, and the order was according to the observed frequencies from large  
271 to small. (c) Only the four species come from different group (Eud: Eudicots, Cde:  
272 Ceratophyllaceae, Mag: magnoliids, Mon: monocots and Out: the basal angiosperms and  
273 gymnosperms) within (b) were showed. (d) The topology frequency estimated by Twisst software  
274 (<https://github.com/simonhmartin/twisst.git>) of each four group. Eud represent Eudicots. Cde  
275 represent Ceratophyllales. Mag represent Magnoliids. Mon represent Monocots. Out represent the  
276 basal angiosperms and gymnosperms. The three color represent the three topologies within one  
277 four species group. For example, a four species group is A, B, C and D and the different colors  
278 meaning: ed represent ((A,B),(C,D)), green represent ((A,C),(B,D)) and blue represent  
279 ((A,D),(B,C)).  
280

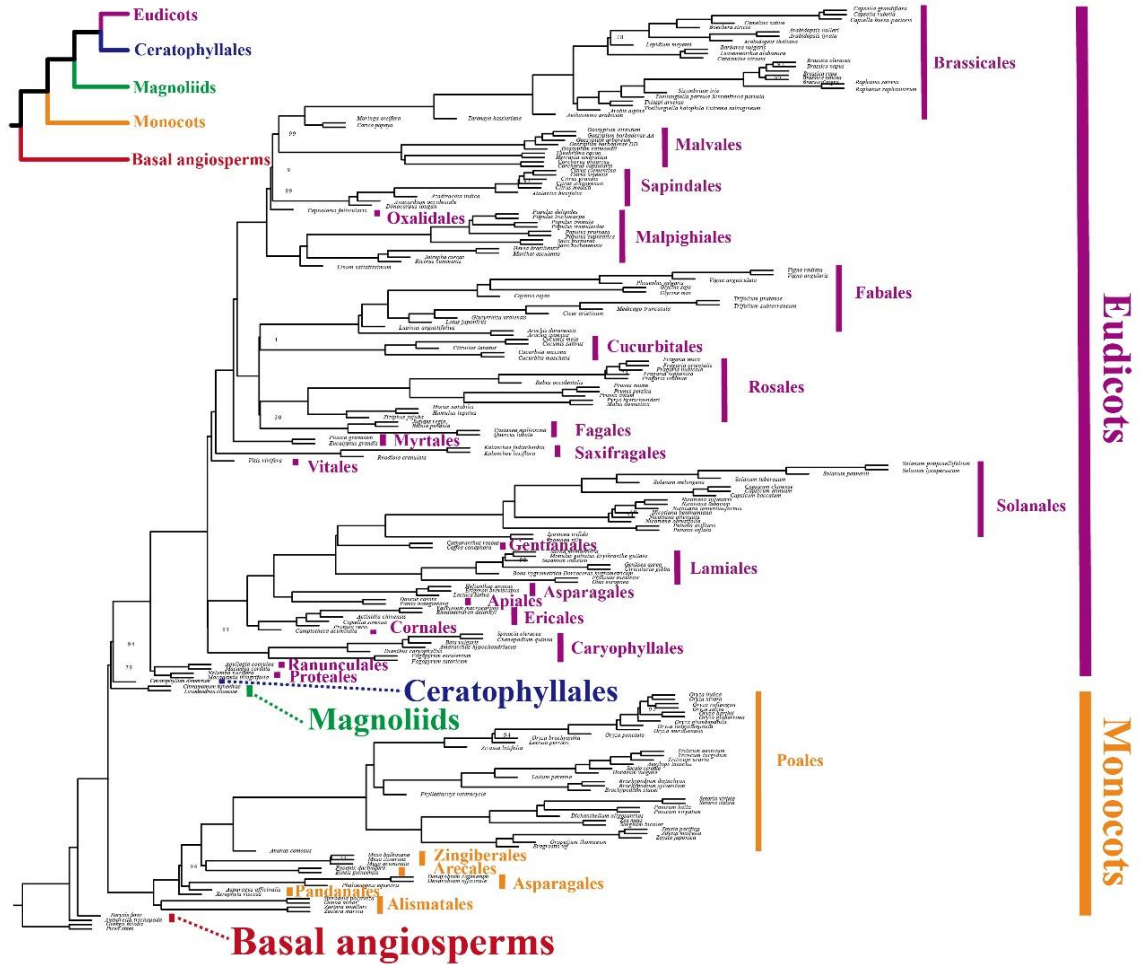

281

282 **Supplementary Figure 24. Species tree inferred based on the CDS sequences from 612**  
 283 **mostly single-copy OGs by ASTRAL.**

284

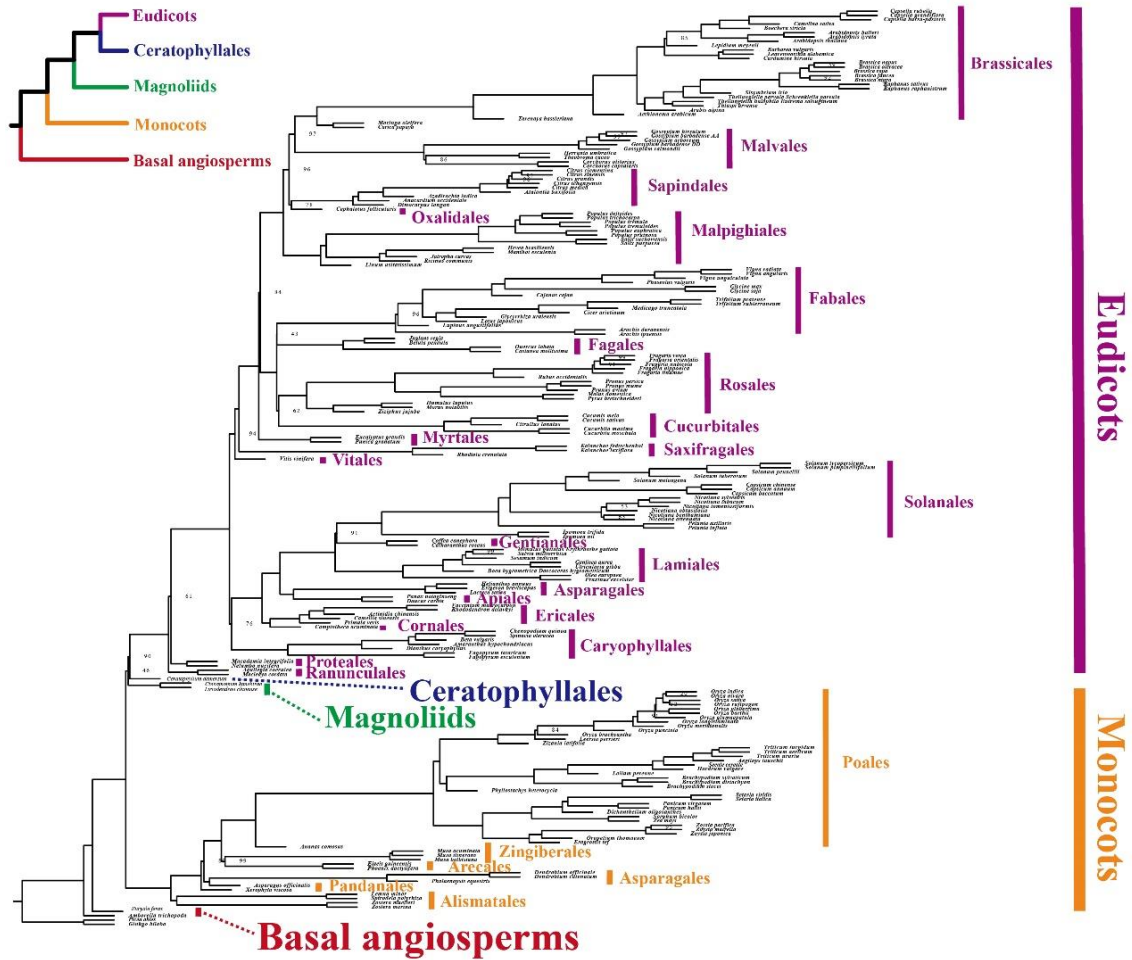

285  
286

287 **Supplementary Figure 25. Species tree inferred based on the Codon12 (1<sup>st</sup> and 2<sup>nd</sup> Codon)**  
288 **sequences from 612 mostly single-copy OGs by ASTRAL.**

289



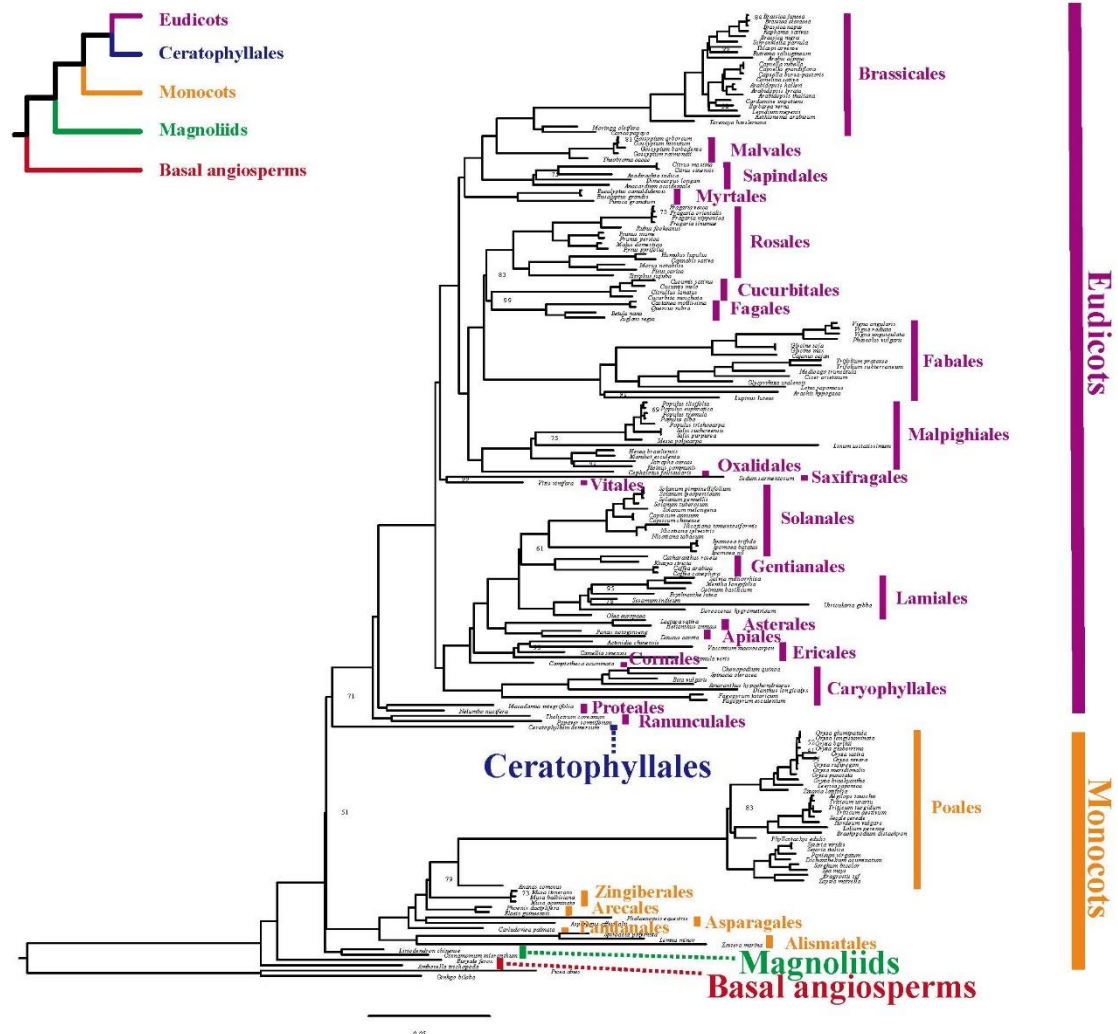

290 **Supplementary Figure 26. The Maximum Likelihood (ML) tree inferred based on the 72**  
 291 **chloroplast gene' coding sequences from 213 species.**  
 292

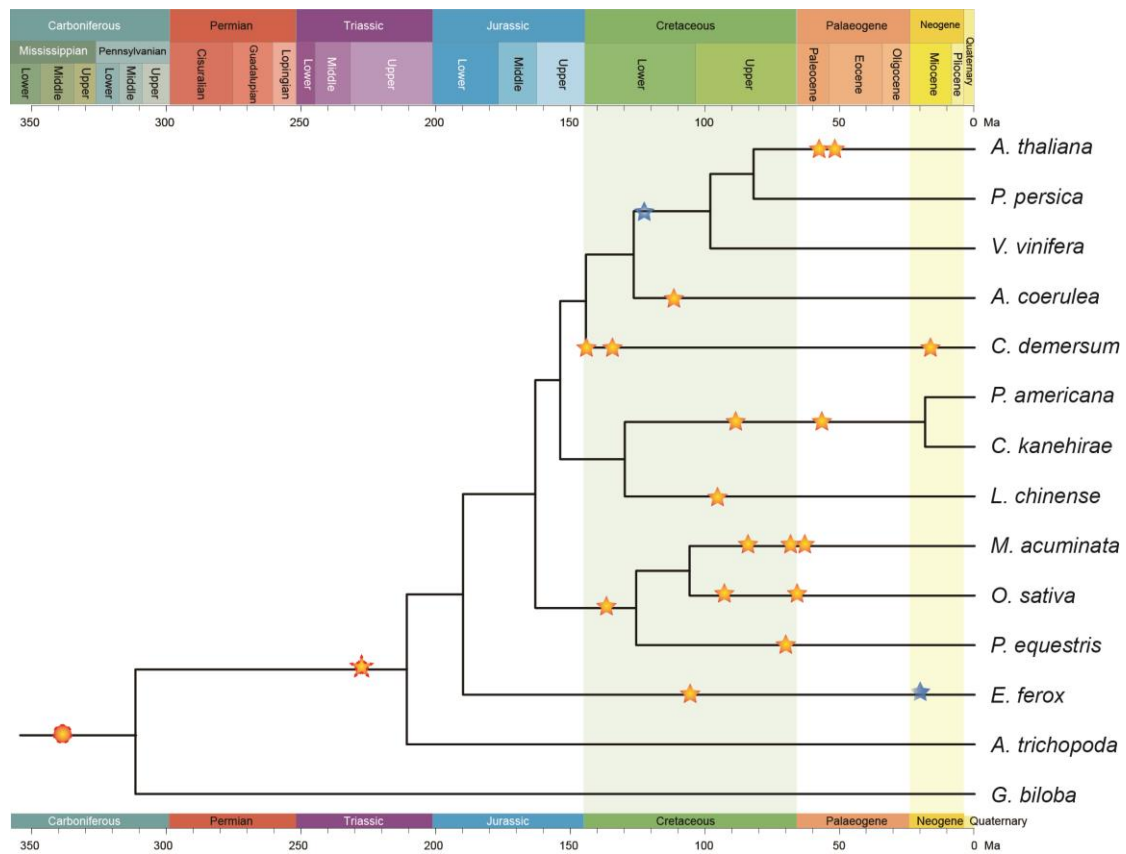

293

294

**Supplementary Figure 27. Polyploidizations in the evolutionary histories of 14 species.** The

295

polyploidizations of four species (*C. demersum*, *L. chinense*, *C. kanehirae*, *E. ferox*) were

296

determined in this paper while the other species were mainly referred from

297

<https://doi.org/10.1038/nrg.2017.26>. Yellow stars represent the whole genome duplication (WGD),

298

the blue stars represent the whole genome triplication (WGT) and the yellow circle represent the

299

polyploid events is uncertain (WGD, WGT or even higher polyploid). The star or circle with edge

300

marked by the red dash line represent the occurrence time is uncertain of this polyploid event.

301

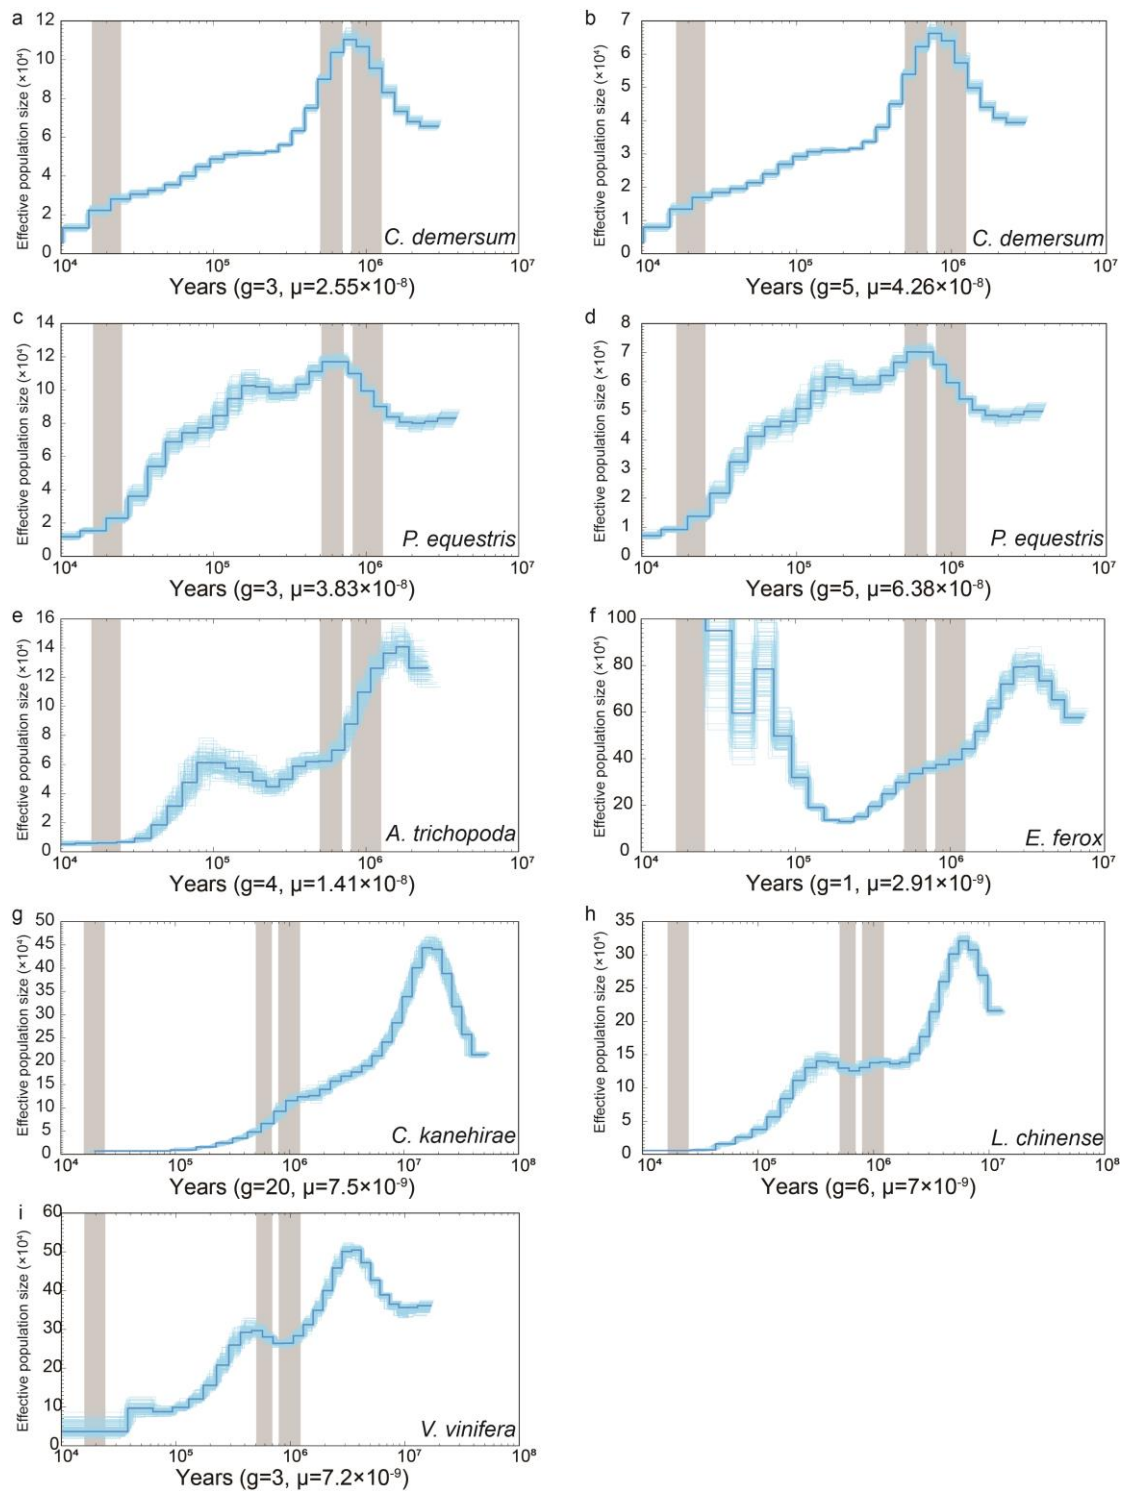

302

303 **Supplementary Figure 28. Demographic history inferred by PSMC.** The period of the  
 304 Xixiabangma Glaciation (XG, 1,170–800 thousand years ago, kya), Naynayxungla Glaciation  
 305 (NG, 780–500 kya) and the last glacial maximum (LGM, B20 kya) are shaded in grey. For the  
 306 species *C. demersum*, *E. ferox* and *P. equestris*, mutation rates (per site per year) were estimated  
 307 by r8s. We set the generation time of *E. ferox* to 1 year as it was an annual plant (f). While for the  
 308 other two species we have tried the generation time of 3 and 5 years as they were perennial herbs  
 309 (a-d). we found when the mutation rates (per site per year) were fixed, the trajectory of population

310 size changing were same and the generation time only effected the population size at each node.  
311 The generation time and mutation rates of the other four species were obtained from their  
312 published genome or resequencing paper (e, j-i). The Xixiabangma glaciation (1.17–0.8 Mya),  
313 Naynayxungla glaciation (0.78–0.5 Mya) and the last glacial maximum (~20 kya) are shaded in  
314 grey. The heterozygosity of *E. ferox* is very low (0.02%) and could be treated as single haploid  
315 genome because of the widespread artificial planting this species. We have added one more  
316 individual with the heterozygosity of 0.07%, and both the two individuals were used to construct  
317 the pseudodiploid genomes for the PSMC' analyses.

318

319

320 **Supplementary Tables**

321 **Supplementary Table 1. Genome sizes estimated based on 17-mer statistics.**

| Species           | Used Bases     | Used Reads  | K-mer Number   | K-mer Depth | Genome Size (Mb) |
|-------------------|----------------|-------------|----------------|-------------|------------------|
| Prickly waterlily | 16,338,812,400 | 108,925,416 | 14,595,239,321 | 19          | 768.2            |
| Hornwort          | 49,214,026,800 | 328,093,512 | 43,956,493,200 | 57          | 777.2            |

322  
323

324

**Supplementary Table 2. The total sequencing data for the two species.**

| Species           | Data type     | Platform                            | Library type | Number of reads | Total Bases (Gb) | Mean read length (bp) | Read N50 length (bp) |
|-------------------|---------------|-------------------------------------|--------------|-----------------|------------------|-----------------------|----------------------|
| prickly waterlily | Genome        | HiSeq2000 (raw)                     | Paired       | 324,302,586     | 48.65            | 150                   | -                    |
|                   |               | HiSeq2000 (clean) <sup>1</sup>      | Paired       | 318,450,322     | 47.35            | 148                   | -                    |
|                   |               | ONT PromethION (raw)                | Single       | 3,019,400       | 46.35            | 15,352                | 23,412               |
|                   |               | ONT PromethION (clean) <sup>1</sup> | Single       | 1,788,662       | 31.68            | 17,710                | 24,518               |
|                   | Transcriptome | Hi-C (raw)                          | Paired       | 562,521,870     | 84.38            | 150                   | -                    |
|                   |               | RNA-seq                             | Paired       | 124,580,456     | 18.69            | 150                   | -                    |
| hornwort          | Genome        | HiSeq2000 (raw)                     | Paired       | 328,093,512     | 49.21            | 150                   | -                    |
|                   |               | HiSeq2000 (clean) <sup>1</sup>      | Paired       | 315,914,852     | 46.41            | 147                   | -                    |
|                   |               | ONT PromethION (raw)                | Single       | 4,519,680       | 106.39           | 23,539                | 42,952               |
|                   |               | ONT PromethION (clean) <sup>1</sup> | Single       | 2,371,436       | 80.51            | 33,949                | 50,861               |
|                   | Transcriptome | Hi-C (raw)                          | Paired       | 892,591,026     | 133.89           | 150                   | -                    |
|                   |               | RNA-seq                             | Paired       | 38,969,088      | 5.85             | 150                   | -                    |

325  
326

<sup>1</sup>The clean data means the raw data after quality control. For HiSeq reads we used fastp software with those commands: -q 20 -5 -3; for long reads we just removed the reads with a mean quality score of 7.

327 **Supplementary Table 3. Summary of two genome assemblies.**

|                                  | <b>Prickly waterlily</b> |               | <b>Hornwort</b>  |               |
|----------------------------------|--------------------------|---------------|------------------|---------------|
|                                  | <b>Size (Mb)</b>         | <b>Number</b> | <b>Size (Mb)</b> | <b>Number</b> |
| <b>N90</b>                       | 1.41                     | 149           | 0.25             | 560           |
| <b>N50<sup>1</sup></b>           | 4.75                     | 44            | 1.56             | 136           |
| <b>Longest</b>                   | 17.51                    | -             | 9.03             | -             |
| <b>Total Contigs</b>             | 725.23                   | 451           | 733.26           | 1,366         |
| <b>Total number (≥10kb)</b>      | -                        | 447           | -                | 1,365         |
| <b>Total number (≥100kb)</b>     | -                        | 243           | -                | 820           |
| <b>Contig number (&gt;= 1Mb)</b> | -                        | 170           | -                | 219           |
| <b>GC content (%)</b>            | -                        | 36.45         | -                | 31.98         |

328 <sup>1</sup>N50 refer to the size above which 50% of the total length of the sequence assembly can be found.  
 329

330 **Supplementary Table 4. Summary of two genome chromosome leveled**  
 331 **assemblies.**

| <b>Prickly waterlily</b> |               |                     |                   | <b>Hornwort</b>   |               |                     |                   |
|--------------------------|---------------|---------------------|-------------------|-------------------|---------------|---------------------|-------------------|
| <b>Chromosome</b>        | <b>Length</b> | <b># of contigs</b> | <b>GC content</b> | <b>Chromosome</b> | <b>Length</b> | <b># of contigs</b> | <b>GC content</b> |
| <b>Chr01</b>             | 36,127,098    | 12                  | 36.40%            | <b>Chr01</b>      | 131,128,993   | 154                 | 31.76%            |
| <b>Chr02</b>             | 33,214,131    | 12                  | 36.35%            | <b>Chr02</b>      | 102,323,025   | 135                 | 31.68%            |
| <b>Chr03</b>             | 32,085,092    | 13                  | 36.85%            | <b>Chr03</b>      | 96,924,528    | 121                 | 31.72%            |
| <b>Chr04</b>             | 30,354,375    | 16                  | 36.37%            | <b>Chr04</b>      | 81,130,177    | 119                 | 31.62%            |
| <b>Chr05</b>             | 30,301,737    | 19                  | 36.62%            | <b>Chr05</b>      | 57,145,602    | 93                  | 31.72%            |
| <b>Chr06</b>             | 29,562,656    | 19                  | 36.12%            | <b>Chr06</b>      | 50,865,708    | 79                  | 31.55%            |
| <b>Chr07</b>             | 29,178,413    | 14                  | 37.07%            | <b>Chr07</b>      | 40,329,338    | 65                  | 31.65%            |
| <b>Chr08</b>             | 28,391,438    | 12                  | 35.97%            | <b>Chr08</b>      | 36,680,977    | 58                  | 31.69%            |
| <b>Chr09</b>             | 26,655,583    | 15                  | 35.99%            | <b>Chr09</b>      | 33,314,896    | 58                  | 31.67%            |
| <b>Chr10</b>             | 26,604,565    | 16                  | 36.03%            | <b>Chr10</b>      | 31,803,598    | 73                  | 31.76%            |
| <b>Chr11</b>             | 25,703,169    | 13                  | 36.39%            | <b>Chr11</b>      | 25,714,425    | 48                  | 31.67%            |
| <b>Chr12</b>             | 25,325,963    | 17                  | 36.20%            | <b>Chr12</b>      | 16,430,251    | 35                  | 31.49%            |
| <b>Chr13</b>             | 24,897,859    | 10                  | 36.97%            | <b>Total</b>      | 703,791,518   | 1,038               | 31.68%            |
| <b>Chr14</b>             | 24,782,706    | 19                  | 36.69%            |                   |               |                     |                   |
| <b>Chr15</b>             | 23,866,150    | 21                  | 35.91%            |                   |               |                     |                   |
| <b>Chr16</b>             | 23,493,034    | 17                  | 36.54%            |                   |               |                     |                   |
| <b>Chr17</b>             | 23,053,665    | 14                  | 36.18%            |                   |               |                     |                   |
| <b>Chr18</b>             | 22,747,766    | 9                   | 35.97%            |                   |               |                     |                   |
| <b>Chr19</b>             | 22,494,454    | 12                  | 35.69%            |                   |               |                     |                   |
| <b>Chr20</b>             | 22,322,537    | 9                   | 36.97%            |                   |               |                     |                   |
| <b>Chr21</b>             | 21,789,828    | 12                  | 36.54%            |                   |               |                     |                   |
| <b>Chr22</b>             | 21,469,475    | 11                  | 36.77%            |                   |               |                     |                   |
| <b>Chr23</b>             | 21,357,665    | 5                   | 36.12%            |                   |               |                     |                   |
| <b>Chr24</b>             | 20,198,942    | 7                   | 36.45%            |                   |               |                     |                   |
| <b>Chr25</b>             | 20,182,140    | 13                  | 36.85%            |                   |               |                     |                   |
| <b>Chr26</b>             | 19,815,768    | 2                   | 36.96%            |                   |               |                     |                   |
| <b>Chr27</b>             | 19,323,887    | 6                   | 37.02%            |                   |               |                     |                   |
| <b>Chr28</b>             | 18,973,550    | 5                   | 36.54%            |                   |               |                     |                   |
| <b>Chr29</b>             | 16,955,657    | 4                   | 36.63%            |                   |               |                     |                   |
| <b>Total</b>             | 721,229,303   | 35,400              | 36.44%            |                   |               |                     |                   |

332



333 **Supplementary Table 5. Assessment of the two species genome assembly by**  
 334 **BUSCO.**

| <b>Description</b>              | <b>Number of genes</b>   |                 | <b>% Percentage</b>      |                 |
|---------------------------------|--------------------------|-----------------|--------------------------|-----------------|
|                                 | <b>Prickly waterlily</b> | <b>Hornwort</b> | <b>Prickly waterlily</b> | <b>Hornwort</b> |
| Complete BUSCOs                 | 1,233                    | 1,196           | 85.7                     | 83.1            |
| Complete and single-copy BUSCOs | 764                      | 990             | 53.1                     | 68.8            |
| Complete and duplicated BUSCOs  | 469                      | 206             | 32.6                     | 14.3            |
| Fragmented BUSCOs               | 40                       | 51              | 2.8                      | 3.5             |
| Missing BUSCOs                  | 147                      | 193             | 11.5                     | 13.4            |

335  
 336

337 **Supplementary Table 6. Numbers of NGS reads mapped to the assemblies.**

|                          | <b>Total pairs<br/>(PE) reads</b> | <b>Pair end<br/>mapped<br/>reads</b> | <b>Pair end<br/>mapped<br/>ratio (%)</b> | <b>Single end<br/>mapped<br/>reads</b> | <b>Single end<br/>mapped<br/>ratio (%)</b> | <b>Total<br/>mapped<br/>reads</b> | <b>Total<br/>mapped<br/>ratio (%)</b> |
|--------------------------|-----------------------------------|--------------------------------------|------------------------------------------|----------------------------------------|--------------------------------------------|-----------------------------------|---------------------------------------|
| <b>Prickly waterlily</b> | 318,853,617                       | 308,313,098                          | 96.69                                    | 162,799                                | 0.05                                       | 308,879,192                       | 96.87                                 |
| <b>Hornwort</b>          | 323,088,340                       | 266,431,704                          | 82.46                                    | 1,377,948                              | 0.42                                       | 274,983,140                       | 85.11                                 |

338  
339

340 **Supplementary Table 7. Evaluation of completeness of the two genomes using**  
 341 **data set of *de novo* assembled transcripts.**

| Data set                 | Length type | Number  | Total length | Covered by assembly (%) | With >90% sequence in one scaffold |                | With >50% sequence in on scaffold |                |
|--------------------------|-------------|---------|--------------|-------------------------|------------------------------------|----------------|-----------------------------------|----------------|
|                          |             |         |              |                         | Number                             | Percentage (%) | Number                            | Percentage (%) |
| <b>Prickly waterlily</b> | >200 bp     | 161,944 | 148,574,288  | 94.23                   | 143,101                            | 88.36          | 151,952                           | 93.83          |
|                          | >500 bp     | 78,535  | 122,443,098  | 98.96                   | 72,491                             | 92.30          | 77,508                            | 98.69          |
|                          | >1 kb       | 45,133  | 99,023,091   | 99.69                   | 42,108                             | 93.30          | 44,939                            | 99.57          |
| <b>Hornwort</b>          | >200 bp     | 186,160 | 88,551,535   | 86.08                   | 150,614                            | 80.91          | 158,678                           | 85.24          |
|                          | >500 bp     | 54,962  | 48,991,430   | 97.37                   | 50,749                             | 92.33          | 53,216                            | 96.82          |
|                          | >1 kb       | 15,359  | 21,561,387   | 99.18                   | 14,425                             | 93.92          | 15,151                            | 98.65          |

342  
 343

344 **Supplementary Table 8. Comparison of gene space of the prickly waterlily and**  
 345 **hornwort genomes with other genomes.**

| Species              | Total Genes | Average Gene Lengtha (bp) | Average CDS Lengtha (bp) | Average Exons per Genea | Average Exon Lengtha (bp) | Average Intron Lengtha (bp) |
|----------------------|-------------|---------------------------|--------------------------|-------------------------|---------------------------|-----------------------------|
| <i>A. trichopoda</i> | 27,313      | 5,607.1                   | 944.9                    | 4.1                     | 232.7                     | 1,523.5                     |
| <i>E. ferox</i>      | 40,297      | 6,174.7                   | 1,231.6                  | 5.7                     | 217.7                     | 938.4                       |
| <i>M. acuminata</i>  | 36,525      | 3,804.1                   | 1,038.4                  | 5.4                     | 191.9                     | 579.4                       |
| <i>O. sativa</i>     | 35,825      | 3,087.0                   | 986.1                    | 3.8                     | 262.8                     | 429.4                       |
| <i>P. equestris</i>  | 29,431      | 9,528.9                   | 1,096.0                  | 3.9                     | 278.7                     | 2,908.4                     |
| <i>C. demersum</i>   | 30,138      | 10,643.0                  | 1,239.2                  | 5.2                     | 239.8                     | 2,171.0                     |
| <i>C. kanehirae</i>  | 27,885      | 7,596.1                   | 1,311.0                  | 5.4                     | 242.6                     | 1,427.0                     |
| <i>L. chinense</i>   | 35,535      | 11,430.2                  | 1,266.9                  | 4.9                     | 260.2                     | 2,395.5                     |
| <i>A. coerulea</i>   | 30,023      | 3,577.2                   | 1,122.7                  | 4.6                     | 244.1                     | 468.3                       |
| <i>V. vinifera</i>   | 29,971      | 5,133.6                   | 1,095.8                  | 4.7                     | 230.7                     | 968.9                       |
| <i>A. thaliana</i>   | 27,655      | 2,368.3                   | 1,201.6                  | 5.1                     | 237.5                     | 159.5                       |
| <i>P. persica</i>    | 26,873      | 3,237.5                   | 1,215.2                  | 4.9                     | 248.0                     | 332.3                       |

346

347 **Supplementary Table 9. Summary of gene family clustering among the 14**  
 348 **genomes (including 12 angiosperms and 2 gymnosperms).**

| Species              | Total genes | Genes in families | Unclustered genes | Families | Unique families | Genes per family | Maximum gene family size |
|----------------------|-------------|-------------------|-------------------|----------|-----------------|------------------|--------------------------|
| <i>A. coerulea</i>   | 29,702      | 23,890            | 5,812             | 12,985   | 941             | 1.84             | 194                      |
| <i>A. thaliana</i>   | 27,307      | 23,394            | 3,913             | 12,247   | 816             | 1.91             | 138                      |
| <i>A. trichopoda</i> | 26,814      | 19,132            | 7,682             | 12,243   | 958             | 1.56             | 178                      |
| <i>C. demersum</i>   | 29,717      | 21,160            | 8,557             | 11,083   | 1,016           | 1.91             | 30                       |
| <i>C. kanehirae</i>  | 27,853      | 23,506            | 4,347             | 12,124   | 522             | 1.94             | 131                      |
| <i>E. ferox</i>      | 40,197      | 31,481            | 8,716             | 11,745   | 1,139           | 2.68             | 85                       |
| <i>G. biloba</i>     | 27,310      | 11,426            | 15,884            | 9,205    | 246             | 1.24             | 13                       |
| <i>L. chinense</i>   | 35,264      | 31,294            | 3,970             | 12,291   | 756             | 2.55             | 793                      |
| <i>M. acuminata</i>  | 34,318      | 25,879            | 8,439             | 11,954   | 595             | 2.16             | 73                       |
| <i>O. sativa</i>     | 34,412      | 22,964            | 11,448            | 12,540   | 1,471           | 1.83             | 65                       |
| <i>P. abies</i>      | 22,159      | 18,003            | 4,156             | 8,539    | 1,017           | 2.11             | 498                      |
| <i>P. equestris</i>  | 28,892      | 20,392            | 8,500             | 11,789   | 878             | 1.73             | 434                      |
| <i>P. persica</i>    | 26,783      | 22,243            | 4,540             | 12,976   | 516             | 1.71             | 139                      |
| <i>V. vinifera</i>   | 28,284      | 22,203            | 6,081             | 12,918   | 658             | 1.72             | 118                      |
| <b>All</b>           | 419,012     | 316,967           | 102,045           | 28,710   | -               | 11.04            | -                        |

349  
 350

351 **Supplementary Table 10. Functional annotation of the predicted genes.**

|                    | Database         | Prickly waterlily |             | Hornwort |             |
|--------------------|------------------|-------------------|-------------|----------|-------------|
|                    |                  | Number            | Percent (%) | Number   | Percent (%) |
| <b>Total</b>       |                  | 40,297            | 100         | 30,138   | 100         |
|                    | <b>InterPro</b>  | 30,281            | 75.14       | 23,265   | 77.19       |
|                    | <b>GO</b>        | 21,905            | 54.36       | 16,591   | 55.05       |
| <b>Annotated</b>   | <b>Swissprot</b> | 28,216            | 70.02       | 21,484   | 71.29       |
|                    | <b>TrEMBL</b>    | 34,131            | 84.70       | 26,835   | 89.04       |
|                    | <b>KEGG</b>      | 17,169            | 42.60       | 13,425   | 44.55       |
| <b>Unannotated</b> |                  | 5,793             | 14.38       | 3,081    | 10.22       |

352

353

354 **Supplementary Table 11. Prediction of repetitive elements in the assembled**  
 355 **prickly waterlily and hornwort genomes.**

| Type                        | Prickly waterlily |                          | Hornwort    |                          |
|-----------------------------|-------------------|--------------------------|-------------|--------------------------|
|                             | length (bp)       | percentage of genome (%) | length (bp) | percentage of genome (%) |
| <b>Tandem repeats</b>       | 94,553            | 1.05                     | 5,080,212   | 0.69                     |
| <b>satellites</b>           | 94,553            | 0.01                     | 3,572,447   | 0.49                     |
| <b>simple repeat</b>        | 7,518,091         | 1.04                     | 1,507,765   | 0.21                     |
| <b>Interspersed repeats</b> | 270,402,304       | 37.29                    | 457,483,862 | 62.39                    |
| <b>SINEs</b>                | 167,387           | 0.02                     | 1,402,370   | 0.19                     |
| <b>LINEs</b>                | 551,798           | 0.08                     | 159,078,812 | 21.69                    |
| <b>LTR elements</b>         | 118,221,353       | 16.30                    | 145,252,899 | 19.81                    |
| <i>Gypsy</i>                | 105,831,755       | 14.59                    | 96,912,734  | 13.22                    |
| <i>Copia</i>                | 12,058,578        | 1.66                     | 18,839,836  | 2.57                     |
| <b>DNA transposons</b>      | 33,259,656        | 4.59                     | 44,049,067  | 6.01                     |
| <b>unclassified</b>         | 118,202,110       | 16.30                    | 107,700,714 | 14.69                    |
| <b>In total</b>             | 278,114,948       | 38.35                    | 462,564,074 | 63.08                    |

356  
357

358 **Supplementary Table 12. Kernel function analysis of Ks distribution related to**  
359 **duplication events within each genome and between genomes (after evolutionary**  
360 **rate correction).**

| Intragenomic/Intergenomic colinear gene pairs    | Weight coefficient related to duplication event or speciation | Peak of Ks distribution ( $\mu$ ) | Deviation ( $\sigma$ ) | Number of syntenic blocks |
|--------------------------------------------------|---------------------------------------------------------------|-----------------------------------|------------------------|---------------------------|
| <i>Vitis_Vitis</i>                               | 0.9544                                                        | 1.0305                            | 0.1104                 | 143                       |
| <i>Liriodendron-Liriodendron</i>                 | 0.8827                                                        | 0.8070                            | 0.0936                 | 161                       |
| <i>Euryale-Euryale-1<sup>a</sup></i>             | 0.5353                                                        | 0.1420                            | 0.0239                 | 603                       |
| <i>Euryale-Euryale-2<sup>a</sup></i>             | 0.4520                                                        | 0.8407                            | 0.0780                 | 1,365                     |
| <i>Ceratophyllum-Ceratophyllum-1<sup>a</sup></i> | 0.4182                                                        | 0.1162                            | 0.0209                 | 162                       |
| <i>Ceratophyllum-Ceratophyllum-2<sup>a</sup></i> | 0.3837                                                        | 1.1362                            | 0.1321                 | 79                        |
| <i>Ceratophyllum-Ceratophyllum-3<sup>a</sup></i> | 0.1048                                                        | 1.4061                            | 0.0488                 | 60                        |
| <i>Cinnamomum-Cinnamomum-1<sup>a</sup></i>       | 0.3841                                                        | 0.9443                            | 0.0954                 | 79                        |
| <i>Cinnamomum-Cinnamomum-2<sup>a</sup></i>       | 0.1266                                                        | 0.5956                            | 0.0493                 | 195                       |
| <i>Avocado-Avocado-1<sup>a</sup></i>             | 0.3328                                                        | 0.5956                            | 0.0813                 | 41                        |
| <i>Avocado-Avocado-2<sup>a</sup></i>             | 0.2878                                                        | 0.9443                            | 0.1114                 | 30                        |
| <i>Amborella-Euryale</i>                         | 0.9483                                                        | 1.6342                            | 0.2149                 | 427                       |
| <i>Amborella-Oryza</i>                           | 0.9597                                                        | 1.6392                            | 0.2221                 | 151                       |
| <i>Amborella-Vitis</i>                           | 0.9526                                                        | 1.6341                            | 0.2022                 | 259                       |
| <i>Ceratophyllum-Oryza</i>                       | 0.8573                                                        | 1.5014                            | 0.2580                 | 172                       |
| <i>Cinnamomum-Oryza</i>                          | 0.8348                                                        | 1.4702                            | 0.1533                 | 376                       |
| <i>Ceratophyllum-Vitis</i>                       | 0.9525                                                        | 1.4138                            | 0.1802                 | 401                       |
| <i>Ceratophyllum-Cinnamomum</i>                  | 0.9186                                                        | 1.4189                            | 0.1634                 | 518                       |
| <i>Liriodendron-Vitis</i>                        | 0.9558                                                        | 1.2768                            | 0.1269                 | 380                       |
| <i>Cinnamomum-Vitis</i>                          | 0.9483                                                        | 1.2720                            | 0.1305                 | 480                       |
| <i>Liriodendron-Cinnamomum</i>                   | 0.9720                                                        | 0.9453                            | 0.1297                 | 409                       |
| <i>Cinnamomum-Avocado</i>                        | 0.3223                                                        | 0.0801                            | 0.0509                 | 105                       |

<sup>a</sup>Representing the whole genome polyploidization events occurred orders (from the old to recent).

361  
362



363 **Supplementary Table 13. Data on all 15 species used during the evolution**  
 364 **analysis.**

| <b>Species</b>       | <b>Database</b>       | <b>Number of genes</b> | <b>Number of original genes</b> |
|----------------------|-----------------------|------------------------|---------------------------------|
| <i>G. biloba</i>     | PLAZA v4.0            | 27,310                 | 30,404                          |
| <i>P. abies</i>      | PLAZA v4.0            | 22,159                 | 26,437                          |
| <i>A. trichopoda</i> | Ensembl Plants v42    | 26,814                 | 27,313                          |
| <i>E. ferox</i>      | -                     | 40,197                 | 40,297                          |
| <i>M. acuminata</i>  | Ensembl Plants v42    | 34,318                 | 36,525                          |
| <i>O. sativa</i>     | Ensembl Plants v42    | 34,412                 | 35,825                          |
| <i>P. equestris</i>  | PLAZA v4.0            | 29,406                 | 29,431                          |
| <i>C. demersum</i>   | -                     | 29,717                 | 30,138                          |
| <i>C. kanehirae</i>  | NCBI (ASBRC_Ckan_1.0) | 27,853                 | 27,885                          |
| <i>L. chinense</i>   | NCBI (NJFU_Lchi_2.0)  | 35,264                 | 35,269                          |
| <i>A. coerulea</i>   | JGI v12               | 29,702                 | 30,023                          |
| <i>V. vinifera</i>   | Ensembl Plants v42    | 28,284                 | 29,927                          |
| <i>A. thaliana</i>   | Ensembl Plants v42    | 27,307                 | 27,678                          |
| <i>P. persica</i>    | Ensembl Plants v42    | 26,783                 | 26,873                          |
| <i>P. americana</i>  | CoGe                  | 22,441                 | 22,270                          |

365

366 **Supplementary Table 14. The gene length information of the 72 plastid genes among the 15 species.**

| Geneid | <i>A. coerulea</i> | <i>A. thaliana</i> | <i>A. trichopoda</i> | <i>C. demersum</i> | <i>C. kanehirae</i> | <i>E. ferox</i> | <i>G. biloba</i> | <i>L. chinense</i> | <i>M. acuminata</i> | <i>O. sativa</i> | <i>P. abies</i> | <i>P. americana</i> | <i>P. equestris</i> | <i>P. persica</i> | <i>V. vinifera</i> |
|--------|--------------------|--------------------|----------------------|--------------------|---------------------|-----------------|------------------|--------------------|---------------------|------------------|-----------------|---------------------|---------------------|-------------------|--------------------|
| accD   | 1494               | 1467               | 1623                 | 1527               | 1512                | 1461            | 972              | 1467               | 1800                | -                | 981             | 1512                | 1488                | 1476              | 1527               |
| atpA   | 1524               | 1524               | 1524                 | 1524               | 1524                | 1524            | 1533             | 1524               | 1524                | 1524             | 1524            | 1524                | 1524                | 1524              | 1524               |
| atpB   | 1497               | 1497               | 1503                 | 1497               | 1497                | 1497            | 1464             | 1497               | 1497                | -                | 1479            | 1497                | 1497                | 1479              | 1497               |
| atpE   | 402                | 399                | 405                  | 402                | 405                 | 405             | 417              | 405                | 408                 | 414              | 414             | 405                 | 405                 | 402               | 402                |
| atpF   | 555                | 555                | 555                  | 555                | 555                 | 555             | 570              | 555                | 555                 | -                | 555             | 555                 | 555                 | 555               | 558                |
| atpH   | 246                | 246                | 246                  | 246                | 246                 | 246             | 246              | 246                | 246                 | 246              | 246             | 246                 | 246                 | 246               | 246                |
| atpI   | 744                | 750                | 747                  | 744                | 744                 | 747             | 747              | 744                | 744                 | 744              | 747             | 744                 | 744                 | 744               | 744                |
| ccsA   | 984                | 987                | 942                  | 960                | -                   | 927             | 1020             | 966                | 990                 | 966              | 963             | 951                 | 966                 | 969               | 969                |
| cemA   | 681                | 690                | 690                  | 690                | 690                 | 690             | 705              | 690                | 690                 | -                | 786             | 690                 | 690                 | 690               | 690                |
| clpP   | -                  | 591                | 609                  | 609                | 609                 | 609             | 600              | 606                | 621                 | 651              | 591             | 609                 | 612                 | 588               | 591                |
| matK   | 1530               | 1515               | 1506                 | 1548               | 1524                | 1524            | 1539             | 1524               | 1536                | 1536             | 1548            | 1524                | 1341                | 1521              | 1509               |
| ndhC   | 363                | 363                | 363                  | 363                | 363                 | 363             | 408              | 363                | 363                 | 363              | -               | 363                 | -                   | 363               | 363                |
| ndhD   | 1512               | 1503               | 1503                 | 1503               | 1509                | 1503            | 1506             | 1500               | 1506                | 1503             | -               | 1506                | -                   | 1503              | 1503               |
| ndhE   | 306                | 306                | 306                  | 306                | 306                 | 306             | 303              | 306                | 306                 | 306              | -               | 306                 | -                   | 306               | 306                |
| ndhG   | 534                | 531                | 534                  | 531                | 531                 | 534             | 543              | 531                | 531                 | 531              | -               | 531                 | -                   | 531               | 531                |
| ndhH   | 1182               | 1182               | 1182                 | 1182               | 1182                | 1182            | 1176             | 1182               | 1182                | 1182             | -               | 1182                | -                   | 1182              | 1182               |
| ndhI   | 540                | 519                | 543                  | 513                | 543                 | 540             | 543              | 543                | 543                 | 543              | -               | 543                 | -                   | 519               | 504                |
| ndhJ   | 477                | 477                | 477                  | 477                | 477                 | 477             | 477              | 477                | 480                 | 480              | -               | 477                 | -                   | 477               | 477                |
| ndhK   | 684                | 678                | 678                  | 750                | 858                 | 678             | 957              | 858                | 753                 | 678              | -               | 858                 | -                   | 681               | 678                |
| petA   | 969                | 963                | 963                  | 963                | 963                 | 969             | 963              | 963                | 963                 | 963              | 960             | 963                 | 963                 | 963               | 963                |
| petB   | 648                | 648                | 648                  | 648                | 648                 | 648             | 657              | 648                | 654                 | -                | 648             | 648                 | 648                 | 648               | 648                |
| petD   | 528                | 483                | 483                  | 483                | 477                 | 513             | 474              | 489                | 483                 | 483              | 537             | 489                 | 492                 | 483               | 483                |
| petG   | 114                | 114                | 114                  | 114                | 114                 | 114             | 114              | 114                | 114                 | -                | 114             | 114                 | 114                 | 114               | 114                |
| petL   | 96                 | 96                 | -                    | 96                 | 96                  | 96              | 108              | 96                 | 96                  | -                | 102             | 96                  | 96                  | 96                | 96                 |
| petN   | 90                 | 90                 | 90                   | 90                 | 90                  | 90              | 90               | 90                 | 90                  | -                | 90              | 90                  | 90                  | 90                | 90                 |

|       |      |      |      |      |      |      |      |      |      |      |      |      |      |      |      |
|-------|------|------|------|------|------|------|------|------|------|------|------|------|------|------|------|
| psaA  | 2253 | 2253 | 2253 | 2253 | 2253 | 2253 | 2253 | 2253 | 2253 | 2253 | 2253 | 2253 | -    | 2253 | 2253 |
| psaB  | 2205 | 2205 | 2205 | 2205 | 2205 | 2205 | 2205 | 2205 | 2205 | 2205 | 2205 | 2205 | -    | 2205 | 2205 |
| psaC  | 246  | 246  | 246  | 246  | 246  | 246  | 246  | 246  | 246  | 246  | 246  | 246  | -    | 246  | 246  |
| psaI  | 111  | 114  | -    | 111  | 111  | 111  | 111  | 111  | 111  | -    | 111  | 111  | 111  | 114  | 111  |
| psaJ  | 135  | 135  | 129  | 135  | 135  | 135  | 135  | 135  | 129  | -    | 129  | 135  | 135  | 135  | 132  |
| psbA  | 1062 | 1062 | 1053 | 1062 | 1062 | 1062 | 1062 | 1062 | 1062 | 1062 | 1062 | 1062 | 1062 | 1062 | 1062 |
| psbB  | 1527 | 1527 | 1527 | 1527 | 1527 | 1527 | 1527 | 1527 | 1527 | 1527 | 1527 | 1527 | 1527 | 1527 | 1527 |
| psbC  | 1422 | 1422 | 1422 | 1386 | 1422 | 1422 | 1380 | 1422 | 1422 | 1422 | 1422 | 1422 | 1422 | 1422 | 1422 |
| psbD  | 1062 | 1062 | 1062 | 1062 | 1062 | 1062 | 1008 | 1062 | 1062 | 1062 | 1062 | 1062 | 1062 | 1062 | 1062 |
| psbE  | 252  | 252  | 252  | 252  | 252  | 252  | 252  | 252  | 252  | 252  | 252  | 252  | 252  | 252  | 252  |
| psbF  | 120  | 120  | 120  | 120  | 120  | 120  | 120  | 120  | 120  | 120  | 120  | 120  | 120  | 120  | 120  |
| psbH  | 222  | 222  | 222  | 222  | 222  | 222  | 228  | 222  | 222  | 231  | 228  | 222  | 222  | 225  | 240  |
| psbI  | 111  | 111  | 111  | 111  | 162  | 111  | 162  | 111  | 111  | 111  | 111  | 111  | 111  | 111  | 111  |
| psbJ  | 123  | 123  | 123  | 123  | 123  | 123  | 123  | 123  | 123  | -    | 123  | 123  | 123  | 123  | 123  |
| psbK  | 186  | 186  | 186  | 180  | 180  | 186  | 177  | 186  | 186  | 186  | 180  | 180  | 186  | 180  | 186  |
| psbL  | 117  | 117  | 117  | 117  | 117  | 117  | 117  | 117  | 117  | -    | 117  | 117  | 117  | 117  | 117  |
| psbM  | 105  | 105  | -    | 105  | 105  | 105  | 105  | 105  | 105  | 207  | 114  | 105  | 105  | 105  | 105  |
| psbN  | 132  | 132  | 132  | 132  | 132  | 132  | 132  | 132  | 132  | 294  | 132  | 132  | 132  | 132  | 132  |
| psbT  | 102  | 102  | 108  | 108  | 117  | 117  | 108  | 108  | 102  | -    | 108  | 108  | 108  | 108  | 108  |
| rbcL  | 1428 | 1440 | 1428 | 1428 | 1428 | 1428 | 1428 | 1431 | 1464 | 1455 | 1428 | 1428 | 1464 | 1428 | 1428 |
| rpl14 | 369  | 369  | 369  | 369  | 369  | 369  | 369  | 369  | 369  | 372  | 369  | 369  | 369  | 369  | 369  |
| rpl16 | 459  | 408  | 408  | 408  | 408  | 408  | 417  | 408  | 411  | 414  | 405  | 405  | 408  | 408  | 408  |
| rpl2  | 825  | 825  | 830  | 822  | 822  | 822  | 828  | 819  | 816  | 315  | 831  | 822  | 822  | 819  | 825  |
| rpl20 | 354  | 354  | 360  | 354  | 354  | 348  | 348  | 354  | 354  | -    | 360  | 354  | 354  | 354  | 354  |
| rpl22 | 546  | 483  | 375  | 429  | -    | 378  | 393  | -    | 390  | 450  | 429  | -    | 360  | 426  | 489  |
| rpl23 | 282  | 282  | 288  | 282  | -    | 282  | 81   | 282  | 282  | 282  | 276  | 291  | 282  | 282  | 282  |
| rpl32 | -    | 159  | 174  | 174  | 174  | 159  | 210  | 174  | 174  | 180  | 213  | 174  | 174  | 159  | 174  |
| rpl33 | 207  | 201  | 207  | 201  | 201  | 207  | 201  | 201  | 201  | 201  | 207  | 201  | 201  | 201  | 201  |
| rpl36 | 114  | 114  | 114  | 114  | 114  | 114  | 114  | 114  | 114  | -    | 114  | 114  | 114  | 114  | 114  |
| rpoA  | 1050 | 990  | 1005 | 1014 | 1020 | 1026 | 1023 | 1014 | 1020 | 1014 | 1011 | 1020 | 1014 | 981  | 996  |

|       |      |      |      |      |      |      |      |      |      |      |      |      |      |      |      |
|-------|------|------|------|------|------|------|------|------|------|------|------|------|------|------|------|
| rpoB  | 3213 | 3219 | 3219 | 3213 | 3234 | 3216 | 3219 | 3213 | 3225 | 3228 | 3231 | 3183 | 3276 | 3213 | 3213 |
| rpoC1 | 2043 | 2043 | 2043 | 2043 | 2052 | 2076 | 2055 | 2046 | 2061 | 2049 | 2091 | 2052 | 2043 | 2052 | 2049 |
| rpoC2 | 4146 | 4131 | 4110 | 4173 | 4158 | 4197 | 4110 | 4149 | 4095 | 4542 | 3657 | 4167 | 4167 | 4107 | 4185 |
| rps11 | 417  | 417  | 417  | 417  | 393  | 417  | 393  | 417  | 417  | 432  | 393  | 393  | 417  | 417  | 417  |
| rps12 | 372  | 372  | 372  | 381  | 357  | 372  | 369  | 372  | 369  | -    | 372  | 372  | 372  | 372  | 372  |
| rps14 | 303  | 303  | 303  | 303  | 303  | 303  | 303  | 303  | 303  | 312  | 300  | 303  | 303  | 303  | 303  |
| rps15 | 264  | 267  | 264  | 276  | 267  | 264  | 267  | 273  | 273  | 273  | 267  | 267  | 276  | 273  | 267  |
| rps16 | 261  | 240  | 237  | 261  | 270  | 228  | 231  | 261  | 252  | -    | -    | 270  | 285  | 270  | 276  |
| rps18 | 345  | 306  | 306  | 306  | 306  | 306  | 252  | 306  | 306  | 492  | 282  | 306  | 306  | 303  | 306  |
| rps19 | 279  | 279  | 279  | 279  | 279  | 279  | 279  | 279  | 279  | 282  | 279  | 279  | 279  | 279  | 279  |
| rps2  | 711  | 711  | 711  | 711  | 711  | 711  | 699  | 711  | 711  | 711  | 705  | 711  | 711  | 711  | 711  |
| rps3  | 669  | 657  | 657  | 657  | 663  | 657  | 657  | 660  | 657  | 720  | 657  | 663  | 657  | 657  | 657  |
| rps4  | 600  | 606  | 606  | 606  | 606  | 606  | 612  | 606  | 606  | 606  | 606  | 606  | 606  | 606  | 606  |
| rps7  | 468  | 468  | 468  | 468  | 468  | 468  | 468  | 468  | 468  | 471  | 468  | 468  | 468  | 468  | 468  |
| rps8  | 405  | 405  | 399  | 399  | 399  | 399  | 417  | 399  | 399  | 411  | 399  | 399  | 396  | 405  | 405  |
| yef3  | 507  | 507  | 507  | 507  | 507  | 507  | 513  | 507  | 507  | -    | 513  | 507  | 507  | 507  | 507  |
| yef4  | 555  | 555  | 708  | 555  | 555  | 555  | 555  | 555  | 555  | 558  | 555  | 555  | 555  | 555  | 561  |

367  
368

369 **Supplementary Table 15. Data on the previous sequenced 211 species used during**  
 370 **the phylogenetic tree analysis.**

| Order        | Family        | Species                        | Database                                                                                                                                                | Version                            | Genbank<br>Accession |
|--------------|---------------|--------------------------------|---------------------------------------------------------------------------------------------------------------------------------------------------------|------------------------------------|----------------------|
| Alismatales  | Araceae       | <i>Spirodela polyrhiza</i>     | NCBI                                                                                                                                                    | ASM198140v1                        | GCA_001981405.1      |
| Alismatales  | Lemnaceae     | <i>Lemna minor</i>             | CoGe database                                                                                                                                           | id 27408                           | -                    |
| Alismatales  | Zosteraceae   | <i>Zostera marina</i>          | NCBI                                                                                                                                                    | Zosma_marina.v.2.1                 | GCA_001185155.1      |
|              |               |                                | Seagrass Zmu Genome                                                                                                                                     |                                    |                      |
| Alismatales  | Zosteraceae   | <i>Zostera muelleri</i>        | ( <a href="http://appliedbioinformatics.com.au/index.php/Sea-grass_Zmu_Genome">http://appliedbioinformatics.com.au/index.php/Sea-grass_Zmu_Genome</a> ) | Zostera muelleri                   | -                    |
| Amborellales | Amborellaceae | <i>Amborella trichopoda</i>    | NCBI                                                                                                                                                    | AMTR1.0                            | GCA_000471905.1      |
| Apiales      | Apiaceae      | <i>Daucus carota</i>           | NCBI                                                                                                                                                    | ASM162521v1                        | GCA_001625215.1      |
|              |               |                                | Panax notoginseng                                                                                                                                       |                                    |                      |
| Apiales      | Araliaceae    | <i>Panax notoginseng</i>       | ( <a href="http://www.plantkingdomdb.com/panax_notoginseng/data/">http://www.plantkingdomdb.com/panax_notoginseng/data/</a> )                           | Panax notoginseng                  | -                    |
| Arecales     | Arecaceae     | <i>Elaeis guineensis</i>       | NCBI                                                                                                                                                    | EG5                                | GCA_000442705.1      |
| Arecales     | Arecaceae     | <i>Phoenix dactylifera</i>     | NCBI                                                                                                                                                    | DPV01                              | GCA_000413155.1      |
| Asparagales  | Asparagaceae  | <i>Asparagus officinalis</i>   | NCBI                                                                                                                                                    | Aspof.V1                           | GCA_001876935.1      |
| Asparagales  | Orchidaceae   | <i>Dendrobium catenatum</i>    | NCBI                                                                                                                                                    | ASM160598v2                        | GCA_001605985.2      |
|              |               |                                | Herbal Medicine Omics Database                                                                                                                          |                                    |                      |
| Asparagales  | Orchidaceae   | <i>Dendrobium officinale</i>   | ( <a href="ftp://202.203.187.112:2222/genome/dendrobe/">ftp://202.203.187.112:2222/genome/dendrobe/</a> )                                               | Dendrobium officinale              | -                    |
| Asparagales  | Orchidaceae   | <i>Phalaenopsis equestris</i>  | NCBI                                                                                                                                                    | ASM126359v1                        | GCA_001263595.1      |
| Asterales    | Asteraceae    | <i>Erigeron breviscapus</i>    | GigaDB ( <a href="http://dx.doi.org/10.5524/100290">http://dx.doi.org/10.5524/100290</a> )                                                              | Erigeron breviscapus               | -                    |
| Asterales    | Asteraceae    | <i>Helianthus annuus</i>       | NCBI                                                                                                                                                    | HanXRQr1.0                         | GCA_002127325.1      |
| Asterales    | Asteraceae    | <i>Lactuca sativa</i>          | NCBI                                                                                                                                                    | Lsat_Salinas_v7                    | GCA_002870075.1      |
| Brassicales  | Brassicaceae  | <i>Aethionema arabicum</i>     | NCBI                                                                                                                                                    | VEGI_AA_v_1.0                      | GCA_000411095.1      |
| Brassicales  | Brassicaceae  | <i>Arabidopsis halleri</i>     | NCBI                                                                                                                                                    | Ahal_1.0                           | GCA_000523005.1      |
| Brassicales  | Brassicaceae  | <i>Arabidopsis lyrata</i>      | NCBI                                                                                                                                                    | v.1.0                              | GCA_000004255.1      |
| Brassicales  | Brassicaceae  | <i>Arabidopsis thaliana</i>    | NCBI                                                                                                                                                    | TAIR10.1                           | GCA_000001735.2      |
| Brassicales  | Brassicaceae  | <i>Arabis alpina</i>           | NCBI                                                                                                                                                    | MPIPZ.v5                           | GCA_900128785.1      |
| Brassicales  | Brassicaceae  | <i>Barbarea vulgaris</i>       | NCBI                                                                                                                                                    | ASM192098v1                        | GCA_001920985.1      |
| Brassicales  | Brassicaceae  | <i>Boechera stricta</i>        | NCBI                                                                                                                                                    | Bstricta_278_v1                    | GCA_002079875.1      |
|              |               |                                | Brassica juncea_var_tumida_T8                                                                                                                           |                                    |                      |
| Brassicales  | Brassicaceae  | <i>Brassica juncea</i>         | NCBI                                                                                                                                                    | 4-66_v1                            | GCA_001687265.1      |
| Brassicales  | Brassicaceae  | <i>Brassica napus</i>          | NCBI                                                                                                                                                    | Bra_napus_v2.0                     | GCA_000686985.2      |
| Brassicales  | Brassicaceae  | <i>Brassica nigra</i>          | NCBI                                                                                                                                                    | ASM168289v1                        | GCA_001682895.1      |
| Brassicales  | Brassicaceae  | <i>Brassica oleracea</i>       | NCBI                                                                                                                                                    | BOL                                | GCA_000695525.1      |
| Brassicales  | Brassicaceae  | <i>Brassica rapa</i>           | NCBI                                                                                                                                                    | ASM30998v2                         | GCA_000309985.2      |
| Brassicales  | Brassicaceae  | <i>Camelina sativa</i>         | NCBI                                                                                                                                                    | Cs                                 | GCA_000633955.1      |
|              |               |                                | C_bursa_pastoris_nuclear_genome_v1                                                                                                                      |                                    |                      |
| Brassicales  | Brassicaceae  | <i>Capsella bursa-pastoris</i> | NCBI                                                                                                                                                    | C_bursa_pastoris_nuclear_genome_v1 | GCA_001974645.1      |

|                |                 |                                                             |                                                                                                                                             |                       |                 |
|----------------|-----------------|-------------------------------------------------------------|---------------------------------------------------------------------------------------------------------------------------------------------|-----------------------|-----------------|
| Brassicales    | Brassicaceae    | <i>Capsella grandiflora</i>                                 | JGI12                                                                                                                                       | V1.1                  | -               |
| Brassicales    | Brassicaceae    | <i>Capsella rubella</i>                                     | NCBI                                                                                                                                        | Caprub1_0             | GCA_000375325.1 |
| Brassicales    | Brassicaceae    | <i>Cardamine hirsuta</i>                                    | Cardamine hirsuta genetic and genomic<br>( <a href="http://chi.mpipz.mpg.de/assembly.html">http://chi.mpipz.mpg.de/assembly.html</a> )      | v1.0                  | -               |
| Brassicales    | Brassicaceae    | <i>Leavenworthia alabamica</i>                              | NCBI                                                                                                                                        | VEGI_LA_v_1.0         | GCA_000411055.1 |
| Brassicales    | Brassicaceae    | <i>Lepidium meyenii</i>                                     | Maca Genome Hub                                                                                                                             | V1.0                  | -               |
| Brassicales    | Brassicaceae    | <i>Raphanus raphanistrum</i>                                | NCBI                                                                                                                                        | ASM76984v1            | GCA_000769845.1 |
| Brassicales    | Brassicaceae    | <i>Raphanus sativus</i>                                     | NCBI                                                                                                                                        | Rs1.0                 | GCA_000801105.2 |
| Brassicales    | Brassicaceae    | <i>Sisymbrium irio</i>                                      | NCBI                                                                                                                                        | VEGI_SI_v_1.0         | GCA_000411075.1 |
| Brassicales    | Brassicaceae    | <i>Thellungiella halophila</i>   <i>Eutrema salsugineum</i> | NCBI                                                                                                                                        | Eutsalg1_0            | GCA_000478725.1 |
| Brassicales    | Brassicaceae    | <i>Thellungiella parvula</i>   <i>Schrenkiella parvula</i>  | NCBI                                                                                                                                        | Eutrema_parvulum_v01  | GCA_000218505.1 |
| Brassicales    | Brassicaceae    | <i>Thlaspi arvense</i>                                      | NCBI                                                                                                                                        | T_arvense_v1          | GCA_000956625.1 |
| Brassicales    | Caricaceae      | <i>Carica papaya</i>                                        | NCBI                                                                                                                                        | ASM131004v1           | GCA_001310045.1 |
| Brassicales    | Cleomaceae      | <i>Tarenaya hassleriana</i>                                 | NCBI                                                                                                                                        | ASM46358v1            | GCA_000463585.1 |
| Brassicales    | Moringaceae     | <i>Moringa oleifera</i>                                     | Herbal Medicine Omics Database<br>( <a href="ftp://202.203.187.112:2222/genome/dendrobe/">ftp://202.203.187.112:2222/genome/dendrobe/</a> ) | Moringa oleifera      | -               |
| Caryophyllales | Amaranthaceae   | <i>Amaranthus hypochondriacus</i>                           | NCBI                                                                                                                                        | AHP 1.0               | GCA_000753965.1 |
| Caryophyllales | Amaranthaceae   | <i>Beta vulgaris</i>                                        | Ensembl Plants v42                                                                                                                          | RefBeet-1.2.2         | GCA_000511025.2 |
| Caryophyllales | Amaranthaceae   | <i>Chenopodium quinoa</i>                                   | NCBI                                                                                                                                        | ASM168347v1           | GCA_001683475.1 |
| Caryophyllales | Amaranthaceae   | <i>Spinacia oleracea</i>                                    | NCBI                                                                                                                                        | ASM200726v1           | GCA_002007265.1 |
| Caryophyllales | Caryophyllaceae | <i>Dianthus caryophyllus</i>                                | NCBI                                                                                                                                        | DCA_r1.0              | GCA_000512335.1 |
| Caryophyllales | Polygonaceae    | <i>Fagopyrum esculentum</i>                                 | NCBI                                                                                                                                        | FES_r1.0              | GCA_001661195.1 |
| Caryophyllales | Polygonaceae    | <i>Fagopyrum tataricum</i>                                  | NCBI                                                                                                                                        | Ft1.0                 | GCA_002319775.1 |
| Cornales       | Nyssaceae       | <i>Camptotheca acuminata</i>                                | Medicinal Plant Genomics Resource<br>( <a href="http://medicinalplantgenomics.msu.edu">http://medicinalplantgenomics.msu.edu</a> )          | Camptotheca acuminata | -               |
| Cucurbitales   | Cucurbitaceae   | <i>Citrullus lanatus</i>                                    | NCBI                                                                                                                                        | ClLa_1.0              | GCA_000238415.1 |
| Cucurbitales   | Cucurbitaceae   | <i>Cucumis melo</i>                                         | NCBI                                                                                                                                        | ASM31304v1            | GCA_000313045.1 |
| Cucurbitales   | Cucurbitaceae   | <i>Cucumis sativus</i>                                      | NCBI                                                                                                                                        | ASM407v2              | GCA_000004075.2 |
| Cucurbitales   | Cucurbitaceae   | <i>Cucurbita maxima</i>                                     | NCBI                                                                                                                                        | Cmax_1.0              | GCA_002738345.1 |
| Cucurbitales   | Cucurbitaceae   | <i>Cucurbita moschata</i>                                   | NCBI                                                                                                                                        | Cmos_1.0              | GCA_002738365.1 |
| Ericales       | Actinidiaceae   | <i>Actinidia chinensis</i>                                  | NCBI                                                                                                                                        | Kiwifruit_v1          | GCA_000467755.1 |
| Ericales       | Ericaceae       | <i>Rhododendron delavayi</i>                                | GigaDB ( <a href="http://dx.doi.org/10.5524/100331">http://dx.doi.org/10.5524/100331</a> )                                                  | Rhododendron delavayi | -               |

|             |                  |                                                      |                                                                                                                                                             |                              |                 |
|-------------|------------------|------------------------------------------------------|-------------------------------------------------------------------------------------------------------------------------------------------------------------|------------------------------|-----------------|
| Ericales    | Ericaceae        | <i>Vaccinium macrocarpon</i>                         | NCBI                                                                                                                                                        | ASM77533v2                   | GCA_000775335.2 |
| Ericales    | Primulaceae      | <i>Primula veris</i>                                 | NCBI                                                                                                                                                        | ASM78844v1                   | GCA_000788445.1 |
| Ericales    | Theaceae         | <i>Camellia sinensis</i>                             | NCBI                                                                                                                                                        | AHAU_CSS_2                   | GCA_004153795.2 |
| Fabales     | Fabaceae         | <i>Arachis duranensis</i>                            | NCBI                                                                                                                                                        | Aradu1.1                     | GCA_000817695.2 |
| Fabales     | Fabaceae         | <i>Arachis ipaensis</i>                              | NCBI                                                                                                                                                        | Araip1.1                     | GCA_000816755.2 |
| Fabales     | Fabaceae         | <i>Cajanus cajan</i>                                 | NCBI                                                                                                                                                        | C.cajan_V1.0                 | GCA_000340665.1 |
| Fabales     | Fabaceae         | <i>Cicer arietinum</i>                               | NCBI                                                                                                                                                        | ASM33114v1                   | GCA_000331145.1 |
| Fabales     | Fabaceae         | <i>Glycine max</i>                                   | NCBI                                                                                                                                                        | Glycine_max_v2.1             | GCA_000004515.4 |
| Fabales     | Fabaceae         | <i>Glycine soja</i>                                  | NCBI                                                                                                                                                        | glyso.PI483463.gmm1          | GCA_002907465.1 |
| Fabales     | Fabaceae         | <i>Glycyrrhiza uralensis</i>                         | Glycyrrhiza uralensis GDB ( <a href="http://ngs-data-archive.psc.riken.jp/Gur-genome/">http://ngs-data-archive.psc.riken.jp/Gur-genome/</a> )               | v1.0                         | -               |
| Fabales     | Fabaceae         | <i>Lotus japonicus</i>                               | NCBI                                                                                                                                                        | Lj3.0                        | GCA_000181115.2 |
| Fabales     | Fabaceae         | <i>Lupinus angustifolius</i>                         | NCBI                                                                                                                                                        | LupAngTanjil_v1.0            | GCA_001865875.1 |
| Fabales     | Fabaceae         | <i>Medicago truncatula</i>                           | NCBI                                                                                                                                                        | MedtrA17_4.0                 | GCA_000219495.2 |
| Fabales     | Fabaceae         | <i>Phaseolus vulgaris</i>                            | NCBI                                                                                                                                                        | PhaVulg1_0                   | GCA_000499845.1 |
| Fabales     | Fabaceae         | <i>Trifolium pratense</i>                            | NCBI                                                                                                                                                        | Trifolium pratense genome v3 | GCA_900292005.1 |
| Fabales     | Fabaceae         | <i>Trifolium subterraneum</i>                        | NCBI                                                                                                                                                        | TSUd_r1.1                    | GCA_001742945.1 |
| Fabales     | Fabaceae         | <i>Vigna angularis</i>                               | NCBI                                                                                                                                                        | Vigan1.1                     | GCA_001190045.1 |
| Fabales     | Fabaceae         | <i>Vigna radiata</i>                                 | NCBI                                                                                                                                                        | Vradiata_ver6                | GCA_000741045.2 |
| Fabales     | Fabaceae         | <i>Vigna unguiculata</i>                             | NCBI                                                                                                                                                        | ASM411807v1                  | GCA_004118075.1 |
| Fagales     | Betulaceae       | <i>Betula pendula</i>                                | NCBI                                                                                                                                                        | Bpev01                       | GCA_900184695.1 |
| Fagales     | Fagaceae         | <i>Castanea mollissima</i>                           | NCBI                                                                                                                                                        | ASM76360v1                   | GCA_000763605.1 |
| Fagales     | Fagaceae         | <i>Quercus lobata</i>                                | NCBI                                                                                                                                                        | ValleyOak3.0                 | GCA_001633185.2 |
| Fagales     | Juglandaceae     | <i>Juglans regia</i>                                 | NCBI                                                                                                                                                        | wgs.5d                       | GCA_001411555.1 |
| Gentianales | Apocynaceae      | <i>Catharanthus roseus</i>                           | NCBI                                                                                                                                                        | ASM94934v1                   | GCA_000949345.1 |
| Gentianales | Rubiaceae        | <i>Coffea canephora</i>                              | NCBI                                                                                                                                                        | AUK_PRJEB4211_v1             | GCA_900059795.1 |
| Ginkgoales  | Ginkgoaceae      | <i>Ginkgo biloba</i>                                 | PLAZA v4.0                                                                                                                                                  | -                            | -               |
| Lamiales    | Gesneriaceae     | <i>Doroceras hygrometricum</i>                       | NCBI                                                                                                                                                        | Boea_hygrometrica.v1         | GCA_001598015.1 |
| Lamiales    | Lamiaceae        | <i>Salvia miltiorrhiza</i>                           | National Data Center of Traditional Chinese Medicine of China ( <a href="http://www.ndctcm.org/shujukujieshao/">http://www.ndctcm.org/shujukujieshao/</a> ) | Salvia miltiorrhiza          | -               |
| Lamiales    | Lentibulariaceae | <i>Gentisea aurea</i>                                | NCBI                                                                                                                                                        | GenAur_1.0                   | GCA_000441915.1 |
| Lamiales    | Lentibulariaceae | <i>Utricularia gibba</i>                             | NCBI                                                                                                                                                        | U_gibba_v2                   | GCA_002189035.1 |
| Lamiales    | Oleaceae         | <i>Fraxinus excelsior</i>                            | NCBI                                                                                                                                                        | BATG-0.5                     | GCA_900149125.1 |
| Lamiales    | Oleaceae         | <i>Olea europaea</i>                                 | NCBI                                                                                                                                                        | O_europaea_v1                | GCA_002742605.1 |
| Lamiales    | Pedaliaceae      | <i>Sesamum indicum</i>                               | NCBI                                                                                                                                                        | S_indicum_v1.0               | GCA_000512975.1 |
| Lamiales    | Phrymaceae       | <i>Mimulus guttatus</i> / <i>Erythranthe guttata</i> | NCBI                                                                                                                                                        | Mimgu1_0                     | GCA_000504015.1 |

|              |               |                                             |                                                                                            |                              |                                                                                                   |
|--------------|---------------|---------------------------------------------|--------------------------------------------------------------------------------------------|------------------------------|---------------------------------------------------------------------------------------------------|
| Laurales     | Lauraceae     | <i>Cinnamomum</i><br><i>kanehirae</i>       | NCBI                                                                                       | ASBRC_Ckan_1.0               | GCA_003546025.1                                                                                   |
| magnoliales  | magnoliaceae  | <i>Liriodendron chinense</i>                | NCBI                                                                                       | NJFU_Lchi_2.0                | GCA_003013855.2                                                                                   |
| Malpighiales | Euphorbiaceae | <i>Hevea brasiliensis</i>                   | NCBI                                                                                       | ASM165405v1                  | GCA_001654055.1                                                                                   |
| Malpighiales | Euphorbiaceae | <i>Jatropha curcas</i>                      | NCBI                                                                                       | JatCur_1.0                   | GCA_000696525.1                                                                                   |
| Malpighiales | Euphorbiaceae | <i>Manihot esculenta</i>                    | NCBI                                                                                       | Manihot esculenta v6         | GCA_001659605.1                                                                                   |
| Malpighiales | Euphorbiaceae | <i>Ricinus communis</i>                     | NCBI                                                                                       | JCVI_RCG_1.1                 | GCA_000151685.2                                                                                   |
| Malpighiales | Linaceae      | <i>Linum usitatissimum</i>                  | NCBI                                                                                       | ASM22429v2                   | GCA_000224295.2                                                                                   |
| Malpighiales | Salicaceae    | <i>Populus deltoides</i>                    | JGI12                                                                                      | Populus deltoides WV94 v2.1  | -                                                                                                 |
| Malpighiales | Salicaceae    | <i>Populus euphratica</i>                   | NCBI                                                                                       | PopEup_1.0                   | NC_024747.1                                                                                       |
| Malpighiales | Salicaceae    | <i>Populus pruinosa</i>                     | GigaDB ( <a href="http://dx.doi.org/10.5524/100319">http://dx.doi.org/10.5524/100319</a> ) | Populus pruinosa             | -                                                                                                 |
| Malpighiales | Salicaceae    | <i>Populus tremula</i>                      | v3 PopGenIE ( <a href="http://popgenie.org/">http://popgenie.org/</a> )                    | v1.1                         | -                                                                                                 |
| Malpighiales | Salicaceae    | <i>Populus tremuloides</i>                  | v3 PopGenIE ( <a href="http://popgenie.org/">http://popgenie.org/</a> )                    | v1.1                         | -                                                                                                 |
| Malpighiales | Salicaceae    | <i>Populus trichocarpa</i>                  | NCBI                                                                                       | Pop_tri_v3                   | GCA_000002775.3                                                                                   |
| Malpighiales | Salicaceae    | <i>Salix purpurea</i>                       | JGI12                                                                                      | Salix purpurea v1.0          | -                                                                                                 |
|              |               |                                             |                                                                                            |                              | <a href="https://gold.jgi.doe.gov/project?id=96061">https://gold.jgi.doe.gov/project?id=96061</a> |
| Malpighiales | Salicaceae    | <i>Salix suchowensis</i>                    | JGI GOLD                                                                                   | Gp0096061                    | gov/project?id=96061                                                                              |
| Malvales     | Malvaceae     | <i>Corchorus capsularis</i>                 | NCBI                                                                                       | CCACVL1_1.0                  | GCA_001974805.1                                                                                   |
| Malvales     | Malvaceae     | <i>Corchorus olitorius</i>                  | NCBI                                                                                       | COLO4_1.0                    | GCA_001974825.1                                                                                   |
| Malvales     | Malvaceae     | <i>Gossypium arboreum</i>                   | NCBI                                                                                       | Gossypium_arboreum_v1.0      | GCA_000612285.2                                                                                   |
| Malvales     | Malvaceae     | <i>Gossypium</i><br><i>barbadense</i>       | NCBI                                                                                       | GbV1.0                       | GCA_001856525.1                                                                                   |
| Malvales     | Malvaceae     | <i>Gossypium</i><br><i>barbadense AA/DD</i> | COTTONGEN ( <a href="https://www.cottongen.org/">https://www.cottongen.org/</a> )          | 3-79_HAU v1                  | -                                                                                                 |
| Malvales     | Malvaceae     | <i>Gossypium hirsutum</i>                   | NCBI                                                                                       | ASM250434v1                  | GCA_002504345.1                                                                                   |
| Malvales     | Malvaceae     | <i>Gossypium raimondii</i>                  | NCBI                                                                                       | Gr_v1.0                      | GCA_000331045.1                                                                                   |
| Malvales     | Malvaceae     | <i>Theobroma cacao</i>                      | NCBI                                                                                       | Criollo_cocoa_genome_V2      | GCA_000208745.2                                                                                   |
| Malvales     | Sterculiaceae | <i>Herrania umbratica</i>                   | NCBI                                                                                       | ASM216827v2                  | GCA_002168275.2                                                                                   |
| Myrtales     | Lythraceae    | <i>Punica granatum</i>                      | NCBI                                                                                       | ASM220158v1                  | GCA_002201585.1                                                                                   |
| Myrtales     | Myrtaceae     | <i>Eucalyptus grandis</i>                   | NCBI                                                                                       | Egrandis1_0                  | GCA_000612305.1                                                                                   |
| Oxalidales   | Cephalotaceae | <i>Cephalotus follicularis</i>              | NCBI                                                                                       | Cfol_1.0                     | GCA_001972305.1                                                                                   |
| Pandanales   | Velloziaceae  | <i>Xerophyta viscosa</i>                    | NCBI                                                                                       | ASM207613v1                  | GCA_002076135.1                                                                                   |
| Pinales      | Pinaceae      | <i>Picea abies</i>                          | NCBI                                                                                       | Pabies01                     | GCA_900067695.1                                                                                   |
| Poales       | Bromeliaceae  | <i>Ananas comosus</i>                       | NCBI                                                                                       | ASM154086v1                  | GCA_001540865.1                                                                                   |
| Poales       | Poaceae       | <i>Aegilops tauschii</i>                    | NCBI                                                                                       | ASM34733v1                   | GCA_000347335.1                                                                                   |
| Poales       | Poaceae       | <i>Brachypodium</i><br><i>distachyon</i>    | NCBI                                                                                       | Brachypodium_distachyon_v3.0 | GCA_000005505.4                                                                                   |
| Poales       | Poaceae       | <i>Brachypodium stacei</i>                  | JGI12                                                                                      | Brachypodium stacei v1.1     |                                                                                                   |
| Poales       | Poaceae       | <i>Brachypodium</i><br><i>sylvaticum</i>    | JGI12                                                                                      | Brachypodium sylvaticum v1.1 |                                                                                                   |
| Poales       | Poaceae       | <i>Dichantherium</i><br><i>oligosanthes</i> | NCBI                                                                                       | ASM163321v2                  | GCA_001633215.2                                                                                   |
| Poales       | Poaceae       | <i>Eragrostis tef</i>                       | NCBI                                                                                       | ASM97063v1                   | GCA_000970635.1                                                                                   |



|              |               |                                   |                                                                                                                                          |                            |                 |
|--------------|---------------|-----------------------------------|------------------------------------------------------------------------------------------------------------------------------------------|----------------------------|-----------------|
| Poales       | Poaceae       | <i>Hordeum vulgare</i>            | NCBI                                                                                                                                     | Hulless_Barley_ass.V2      | GCA_004114815.1 |
| Poales       | Poaceae       | <i>Leersia perrieri</i>           | NCBI                                                                                                                                     | Lperr_V1.4                 | GCA_000325765.3 |
| Poales       | Poaceae       | <i>Lolium perenne</i>             | NCBI                                                                                                                                     | ASM173568v1                | GCA_001735685.1 |
| Poales       | Poaceae       | <i>Oropetium thomaeum</i>         | NCBI                                                                                                                                     | Oropetium_genomic_20141112 | GCA_001182835.1 |
| Poales       | Poaceae       | <i>Oryza barthii</i>              | NCBI                                                                                                                                     | O.barthii_v1.3             | GCA_000182155.3 |
| Poales       | Poaceae       | <i>Oryza brachyantha</i>          | NCBI                                                                                                                                     | Oryza_brachyantha.v1.4b    | GCA_000231095.2 |
| Poales       | Poaceae       | <i>Oryza glaberrima</i>           | NCBI                                                                                                                                     | Oryza_glaberrima_V1        | GCA_000147395.2 |
| Poales       | Poaceae       | <i>Oryza glumaepatula</i>         | NCBI                                                                                                                                     | Oryza_glumaepatula_v1.5    | GCA_000576495.1 |
| Poales       | Poaceae       | <i>Oryza indica</i>               | Ensembl Plants v42                                                                                                                       | ASM465v1                   | -               |
| Poales       | Poaceae       | <i>Oryza longistaminata</i>       | NCBI                                                                                                                                     | ASM151433v2                | GCA_001514335.2 |
| Poales       | Poaceae       | <i>Oryza meridionalis</i>         | NCBI                                                                                                                                     | Oryza_meridionalis_v1.3    | GCA_000338895.2 |
| Poales       | Poaceae       | <i>Oryza nivara</i>               | NCBI                                                                                                                                     | Oryza_nivara_v1.0          | GCA_000576065.1 |
| Poales       | Poaceae       | <i>Oryza punctata</i>             | NCBI                                                                                                                                     | Oryza_punctata_v1.2        | GCA_000573905.1 |
| Poales       | Poaceae       | <i>Oryza rufipogon</i>            | NCBI                                                                                                                                     | OR_W1943                   | GCA_000817225.1 |
| Poales       | Poaceae       | <i>Oryza sativa</i>               | NCBI                                                                                                                                     | IRGSP-1.0                  | GCA_001433935.1 |
| Poales       | Poaceae       | <i>Panicum hallii</i>             | NCBI                                                                                                                                     | PHallii_v3.1               | GCA_002211085.2 |
| Poales       | Poaceae       | <i>Panicum virgatum</i>           | JGI12                                                                                                                                    | Panicum_virgatum_v1.1      | -               |
| Poales       | Poaceae       | <i>Phyllostachys heterocyclus</i> | National Center For Gene Research<br>( <a href="http://server.ncgr.ac.cn/bamboo/down.php">http://server.ncgr.ac.cn/bamboo/down.php</a> ) | v1.0                       | -               |
| Poales       | Poaceae       | <i>Secale cereale</i>             | NCBI                                                                                                                                     | Rye_Lo7_WGS_contigs        | GCA_900079665.1 |
| Poales       | Poaceae       | <i>Setaria italica</i>            | NCBI                                                                                                                                     | Setaria_italica_v2.0       | GCA_000263155.2 |
| Poales       | Poaceae       | <i>Setaria viridis</i>            | NCBI                                                                                                                                     | Setaria_viridis_v2.0       | GCA_005286985.1 |
| Poales       | Poaceae       | <i>Sorghum bicolor</i>            | NCBI                                                                                                                                     | Sorghum_bicolor_NCBIv3     | GCA_000003195.3 |
| Poales       | Poaceae       | <i>Triticum aestivum</i>          | NCBI                                                                                                                                     | iwgs_refseqv1.0            | GCA_900519105.1 |
| Poales       | Poaceae       | <i>Triticum turgidum</i>          | NCBI                                                                                                                                     | WEWSeq v.1.0               | GCA_002162155.1 |
| Poales       | Poaceae       | <i>Triticum urartu</i>            | NCBI                                                                                                                                     | Tu2.0                      | GCA_003073215.1 |
| Poales       | Poaceae       | <i>Zea mays</i>                   | NCBI                                                                                                                                     | B73 RefGen_v4              | GCA_000005005.6 |
| Poales       | Poaceae       | <i>Zizania latifolia</i>          | NCBI                                                                                                                                     | Zizania_latifolia_v01      | GCA_000418225.1 |
| Poales       | Poaceae       | <i>Zoysia japonica</i>            | NCBI                                                                                                                                     | ASM160227v1                | GCA_001602275.1 |
| Poales       | Poaceae       | <i>Zoysia matrella</i>            | NCBI                                                                                                                                     | ASM160229v1                | GCA_001602295.1 |
| Poales       | Poaceae       | <i>Zoysia pacifica</i>            | NCBI                                                                                                                                     | ASM160231v1                | GCA_001602315.1 |
| Proteales    | Nelumbonaceae | <i>Nelumbo nucifera</i>           | NCBI                                                                                                                                     | ASM303368v1                | GCA_003033685.1 |
| Proteales    | Proteaceae    | <i>Macadamia integrifolia</i>     | NCBI                                                                                                                                     | Macadamia_Integrifolia_v2  | GCA_900631585.1 |
| Ranunculales | Papaveraceae  | <i>Macleaya cordata</i>           | NCBI                                                                                                                                     | MC_HNAU_1.0                | GCA_002174775.1 |
| Ranunculales | Ranunculaceae | <i>Aquilegia coerulea</i>         | NCBI                                                                                                                                     | Aquilegia_coerulea_v1      | GCA_002738505.1 |
| Rosales      | Cannabaceae   | <i>Humulus lupulus</i>            | NCBI                                                                                                                                     | hl_SW_version_1.0.fasta    | GCA_000831365.1 |
| Rosales      | Moraceae      | <i>Morus notabilis</i>            | NCBI                                                                                                                                     | ASM41409v2                 | GCA_000414095.2 |
| Rosales      | Rhamnaceae    | <i>Ziziphus jujuba</i>            | NCBI                                                                                                                                     | ZizJuj_1.1                 | GCA_000826755.1 |
| Rosales      | Rosaceae      | <i>Fragaria iinumae</i>           | NCBI                                                                                                                                     | FIL_r1.1                   | GCA_000511975.1 |
| Rosales      | Rosaceae      | <i>Fragaria nipponica</i>         | NCBI                                                                                                                                     | FNI_r1.1                   | GCA_000512025.1 |
| Rosales      | Rosaceae      | <i>Fragaria nubicola</i>          | NCBI                                                                                                                                     | FNU_r1.1                   | GCA_000511995.1 |
| Rosales      | Rosaceae      | <i>Fragaria orientalis</i>        | NCBI                                                                                                                                     | FOR_r1.1                   | GCA_000517285.1 |

|              |                    |                                      |                                                                                            |                                                                     |                                           |
|--------------|--------------------|--------------------------------------|--------------------------------------------------------------------------------------------|---------------------------------------------------------------------|-------------------------------------------|
| Rosales      | Rosaceae           | <i>Fragaria vesca</i>                | NCBI                                                                                       | FraVesHawaii_1.0                                                    | GCA_000184155.1                           |
| Rosales      | Rosaceae           | <i>Malus domestica</i>               | NCBI                                                                                       | ASM211411v1                                                         | GCA_002114115.1                           |
| Rosales      | Rosaceae           | <i>Prunus avium</i>                  | NCBI                                                                                       | PAV_r1.0                                                            | GCA_002207925.1                           |
| Rosales      | Rosaceae           | <i>Prunus mume</i>                   | NCBI                                                                                       | P.mume_V1.0                                                         | GCA_000346735.1                           |
| Rosales      | Rosaceae           | <i>Prunus persica</i>                | NCBI                                                                                       | Prunus_persica_NCBIv2                                               | GCA_000346465.2                           |
| Rosales      | Rosaceae           | <i>Pyrus bretschneideri</i>          | NCBI                                                                                       | Pbr_v1.0                                                            | GCA_000315295.1                           |
| Rosales      | Rosaceae           | <i>Rubus occidentalis</i>            | Genome Database for Rosaceae                                                               | Rubus occidentalis Whole<br>Genome Assembly v1.0 &<br>Annotation v1 | https://www.rosacea<br>e.org/analysis/200 |
| Sapindales   | Anacardiaceae      | <i>Anacardium<br/>occidentale</i>    | JGI12                                                                                      | v0.9                                                                | -                                         |
| Sapindales   | Meliaceae          | <i>Azadirachta indica</i>            | NCBI                                                                                       | AzaInd2.1                                                           | GCA_000439995.3                           |
| Sapindales   | Rutaceae           | <i>Atalantia buxifolia</i>           | CITRUS GENOME DATABASE                                                                     | Atalantia buxifolia                                                 | -                                         |
| Sapindales   | Rutaceae           | <i>Citrus clementina</i>             | NCBI                                                                                       | Citrus_clementina_v1.0                                              | GCA_000493195.1                           |
| Sapindales   | Rutaceae           | <i>Citrus grandis</i>                | NCBI                                                                                       | ASM200692v1                                                         | GCA_002006925.1                           |
| Sapindales   | Rutaceae           | <i>Citrus ichangensis</i>            | NCBI                                                                                       | ASM201397v2                                                         | GCA_002013975.2                           |
| Sapindales   | Rutaceae           | <i>Citrus medica</i>                 | NCBI                                                                                       | C_medica_denovo_2                                                   | GCA_002013955.2                           |
| Sapindales   | Rutaceae           | <i>Citrus sinensis</i>               | NCBI                                                                                       | Csi_valencia_1.0                                                    | GCA_000317415.1                           |
| Sapindales   | Sapindaceae        | <i>Dimocarpus longan</i>             | gigaDB ( <a href="http://dx.doi.org/10.5524/100276">http://dx.doi.org/10.5524/100276</a> ) | Erigeron breviscapus                                                | -                                         |
| Saxifragales | Crassulaceae       | <i>Kalanchoe<br/>fedtschenkoi</i>    | NCBI                                                                                       | K_fedtschenkoi_M2_v1                                                | GCA_002312845.1                           |
| Saxifragales | Crassulaceae       | <i>Kalanchoe laxiflora</i>           | JGI12                                                                                      | Kalanchoe laxiflora v1.1                                            | -                                         |
| Saxifragales | Crassulaceae       | <i>Rhodiola crenulata</i>            | GigaDB ( <a href="http://dx.doi.org/10.5524/100301">http://dx.doi.org/10.5524/100301</a> ) | Rhodiola crenulata                                                  | -                                         |
| Solanales    | Convolvulacea<br>e | <i>Ipomoea nil</i>                   | NCBI                                                                                       | Asagao_1.1                                                          | GCA_001879475.1                           |
| Solanales    | Convolvulacea<br>e | <i>Ipomoea trifida</i>               | NCBI                                                                                       | ASM357666v1                                                         | GCA_003576665.1                           |
| Solanales    | Solanaceae         | <i>Capsicum annuum</i>               | NCBI                                                                                       | Pepper Zunla 1 Ref_v1.0                                             | GCA_000710875.1                           |
| Solanales    | Solanaceae         | <i>Capsicum baccatum</i>             | NCBI                                                                                       | ASM227188v2                                                         | GCA_002271885.2                           |
| Solanales    | Solanaceae         | <i>Capsicum chinense</i>             | NCBI                                                                                       | ASM227189v2                                                         | GCA_002271895.2                           |
| Solanales    | Solanaceae         | <i>Nicotiana attenuata</i>           | NCBI                                                                                       | NIATTr2                                                             | GCA_001879085.1                           |
| Solanales    | Solanaceae         | <i>Nicotiana<br/>benthamiana</i>     | NCBI                                                                                       | Ni_ben                                                              | GCA_000723945.1                           |
| Solanales    | Solanaceae         | <i>Nicotiana obtusifolia</i>         | NCBI                                                                                       | NIOBT.version3                                                      | GCA_002018475.1                           |
| Solanales    | Solanaceae         | <i>Nicotiana sylvestris</i>          | NCBI                                                                                       | Nsyl                                                                | GCA_000393655.1                           |
| Solanales    | Solanaceae         | <i>Nicotiana tabacum</i>             | NCBI                                                                                       | Ntab-TN90                                                           | GCA_000715135.1                           |
| Solanales    | Solanaceae         | <i>Nicotiana<br/>tomentosiformis</i> | NCBI                                                                                       | Ntom_v01                                                            | GCA_000390325.2                           |
| Solanales    | Solanaceae         | <i>Petunia axillaris</i>             | Sol Genomics Network                                                                       | Petunia axillaris draft genome<br>sequence v1.6.2                   | -                                         |
| Solanales    | Solanaceae         | <i>Petunia inflata</i>               | Sol Genomics Network                                                                       | Petunia inflata draft genome<br>sequence v1.0.1                     | -                                         |
| Solanales    | Solanaceae         | <i>Solanum lycopersicum</i>          | NCBI                                                                                       | SL3.0                                                               | GCA_000188115.3                           |
| Solanales    | Solanaceae         | <i>Solanum melongena</i>             | Ensembl Plants v42                                                                         | SolTub_3.0                                                          | -                                         |

|              |            |                                     |                                                                                                                       |                      |                 |
|--------------|------------|-------------------------------------|-----------------------------------------------------------------------------------------------------------------------|----------------------|-----------------|
| Solanales    | Solanaceae | <i>Solanum pennellii</i>            | NCBI                                                                                                                  | SPENNV200            | GCA_001406875.2 |
| Solanales    | Solanaceae | <i>Solanum<br/>pimpinellifolium</i> | NCBI                                                                                                                  | KAUST_Spi-LA0480_1.0 | GCA_003660305.1 |
| Solanales    | Solanaceae | <i>Solanum tuberosum</i>            | NCBI                                                                                                                  | SolTub_3.0           | GCA_000226075.1 |
| Vitales      | Vitaceae   | <i>Vitis vinifera</i>               | NCBI                                                                                                                  | 12X                  | GCA_000003745.2 |
| Zingiberales | Musaceae   | <i>Musa acuminata</i>               | NCBI                                                                                                                  | ASM31385v2           | GCA_000313855.2 |
| Zingiberales | Musaceae   | <i>Musa balbisiana</i>              | Banana Genome Hub ( <a href="https://banana-genome-hub.southgreen.fr/">https://banana-genome-hub.southgreen.fr/</a> ) | Musa balbisiana      | -               |
| Zingiberales | Musaceae   | <i>Musa itinerans</i>               | NCBI                                                                                                                  | ASM164941v1          | GCA_001649415.1 |

371

372 **Supplementary Table 16. Gene ontology enrichment of the 1,139 unique gene**  
 373 **families (containing 3,390 genes) in Prickly waterlily based on the**  
 374 **hypergeometric test.**

| GO         | Type               | Go Terms                                                       | Number of enriched genes | Number of genes in background | Adjusted P-value |
|------------|--------------------|----------------------------------------------------------------|--------------------------|-------------------------------|------------------|
| GO:0000160 | biological_process | phosphorelay signal transduction system                        | 70                       | 145                           | 0.00E+00         |
| GO:0006355 | biological_process | regulation of transcription, DNA-templated                     | 163                      | 889                           | 0.00E+00         |
| GO:0007165 | biological_process | signal transduction                                            | 87                       | 295                           | 0.00E+00         |
| GO:0009889 | biological_process | regulation of biosynthetic process                             | 165                      | 905                           | 0.00E+00         |
| GO:0010468 | biological_process | regulation of gene expression                                  | 166                      | 923                           | 0.00E+00         |
| GO:0010556 | biological_process | regulation of macromolecule biosynthetic process               | 165                      | 905                           | 0.00E+00         |
| GO:0019219 | biological_process | regulation of nucleobase-containing compound metabolic process | 163                      | 904                           | 0.00E+00         |
| GO:0019222 | biological_process | regulation of metabolic process                                | 166                      | 958                           | 0.00E+00         |
| GO:0031323 | biological_process | regulation of cellular metabolic process                       | 165                      | 926                           | 0.00E+00         |
| GO:0031326 | biological_process | regulation of cellular biosynthetic process                    | 165                      | 905                           | 0.00E+00         |
| GO:0050789 | biological_process | regulation of biological process                               | 229                      | 1435                          | 0.00E+00         |
| GO:0050794 | biological_process | regulation of cellular process                                 | 228                      | 1396                          | 0.00E+00         |
| GO:0050896 | biological_process | response to stimulus                                           | 140                      | 731                           | 0.00E+00         |
| GO:0051171 | biological_process | regulation of nitrogen compound metabolic process              | 163                      | 904                           | 0.00E+00         |
| GO:0051252 | biological_process | regulation of RNA metabolic process                            | 163                      | 895                           | 0.00E+00         |
| GO:0051716 | biological_process | cellular response to stimulus                                  | 101                      | 462                           | 0.00E+00         |
| GO:0060255 | biological_process | regulation of macromolecule metabolic process                  | 166                      | 946                           | 0.00E+00         |
| GO:0065007 | biological_process | biological regulation                                          | 232                      | 1474                          | 0.00E+00         |
| GO:0080090 | biological_process | regulation of primary metabolic process                        | 165                      | 926                           | 0.00E+00         |
| GO:2000112 | biological_process | regulation of cellular macromolecule biosynthetic process      | 165                      | 905                           | 0.00E+00         |
| GO:2001141 | biological_process | regulation of RNA biosynthetic process                         | 163                      | 889                           | 0.00E+00         |
| GO:0006979 | biological_process | response to oxidative stress                                   | 34                       | 151                           | 6.26E-08         |
| GO:0006950 | biological_process | response to stress                                             | 54                       | 370                           | 1.34E-05         |
| GO:0006313 | biological_process | transposition, DNA-mediated                                    | 7                        | 13                            | 1.01E-03         |
| GO:0032196 | biological_process | transposition                                                  | 7                        | 13                            | 1.01E-03         |
| GO:0006432 | biological_process | phenylalanyl-tRNA aminoacylation                               | 6                        | 10                            | 2.06E-03         |
| GO:0007155 | biological_process | cell adhesion                                                  | 5                        | 7                             | 3.40E-03         |
| GO:0022610 | biological_process | biological adhesion                                            | 5                        | 7                             | 3.40E-03         |
| GO:0006528 | biological_process | asparagine metabolic process                                   | 6                        | 11                            | 4.26E-03         |
| GO:0006529 | biological_process | asparagine biosynthetic process                                | 6                        | 11                            | 4.26E-03         |
| GO:0006259 | biological_process | DNA metabolic process                                          | 42                       | 330                           | 9.67E-03         |
| GO:0006310 | biological_process | DNA recombination                                              | 12                       | 55                            | 3.48E-02         |
| GO:0005576 | cellular_component | extracellular region                                           | 20                       | 84                            | 8.73E-05         |
| GO:0009279 | cellular_component | cell outer membrane                                            | 6                        | 11                            | 4.26E-03         |

|            |                    |                                                                         |      |       |          |
|------------|--------------------|-------------------------------------------------------------------------|------|-------|----------|
| GO:0005615 | cellular_component | extracellular space                                                     | 5    | 9     | 1.82E-02 |
| GO:0044421 | cellular_component | extracellular region part                                               | 5    | 9     | 1.82E-02 |
| GO:0044462 | cellular_component | external encapsulating structure part                                   | 6    | 14    | 2.32E-02 |
| GO:0000155 | molecular_function | phosphorelay sensor kinase activity                                     | 59   | 95    | 0.00E+00 |
| GO:0001071 | molecular_function | nucleic acid binding transcription factor activity                      | 100  | 497   | 0.00E+00 |
| GO:0003676 | molecular_function | nucleic acid binding                                                    | 323  | 2890  | 0.00E+00 |
| GO:0003677 | molecular_function | DNA binding                                                             | 252  | 1545  | 0.00E+00 |
| GO:0003700 | molecular_function | transcription factor activity, sequence-specific DNA binding            | 100  | 497   | 0.00E+00 |
| GO:0004673 | molecular_function | protein histidine kinase activity                                       | 59   | 95    | 0.00E+00 |
| GO:0004871 | molecular_function | signal transducer activity                                              | 69   | 142   | 0.00E+00 |
| GO:0004872 | molecular_function | receptor activity                                                       | 69   | 126   | 0.00E+00 |
| GO:0016775 | molecular_function | phosphotransferase activity, nitrogenous group as acceptor              | 59   | 95    | 0.00E+00 |
| GO:0038023 | molecular_function | signaling receptor activity                                             | 69   | 126   | 0.00E+00 |
| GO:0043565 | molecular_function | sequence-specific DNA binding                                           | 63   | 275   | 0.00E+00 |
| GO:0060089 | molecular_function | molecular transducer activity                                           | 69   | 142   | 0.00E+00 |
| GO:0046983 | molecular_function | protein dimerization activity                                           | 62   | 361   | 1.90E-09 |
| GO:0005488 | molecular_function | binding                                                                 | 783  | 9945  | 1.83E-08 |
| GO:0004601 | molecular_function | peroxidase activity                                                     | 35   | 159   | 6.72E-08 |
| GO:0016684 | molecular_function | oxidoreductase activity, acting on peroxide as acceptor                 | 35   | 159   | 6.72E-08 |
| GO:0046906 | molecular_function | tetrapyrrole binding                                                    | 57   | 356   | 1.98E-07 |
| GO:0020037 | molecular_function | heme binding                                                            | 54   | 344   | 1.08E-06 |
| GO:0016209 | molecular_function | antioxidant activity                                                    | 35   | 188   | 6.62E-06 |
| GO:0097159 | molecular_function | organic cyclic compound binding                                         | 475  | 5729  | 1.53E-05 |
| GO:1901363 | molecular_function | heterocyclic compound binding                                           | 475  | 5729  | 1.53E-05 |
| GO:0004888 | molecular_function | transmembrane signaling receptor activity                               | 10   | 25    | 3.41E-04 |
| GO:0004803 | molecular_function | transposase activity                                                    | 7    | 13    | 1.01E-03 |
| GO:0008237 | molecular_function | metallopeptidase activity                                               | 23   | 126   | 1.71E-03 |
| GO:0004826 | molecular_function | phenylalanine-tRNA ligase activity                                      | 6    | 10    | 2.06E-03 |
| GO:0008484 | molecular_function | sulfuric ester hydrolase activity                                       | 5    | 7     | 3.40E-03 |
| GO:0004066 | molecular_function | asparagine synthase (glutamine-hydrolyzing) activity                    | 6    | 11    | 4.26E-03 |
| GO:0003674 | molecular_function | molecular_function                                                      | 1063 | 14928 | 4.90E-03 |
| GO:0004970 | molecular_function | ionotropic glutamate receptor activity                                  | 7    | 16    | 5.62E-03 |
| GO:0005230 | molecular_function | extracellular ligand-gated ion channel activity                         | 7    | 16    | 5.62E-03 |
| GO:0008066 | molecular_function | glutamate receptor activity                                             | 7    | 16    | 5.62E-03 |
| GO:0016884 | molecular_function | carbon-nitrogen ligase activity, with glutamine as amido-N-donor        | 9    | 28    | 8.30E-03 |
| GO:0015276 | molecular_function | ligand-gated ion channel activity                                       | 7    | 17    | 8.98E-03 |
| GO:0022834 | molecular_function | ligand-gated channel activity                                           | 7    | 17    | 8.98E-03 |
| GO:0030246 | molecular_function | carbohydrate binding                                                    | 21   | 133   | 3.41E-02 |
| GO:0000049 | molecular_function | tRNA binding                                                            | 7    | 21    | 4.21E-02 |
| GO:0000990 | molecular_function | transcription factor activity, core RNA polymerase binding              | 7    | 21    | 4.21E-02 |
| GO:0000996 | molecular_function | core DNA-dependent RNA polymerase binding promoter specificity activity | 7    | 21    | 4.21E-02 |

375

376

**Supplementary Table 17. Gene ontology enrichment of the 1,016 unique gene**

377

**families (containing 2,681) in rigid Hornwort based on the hypergeometric test.**

| GO         | Type               | Go Terms                                                       | Number of enriched genes | Number of genes in background | Adjusted P-value |
|------------|--------------------|----------------------------------------------------------------|--------------------------|-------------------------------|------------------|
| GO:0006355 | biological_process | regulation of transcription, DNA-templated                     | 140                      | 1305                          | 0.00E+00         |
| GO:0009889 | biological_process | regulation of biosynthetic process                             | 140                      | 1328                          | 0.00E+00         |
| GO:0010468 | biological_process | regulation of gene expression                                  | 140                      | 1344                          | 0.00E+00         |
| GO:0010556 | biological_process | regulation of macromolecule biosynthetic process               | 140                      | 1328                          | 0.00E+00         |
| GO:0019219 | biological_process | regulation of nucleobase-containing compound metabolic process | 140                      | 1320                          | 0.00E+00         |
| GO:0031323 | biological_process | regulation of cellular metabolic process                       | 140                      | 1353                          | 0.00E+00         |
| GO:0031326 | biological_process | regulation of cellular biosynthetic process                    | 140                      | 1328                          | 0.00E+00         |
| GO:0050789 | biological_process | regulation of biological process                               | 200                      | 2005                          | 0.00E+00         |
| GO:0050794 | biological_process | regulation of cellular process                                 | 189                      | 1948                          | 0.00E+00         |
| GO:0051171 | biological_process | regulation of nitrogen compound metabolic process              | 140                      | 1320                          | 0.00E+00         |
| GO:0051252 | biological_process | regulation of RNA metabolic process                            | 140                      | 1307                          | 0.00E+00         |
| GO:0060255 | biological_process | regulation of macromolecule metabolic process                  | 140                      | 1370                          | 0.00E+00         |
| GO:0065007 | biological_process | biological regulation                                          | 206                      | 2064                          | 0.00E+00         |
| GO:0080090 | biological_process | regulation of primary metabolic process                        | 140                      | 1353                          | 0.00E+00         |
| GO:2000112 | biological_process | regulation of cellular macromolecule biosynthetic process      | 140                      | 1328                          | 0.00E+00         |
| GO:2001141 | biological_process | regulation of RNA biosynthetic process                         | 140                      | 1305                          | 0.00E+00         |
| GO:0019222 | biological_process | regulation of metabolic process                                | 140                      | 1390                          | 2.55E-14         |
| GO:0040008 | biological_process | regulation of growth                                           | 10                       | 10                            | 9.37E-12         |
| GO:0045926 | biological_process | negative regulation of growth                                  | 10                       | 10                            | 9.37E-12         |
| GO:0050896 | biological_process | response to stimulus                                           | 83                       | 909                           | 4.99E-06         |
| GO:0071554 | biological_process | cell wall organization or biogenesis                           | 29                       | 201                           | 2.38E-05         |
| GO:0042545 | biological_process | cell wall modification                                         | 16                       | 77                            | 1.00E-04         |
| GO:0006597 | biological_process | spermine biosynthetic process                                  | 7                        | 13                            | 1.06E-04         |
| GO:0008215 | biological_process | spermine metabolic process                                     | 7                        | 13                            | 1.06E-04         |
| GO:0010411 | biological_process | xyloglucan metabolic process                                   | 13                       | 60                            | 6.47E-04         |
| GO:0006952 | biological_process | defense response                                               | 12                       | 52                            | 7.39E-04         |
| GO:0042546 | biological_process | cell wall biogenesis                                           | 13                       | 65                            | 1.64E-03         |
| GO:0010383 | biological_process | cell wall polysaccharide metabolic process                     | 13                       | 66                            | 1.95E-03         |
| GO:0010410 | biological_process | hemicellulose metabolic process                                | 13                       | 66                            | 1.95E-03         |
| GO:0008216 | biological_process | spermidine metabolic process                                   | 7                        | 20                            | 3.51E-03         |
| GO:0008295 | biological_process | spermidine biosynthetic process                                | 7                        | 20                            | 3.51E-03         |
| GO:0044085 | biological_process | cellular component biogenesis                                  | 17                       | 113                           | 4.40E-03         |
| GO:0006979 | biological_process | response to oxidative stress                                   | 22                       | 174                           | 5.57E-03         |
| GO:0007165 | biological_process | signal transduction                                            | 36                       | 371                           | 1.03E-02         |
| GO:0009309 | biological_process | amine biosynthetic process                                     | 9                        | 41                            | 1.61E-02         |

|            |                    |                                                              |     |       |          |
|------------|--------------------|--------------------------------------------------------------|-----|-------|----------|
| GO:0042401 | biological_process | cellular biogenic amine biosynthetic process                 | 9   | 41    | 1.61E-02 |
| GO:0048519 | biological_process | negative regulation of biological process                    | 10  | 52    | 2.23E-02 |
| GO:0006596 | biological_process | polyamine biosynthetic process                               | 7   | 26    | 2.30E-02 |
| GO:0044036 | biological_process | cell wall macromolecule metabolic process                    | 13  | 85    | 2.96E-02 |
| GO:0006334 | biological_process | nucleosome assembly                                          | 9   | 45    | 3.41E-02 |
| GO:0034728 | biological_process | nucleosome organization                                      | 9   | 46    | 4.05E-02 |
| GO:0006595 | biological_process | polyamine metabolic process                                  | 7   | 29    | 4.79E-02 |
| GO:0005618 | cellular_component | cell wall                                                    | 14  | 68    | 5.39E-04 |
| GO:0030312 | cellular_component | external encapsulating structure                             | 14  | 68    | 5.39E-04 |
| GO:0005667 | cellular_component | transcription factor complex                                 | 10  | 42    | 3.25E-03 |
| GO:0000786 | cellular_component | nucleosome                                                   | 15  | 98    | 1.01E-02 |
| GO:0032993 | cellular_component | protein-DNA complex                                          | 15  | 98    | 1.01E-02 |
| GO:0048046 | cellular_component | apoplast                                                     | 14  | 92    | 1.83E-02 |
| GO:0001071 | molecular_function | nucleic acid binding transcription factor activity           | 99  | 706   | 0.00E+00 |
| GO:0003677 | molecular_function | DNA binding                                                  | 220 | 2147  | 0.00E+00 |
| GO:0003700 | molecular_function | transcription factor activity, sequence-specific DNA binding | 99  | 706   | 0.00E+00 |
| GO:0043531 | molecular_function | ADP binding                                                  | 40  | 131   | 0.00E+00 |
| GO:0004857 | molecular_function | enzyme inhibitor activity                                    | 36  | 160   | 1.33E-12 |
| GO:0003676 | molecular_function | nucleic acid binding                                         | 275 | 3825  | 9.26E-10 |
| GO:0030234 | molecular_function | enzyme regulator activity                                    | 44  | 302   | 1.31E-08 |
| GO:0046983 | molecular_function | protein dimerization activity                                | 63  | 554   | 6.65E-08 |
| GO:0004869 | molecular_function | cysteine-type endopeptidase inhibitor activity               | 10  | 21    | 2.01E-06 |
| GO:0043565 | molecular_function | sequence-specific DNA binding                                | 43  | 377   | 3.36E-05 |
| GO:0005516 | molecular_function | calmodulin binding                                           | 10  | 29    | 7.95E-05 |
| GO:0030599 | molecular_function | pectinesterase activity                                      | 16  | 77    | 1.00E-04 |
| GO:0004014 | molecular_function | adenosylmethionine decarboxylase activity                    | 7   | 13    | 1.06E-04 |
| GO:0004506 | molecular_function | squalene monooxygenase activity                              | 7   | 14    | 2.02E-04 |
| GO:0016762 | molecular_function | xyloglucan:xyloglucosyl transferase activity                 | 14  | 68    | 5.39E-04 |
| GO:0004601 | molecular_function | peroxidase activity                                          | 24  | 183   | 1.39E-03 |
| GO:0016684 | molecular_function | oxidoreductase activity, acting on peroxide as acceptor      | 24  | 183   | 1.39E-03 |
| GO:0004866 | molecular_function | endopeptidase inhibitor activity                             | 10  | 39    | 1.61E-03 |
| GO:0030414 | molecular_function | peptidase inhibitor activity                                 | 10  | 39    | 1.61E-03 |
| GO:0061134 | molecular_function | peptidase regulator activity                                 | 10  | 39    | 1.61E-03 |
| GO:0061135 | molecular_function | endopeptidase regulator activity                             | 10  | 39    | 1.61E-03 |
| GO:0016209 | molecular_function | antioxidant activity                                         | 26  | 213   | 2.23E-03 |
| GO:0008171 | molecular_function | O-methyltransferase activity                                 | 10  | 43    | 4.05E-03 |
| GO:0097159 | molecular_function | organic cyclic compound binding                              | 440 | 7723  | 8.29E-03 |
| GO:1901363 | molecular_function | heterocyclic compound binding                                | 440 | 7723  | 8.29E-03 |
| GO:0005488 | molecular_function | binding                                                      | 727 | 13601 | 1.64E-02 |
| GO:0020037 | molecular_function | heme binding                                                 | 44  | 499   | 1.70E-02 |
| GO:0046906 | molecular_function | tetrapyrrole binding                                         | 44  | 500   | 1.78E-02 |
| GO:0005094 | molecular_function | Rho GDP-dissociation inhibitor activity                      | 5   | 13    | 3.06E-02 |
| GO:0052689 | molecular_function | carboxylic ester hydrolase activity                          | 16  | 125   | 4.99E-02 |



378 **Supplementary Table 18. Gene ontology enrichment of the 6,501 expanded gene**  
379 **families (containing 22,722 genes) in Prickly waterlily based on the**  
380 **hypergeometric test.**

| GO         | Type               | Go Terms                                        | Number of enriched genes | Number of genes in background | Adjusted P-value |
|------------|--------------------|-------------------------------------------------|--------------------------|-------------------------------|------------------|
| GO:0006464 | biological_process | cellular protein modification process           | 616                      | 1316                          | 1.14E-13         |
| GO:0036211 | biological_process | protein modification process                    | 616                      | 1316                          | 1.14E-13         |
| GO:0044267 | biological_process | cellular protein metabolic process              | 834                      | 1860                          | 3.13E-13         |
| GO:0006468 | biological_process | protein phosphorylation                         | 438                      | 918                           | 8.59E-11         |
| GO:0043412 | biological_process | macromolecule modification                      | 628                      | 1426                          | 8.22E-08         |
| GO:0016310 | biological_process | phosphorylation                                 | 450                      | 990                           | 2.56E-07         |
| GO:0006793 | biological_process | phosphorus metabolic process                    | 482                      | 1072                          | 4.05E-07         |
| GO:0006796 | biological_process | phosphate-containing compound metabolic process | 482                      | 1072                          | 4.05E-07         |
| GO:0019538 | biological_process | protein metabolic process                       | 989                      | 2381                          | 3.19E-06         |
| GO:0009250 | biological_process | glucan biosynthetic process                     | 41                       | 58                            | 2.85E-05         |
| GO:0034637 | biological_process | cellular carbohydrate biosynthetic process      | 62                       | 100                           | 4.17E-05         |
| GO:0030244 | biological_process | cellulose biosynthetic process                  | 23                       | 29                            | 7.34E-04         |
| GO:0009314 | biological_process | response to radiation                           | 12                       | 12                            | 1.37E-03         |
| GO:0009416 | biological_process | response to light stimulus                      | 12                       | 12                            | 1.37E-03         |
| GO:0042545 | biological_process | cell wall modification                          | 44                       | 71                            | 2.59E-03         |
| GO:0033692 | biological_process | cellular polysaccharide biosynthetic process    | 41                       | 65                            | 2.77E-03         |
| GO:0000271 | biological_process | polysaccharide biosynthetic process             | 42                       | 68                            | 4.62E-03         |
| GO:0030243 | biological_process | cellulose metabolic process                     | 23                       | 31                            | 5.22E-03         |
| GO:0044260 | biological_process | cellular macromolecule metabolic process        | 1189                     | 2999                          | 6.48E-03         |
| GO:0006544 | biological_process | glycine metabolic process                       | 16                       | 20                            | 2.19E-02         |
| GO:0009581 | biological_process | detection of external stimulus                  | 9                        | 9                             | 2.86E-02         |
| GO:0009582 | biological_process | detection of abiotic stimulus                   | 9                        | 9                             | 2.86E-02         |
| GO:0009583 | biological_process | detection of light stimulus                     | 9                        | 9                             | 2.86E-02         |
| GO:0009584 | biological_process | detection of visible light                      | 9                        | 9                             | 2.86E-02         |
| GO:0018298 | biological_process | protein-chromophore linkage                     | 9                        | 9                             | 2.86E-02         |
| GO:0051606 | biological_process | detection of stimulus                           | 9                        | 9                             | 2.86E-02         |
| GO:0044262 | biological_process | cellular carbohydrate metabolic process         | 81                       | 159                           | 2.97E-02         |
| GO:0006414 | biological_process | translational elongation                        | 26                       | 39                            | 2.99E-02         |
| GO:0005984 | biological_process | disaccharide metabolic process                  | 31                       | 49                            | 3.00E-02         |
| GO:0016051 | biological_process | carbohydrate biosynthetic process               | 68                       | 130                           | 3.71E-02         |
| GO:0006888 | biological_process | ER to Golgi vesicle-mediated transport          | 15                       | 19                            | 4.86E-02         |
| GO:0000159 | cellular_component | protein phosphatase type 2A complex             | 21                       | 23                            | 1.64E-05         |
| GO:0030117 | cellular_component | membrane coat                                   | 39                       | 54                            | 2.29E-05         |
| GO:0008287 | cellular_component | protein serine/threonine phosphatase complex    | 21                       | 24                            | 8.56E-05         |
| GO:0043227 | cellular_component | membrane-bounded organelle                      | 267                      | 594                           | 2.03E-03         |

|            |                    |                                                                 |      |      |          |
|------------|--------------------|-----------------------------------------------------------------|------|------|----------|
| GO:0043231 | cellular_component | intracellular membrane-bounded organelle                        | 267  | 594  | 2.03E-03 |
| GO:0043226 | cellular_component | organelle                                                       | 434  | 1024 | 6.76E-03 |
| GO:0043229 | cellular_component | intracellular organelle                                         | 434  | 1024 | 6.76E-03 |
| GO:0044433 | cellular_component | cytoplasmic vesicle part                                        | 26   | 37   | 7.37E-03 |
| GO:0044464 | cellular_component | cell part                                                       | 902  | 2253 | 1.69E-02 |
| GO:0044424 | cellular_component | intracellular part                                              | 836  | 2082 | 2.10E-02 |
| GO:0030120 | cellular_component | vesicle coat                                                    | 22   | 31   | 2.43E-02 |
| GO:0030234 | molecular_function | enzyme regulator activity                                       | 144  | 246  | 2.53E-10 |
| GO:0035251 | molecular_function | UDP-glucosyltransferase activity                                | 47   | 67   | 4.97E-06 |
| GO:0016301 | molecular_function | kinase activity                                                 | 550  | 1261 | 6.18E-06 |
| GO:0004672 | molecular_function | protein kinase activity                                         | 454  | 1021 | 6.96E-06 |
| GO:0046527 | molecular_function | glucosyltransferase activity                                    | 47   | 68   | 1.04E-05 |
| GO:0005488 | molecular_function | binding                                                         | 3779 | 9945 | 1.93E-05 |
| GO:0016773 | molecular_function | phosphotransferase activity, alcohol group as acceptor          | 513  | 1184 | 5.28E-05 |
| GO:0004857 | molecular_function | enzyme inhibitor activity                                       | 71   | 123  | 2.86E-04 |
| GO:0016759 | molecular_function | cellulose synthase activity                                     | 23   | 29   | 7.34E-04 |
| GO:0016760 | molecular_function | cellulose synthase (UDP-forming) activity                       | 23   | 29   | 7.34E-04 |
| GO:0019208 | molecular_function | phosphatase regulator activity                                  | 23   | 29   | 7.34E-04 |
| GO:0030599 | molecular_function | pectinesterase activity                                         | 44   | 71   | 2.59E-03 |
| GO:0019888 | molecular_function | protein phosphatase regulator activity                          | 21   | 27   | 3.52E-03 |
| GO:0052689 | molecular_function | carboxylic ester hydrolase activity                             | 65   | 117  | 4.52E-03 |
| GO:0008289 | molecular_function | lipid binding                                                   | 50   | 85   | 5.28E-03 |
| GO:0005509 | molecular_function | calcium ion binding                                             | 123  | 252  | 8.27E-03 |
| GO:0004702 | molecular_function | receptor signaling protein serine/threonine kinase activity     | 14   | 16   | 9.51E-03 |
| GO:0004707 | molecular_function | MAP kinase activity                                             | 14   | 16   | 9.51E-03 |
| GO:0005057 | molecular_function | receptor signaling protein activity                             | 14   | 16   | 9.51E-03 |
| GO:0097159 | molecular_function | organic cyclic compound binding                                 | 2202 | 5729 | 1.01E-02 |
| GO:1901363 | molecular_function | heterocyclic compound binding                                   | 2202 | 5729 | 1.01E-02 |
| GO:0003723 | molecular_function | RNA binding                                                     | 248  | 559  | 1.26E-02 |
| GO:0003676 | molecular_function | nucleic acid binding                                            | 1144 | 2890 | 1.30E-02 |
| GO:0008194 | molecular_function | UDP-glycosyltransferase activity                                | 62   | 114  | 1.65E-02 |
| GO:0005516 | molecular_function | calmodulin binding                                              | 16   | 20   | 2.19E-02 |
| GO:0016307 | molecular_function | phosphatidylinositol phosphate kinase activity                  | 16   | 20   | 2.19E-02 |
| GO:0004743 | molecular_function | pyruvate kinase activity                                        | 18   | 24   | 3.43E-02 |
| GO:0030955 | molecular_function | potassium ion binding                                           | 18   | 24   | 3.43E-02 |
| GO:0031420 | molecular_function | alkali metal ion binding                                        | 18   | 24   | 3.43E-02 |
| GO:0016772 | molecular_function | transferase activity, transferring phosphorus-containing groups | 605  | 1483 | 3.48E-02 |

381

382

383

**Supplementary Table 19. Gene ontology enrichment of the 3,473 expanded gene**

384

**families (9,535) in rigid Hornwort based on the hypergeometric test.**

| GO         | Type               | Go Terms                                                       | Number of enriched genes | Number of genes in background | Adjusted P-value |
|------------|--------------------|----------------------------------------------------------------|--------------------------|-------------------------------|------------------|
| GO:0031323 | biological_process | regulation of cellular metabolic process                       | 1052                     | 1353                          | 7.48E-13         |
| GO:0080090 | biological_process | regulation of primary metabolic process                        | 1050                     | 1353                          | 2.04E-12         |
| GO:0019222 | biological_process | regulation of metabolic process                                | 1076                     | 1390                          | 3.29E-12         |
| GO:0044267 | biological_process | cellular protein metabolic process                             | 2036                     | 2727                          | 3.39E-12         |
| GO:0051252 | biological_process | regulation of RNA metabolic process                            | 1015                     | 1307                          | 4.39E-12         |
| GO:0009889 | biological_process | regulation of biosynthetic process                             | 1030                     | 1328                          | 5.08E-12         |
| GO:0010556 | biological_process | regulation of macromolecule biosynthetic process               | 1030                     | 1328                          | 5.08E-12         |
| GO:0031326 | biological_process | regulation of cellular biosynthetic process                    | 1030                     | 1328                          | 5.08E-12         |
| GO:2000112 | biological_process | regulation of cellular macromolecule biosynthetic process      | 1030                     | 1328                          | 5.08E-12         |
| GO:0006355 | biological_process | regulation of transcription, DNA-templated                     | 1013                     | 1305                          | 5.73E-12         |
| GO:2001141 | biological_process | regulation of RNA biosynthetic process                         | 1013                     | 1305                          | 5.73E-12         |
| GO:0019219 | biological_process | regulation of nucleobase-containing compound metabolic process | 1023                     | 1320                          | 9.12E-12         |
| GO:0051171 | biological_process | regulation of nitrogen compound metabolic process              | 1023                     | 1320                          | 9.12E-12         |
| GO:0006793 | biological_process | phosphorus metabolic process                                   | 1298                     | 1703                          | 2.66E-11         |
| GO:0006796 | biological_process | phosphate-containing compound metabolic process                | 1298                     | 1703                          | 2.66E-11         |
| GO:0060255 | biological_process | regulation of macromolecule metabolic process                  | 1057                     | 1370                          | 2.88E-11         |
| GO:0010468 | biological_process | regulation of gene expression                                  | 1038                     | 1344                          | 3.05E-11         |
| GO:0019538 | biological_process | protein metabolic process                                      | 2459                     | 3338                          | 8.88E-11         |
| GO:0016310 | biological_process | phosphorylation                                                | 1221                     | 1604                          | 3.00E-10         |
| GO:0006468 | biological_process | protein phosphorylation                                        | 1176                     | 1550                          | 3.86E-09         |
| GO:0006464 | biological_process | cellular protein modification process                          | 1537                     | 2065                          | 5.54E-08         |
| GO:0036211 | biological_process | protein modification process                                   | 1537                     | 2065                          | 5.54E-08         |
| GO:0051649 | biological_process | establishment of localization in cell                          | 324                      | 399                           | 1.78E-06         |
| GO:0006886 | biological_process | intracellular protein transport                                | 210                      | 249                           | 2.38E-06         |
| GO:0015031 | biological_process | protein transport                                              | 261                      | 317                           | 4.66E-06         |
| GO:0045184 | biological_process | establishment of protein localization                          | 261                      | 317                           | 4.66E-06         |
| GO:0046907 | biological_process | intracellular transport                                        | 284                      | 353                           | 8.62E-05         |
| GO:0015672 | biological_process | monovalent inorganic cation transport                          | 131                      | 152                           | 1.36E-04         |
| GO:0043412 | biological_process | macromolecule modification                                     | 1568                     | 2157                          | 9.47E-04         |
| GO:0016192 | biological_process | vesicle-mediated transport                                     | 223                      | 277                           | 1.58E-03         |
| GO:0009056 | biological_process | catabolic process                                              | 409                      | 533                           | 4.25E-03         |
| GO:0006739 | biological_process | NADP metabolic process                                         | 28                       | 28                            | 1.05E-02         |
| GO:0009698 | biological_process | phenylpropanoid metabolic process                              | 24                       | 24                            | 4.82E-02         |
| GO:0009808 | biological_process | lignin metabolic process                                       | 24                       | 24                            | 4.82E-02         |
| GO:0046271 | biological_process | phenylpropanoid catabolic process                              | 24                       | 24                            | 4.82E-02         |
| GO:0046274 | biological_process | lignin catabolic process                                       | 24                       | 24                            | 4.82E-02         |

|            |                    |                                                                 |      |       |          |
|------------|--------------------|-----------------------------------------------------------------|------|-------|----------|
| GO:0005575 | cellular_component | cellular_component                                              | 3636 | 4983  | 1.99E-13 |
| GO:0044464 | cellular_component | cell part                                                       | 2124 | 2907  | 7.03E-07 |
| GO:0044444 | cellular_component | cytoplasmic part                                                | 840  | 1103  | 1.28E-06 |
| GO:0044424 | cellular_component | intracellular part                                              | 1960 | 2684  | 4.54E-06 |
| GO:0030117 | cellular_component | membrane coat                                                   | 65   | 68    | 1.37E-05 |
| GO:0044433 | cellular_component | cytoplasmic vesicle part                                        | 45   | 46    | 2.45E-04 |
| GO:0043234 | cellular_component | protein complex                                                 | 658  | 873   | 8.91E-04 |
| GO:0030120 | cellular_component | vesicle coat                                                    | 39   | 40    | 2.11E-03 |
| GO:0016020 | cellular_component | membrane                                                        | 940  | 1274  | 3.29E-03 |
| GO:0043226 | cellular_component | organelle                                                       | 1022 | 1392  | 5.14E-03 |
| GO:0043229 | cellular_component | intracellular organelle                                         | 1022 | 1392  | 5.14E-03 |
| GO:0043227 | cellular_component | membrane-bounded organelle                                      | 653  | 877   | 1.40E-02 |
| GO:0043231 | cellular_component | intracellular membrane-bounded organelle                        | 653  | 877   | 1.40E-02 |
| GO:0003676 | molecular_function | nucleic acid binding                                            | 2828 | 3825  | 0.00E+00 |
| GO:0097159 | molecular_function | organic cyclic compound binding                                 | 5583 | 7723  | 0.00E+00 |
| GO:1901363 | molecular_function | heterocyclic compound binding                                   | 5583 | 7723  | 0.00E+00 |
| GO:0035639 | molecular_function | purine ribonucleoside triphosphate binding                      | 2338 | 3172  | 2.85E-10 |
| GO:0005524 | molecular_function | ATP binding                                                     | 2059 | 2778  | 3.08E-10 |
| GO:0004672 | molecular_function | protein kinase activity                                         | 1209 | 1588  | 3.67E-10 |
| GO:0016301 | molecular_function | kinase activity                                                 | 1395 | 1848  | 5.14E-10 |
| GO:0016773 | molecular_function | phosphotransferase activity, alcohol group as acceptor          | 1339 | 1774  | 1.63E-09 |
| GO:0003677 | molecular_function | DNA binding                                                     | 1589 | 2147  | 4.16E-07 |
| GO:0016772 | molecular_function | transferase activity, transferring phosphorus-containing groups | 1527 | 2077  | 1.68E-05 |
| GO:0005488 | molecular_function | binding                                                         | 9452 | 13601 | 7.14E-04 |
| GO:0019843 | molecular_function | rRNA binding                                                    | 34   | 34    | 1.06E-03 |
| GO:0003723 | molecular_function | RNA binding                                                     | 478  | 625   | 1.51E-03 |
| GO:0001071 | molecular_function | nucleic acid binding transcription factor activity              | 535  | 706   | 2.77E-03 |
| GO:0003700 | molecular_function | transcription factor activity, sequence-specific DNA binding    | 535  | 706   | 2.77E-03 |
| GO:0036094 | molecular_function | small molecule binding                                          | 2676 | 3753  | 4.04E-03 |
| GO:0005200 | molecular_function | structural constituent of cytoskeleton                          | 30   | 30    | 4.89E-03 |
| GO:0016740 | molecular_function | transferase activity                                            | 2546 | 3568  | 5.11E-03 |
| GO:0000166 | molecular_function | nucleotide binding                                              | 2553 | 3582  | 8.25E-03 |
| GO:1901265 | molecular_function | nucleoside phosphate binding                                    | 2553 | 3582  | 8.25E-03 |
| GO:0017076 | molecular_function | purine nucleotide binding                                       | 2374 | 3325  | 8.55E-03 |
| GO:0032553 | molecular_function | ribonucleotide binding                                          | 2358 | 3307  | 1.57E-02 |
| GO:0032555 | molecular_function | purine ribonucleotide binding                                   | 2358 | 3307  | 1.57E-02 |
| GO:0030554 | molecular_function | adenyl nucleotide binding                                       | 2085 | 2920  | 2.95E-02 |
| GO:0032559 | molecular_function | adenyl ribonucleotide binding                                   | 2079 | 2913  | 3.60E-02 |
| GO:0004190 | molecular_function | aspartic-type endopeptidase activity                            | 76   | 88    | 3.67E-02 |
| GO:0070001 | molecular_function | aspartic-type peptidase activity                                | 76   | 88    | 3.67E-02 |
| GO:0043565 | molecular_function | sequence-specific DNA binding                                   | 291  | 377   | 3.70E-02 |
| GO:0052716 | molecular_function | hydroquinone:oxygen oxidoreductase activity                     | 24   | 24    | 4.82E-02 |

385  
386

**Supplementary Table 20. Gene ontology enrichment of the 5,927 contracted gene families (472) in prickly waterlily based on the hypergeometric test.**

| GO         | Type               | Go Terms                                           | Number of enriched genes | Number of genes in background | Adjusted P-value |
|------------|--------------------|----------------------------------------------------|--------------------------|-------------------------------|------------------|
| GO:0008037 | biological_process | cell recognition                                   | 19                       | 32                            | 0.00E+00         |
| GO:0048544 | biological_process | recognition of pollen                              | 19                       | 32                            | 0.00E+00         |
| GO:0048610 | biological_process | obsolete cellular process involved in reproduction | 19                       | 37                            | 0.00E+00         |
| GO:0022414 | biological_process | reproductive process                               | 19                       | 42                            | 0.00E+00         |
| GO:0044702 | biological_process | single organism reproductive process               | 19                       | 42                            | 0.00E+00         |
| GO:0044699 | biological_process | single-organism process                            | 19                       | 80                            | 7.11E-15         |
| GO:0070588 | biological_process | calcium ion transmembrane transport                | 7                        | 7                             | 1.78E-11         |
| GO:0055085 | biological_process | transmembrane transport                            | 51                       | 940                           | 5.31E-11         |
| GO:0006816 | biological_process | calcium ion transport                              | 7                        | 16                            | 1.78E-07         |
| GO:0010215 | biological_process | cellulose microfibril organization                 | 5                        | 7                             | 1.17E-06         |
| GO:0016049 | biological_process | cell growth                                        | 5                        | 7                             | 1.17E-06         |
| GO:0030198 | biological_process | extracellular matrix organization                  | 5                        | 7                             | 1.17E-06         |
| GO:0040007 | biological_process | growth                                             | 5                        | 7                             | 1.17E-06         |
| GO:0043062 | biological_process | extracellular structure organization               | 5                        | 7                             | 1.17E-06         |
| GO:0008150 | biological_process | biological_process                                 | 260                      | 12288                         | 6.26E-04         |
| GO:0070838 | biological_process | divalent metal ion transport                       | 7                        | 48                            | 6.98E-04         |
| GO:0072511 | biological_process | divalent inorganic cation transport                | 7                        | 48                            | 6.98E-04         |
| GO:0006810 | biological_process | transport                                          | 55                       | 1738                          | 8.09E-04         |
| GO:0051234 | biological_process | establishment of localization                      | 55                       | 1738                          | 8.09E-04         |
| GO:0055114 | biological_process | oxidation-reduction process                        | 49                       | 1554                          | 2.56E-03         |
| GO:0005975 | biological_process | carbohydrate metabolic process                     | 37                       | 1069                          | 3.31E-03         |
| GO:0016020 | cellular_component | membrane                                           | 54                       | 1274                          | 1.70E-08         |
| GO:0031224 | cellular_component | intrinsic component of membrane                    | 44                       | 1058                          | 9.48E-07         |
| GO:0031225 | cellular_component | anchored component of membrane                     | 5                        | 12                            | 6.39E-06         |
| GO:0016021 | cellular_component | integral component of membrane                     | 39                       | 1046                          | 6.52E-05         |
| GO:0044425 | cellular_component | membrane part                                      | 44                       | 1365                          | 5.81E-04         |
| GO:0004888 | molecular_function | transmembrane signaling receptor activity          | 17                       | 22                            | 0.00E+00         |
| GO:0004970 | molecular_function | ionotropic glutamate receptor activity             | 16                       | 18                            | 0.00E+00         |
| GO:0005230 | molecular_function | extracellular ligand-gated ion channel activity    | 16                       | 18                            | 0.00E+00         |
| GO:0008066 | molecular_function | glutamate receptor activity                        | 16                       | 18                            | 0.00E+00         |
| GO:0015276 | molecular_function | ligand-gated ion channel activity                  | 16                       | 18                            | 0.00E+00         |
| GO:0022834 | molecular_function | ligand-gated channel activity                      | 16                       | 18                            | 0.00E+00         |
| GO:0004872 | molecular_function | receptor activity                                  | 17                       | 64                            | 6.75E-14         |
| GO:0038023 | molecular_function | signaling receptor activity                        | 17                       | 64                            | 6.75E-14         |
| GO:0022836 | molecular_function | gated channel activity                             | 16                       | 56                            | 1.35E-13         |
| GO:0004674 | molecular_function | protein serine/threonine kinase activity           | 19                       | 97                            | 6.08E-13         |
| GO:0003824 | molecular_function | catalytic activity                                 | 242                      | 9317                          | 7.26E-13         |
| GO:0004871 | molecular_function | signal transducer activity                         | 17                       | 86                            | 1.38E-11         |

|            |                    |                                                                                       |    |      |          |
|------------|--------------------|---------------------------------------------------------------------------------------|----|------|----------|
| GO:0060089 | molecular_function | molecular transducer activity                                                         | 17 | 86   | 1.38E-11 |
| GO:0005216 | molecular_function | ion channel activity                                                                  | 16 | 79   | 4.79E-11 |
| GO:0022838 | molecular_function | substrate-specific channel activity                                                   | 16 | 79   | 4.79E-11 |
| GO:0005388 | molecular_function | calcium-transporting ATPase activity                                                  | 7  | 8    | 3.34E-10 |
| GO:0004553 | molecular_function | hydrolase activity, hydrolyzing O-glycosyl compounds                                  | 34 | 489  | 1.30E-09 |
| GO:0022857 | molecular_function | transmembrane transporter activity                                                    | 49 | 949  | 2.09E-09 |
| GO:0016798 | molecular_function | hydrolase activity, acting on glycosyl bonds                                          | 34 | 518  | 6.14E-09 |
| GO:0015267 | molecular_function | channel activity                                                                      | 17 | 128  | 1.07E-08 |
| GO:0022803 | molecular_function | passive transmembrane transporter activity                                            | 17 | 128  | 1.07E-08 |
| GO:0005215 | molecular_function | transporter activity                                                                  | 49 | 1015 | 2.13E-08 |
| GO:0015075 | molecular_function | ion transmembrane transporter activity                                                | 30 | 440  | 3.38E-08 |
| GO:0022891 | molecular_function | substrate-specific transmembrane transporter activity                                 | 30 | 463  | 1.13E-07 |
| GO:0015085 | molecular_function | calcium ion transmembrane transporter activity                                        | 7  | 17   | 7.06E-07 |
| GO:0022892 | molecular_function | substrate-specific transporter activity                                               | 30 | 513  | 1.19E-06 |
| GO:0015662 | molecular_function | ATPase activity, coupled to transmembrane movement of ions, phosphorylative mechanism | 7  | 21   | 3.97E-06 |
| GO:0003690 | molecular_function | double-stranded DNA binding                                                           | 9  | 50   | 1.71E-05 |
| GO:0019829 | molecular_function | cation-transporting ATPase activity                                                   | 7  | 29   | 4.71E-05 |
| GO:0043566 | molecular_function | structure-specific DNA binding                                                        | 9  | 68   | 2.53E-04 |
| GO:0016758 | molecular_function | transferase activity, transferring hexosyl groups                                     | 23 | 431  | 2.77E-04 |
| GO:0042625 | molecular_function | ATPase coupled ion transmembrane transporter activity                                 | 7  | 42   | 6.66E-04 |
| GO:0045735 | molecular_function | nutrient reservoir activity                                                           | 5  | 17   | 7.05E-04 |
| GO:0072509 | molecular_function | divalent inorganic cation transmembrane transporter activity                          | 7  | 49   | 1.90E-03 |
| GO:0016491 | molecular_function | oxidoreductase activity                                                               | 53 | 1669 | 2.50E-03 |
| GO:0030246 | molecular_function | carbohydrate binding                                                                  | 12 | 163  | 2.97E-03 |
| GO:0071949 | molecular_function | FAD binding                                                                           | 7  | 56   | 4.62E-03 |
| GO:0015298 | molecular_function | solute:cation antiporter activity                                                     | 6  | 44   | 9.54E-03 |
| GO:0015299 | molecular_function | solute:proton antiporter activity                                                     | 6  | 44   | 9.54E-03 |
| GO:0005516 | molecular_function | calmodulin binding                                                                    | 5  | 29   | 1.13E-02 |
| GO:0022804 | molecular_function | active transmembrane transporter activity                                             | 15 | 283  | 1.47E-02 |
| GO:0022890 | molecular_function | inorganic cation transmembrane transporter activity                                   | 14 | 253  | 1.53E-02 |
| GO:0016740 | molecular_function | transferase activity                                                                  | 89 | 3568 | 4.12E-02 |

387

388

389 **Supplementary Table 21. Gene ontology enrichment of the 5,024 contracted gene**  
 390 **families (containing 1,332 genes) in rigid Hornwort based on the hypergeometric**  
 391 **test.**

| GO         | Type               | Go Terms                                        | Number of enriched genes | Number of genes in background | Adjusted P-value |
|------------|--------------------|-------------------------------------------------|--------------------------|-------------------------------|------------------|
| GO:0055085 | biological_process | transmembrane transport                         | 139                      | 763                           | 0.00E+00         |
| GO:0006810 | biological_process | transport                                       | 178                      | 1366                          | 0.00E+00         |
| GO:0051234 | biological_process | establishment of localization                   | 178                      | 1366                          | 0.00E+00         |
| GO:0015914 | biological_process | phospholipid transport                          | 10                       | 12                            | 4.12E-09         |
| GO:0006813 | biological_process | potassium ion transport                         | 16                       | 38                            | 2.67E-08         |
| GO:0006869 | biological_process | lipid transport                                 | 12                       | 23                            | 1.98E-07         |
| GO:0006855 | biological_process | drug transmembrane transport                    | 14                       | 33                            | 2.96E-07         |
| GO:0015893 | biological_process | drug transport                                  | 14                       | 33                            | 2.96E-07         |
| GO:0006468 | biological_process | protein phosphorylation                         | 104                      | 918                           | 4.64E-07         |
| GO:0071804 | biological_process | cellular potassium ion transport                | 11                       | 24                            | 5.13E-06         |
| GO:0071805 | biological_process | potassium ion transmembrane transport           | 11                       | 24                            | 5.13E-06         |
| GO:0006811 | biological_process | ion transport                                   | 53                       | 383                           | 5.99E-06         |
| GO:0016310 | biological_process | phosphorylation                                 | 106                      | 990                           | 6.36E-06         |
| GO:0006559 | biological_process | L-phenylalanine catabolic process               | 7                        | 9                             | 8.69E-06         |
| GO:0006793 | biological_process | phosphorus metabolic process                    | 111                      | 1072                          | 1.75E-05         |
| GO:0006796 | biological_process | phosphate-containing compound metabolic process | 111                      | 1072                          | 1.75E-05         |
| GO:0006820 | biological_process | anion transport                                 | 15                       | 50                            | 1.94E-05         |
| GO:0008150 | biological_process | biological_process                              | 693                      | 9594                          | 2.65E-05         |
| GO:0071702 | biological_process | organic substance transport                     | 15                       | 52                            | 3.42E-05         |
| GO:0019538 | biological_process | protein metabolic process                       | 205                      | 2381                          | 2.22E-04         |
| GO:0006464 | biological_process | cellular protein modification process           | 124                      | 1316                          | 4.63E-04         |
| GO:0036211 | biological_process | protein modification process                    | 124                      | 1316                          | 4.63E-04         |
| GO:0030001 | biological_process | metal ion transport                             | 28                       | 183                           | 9.80E-04         |
| GO:0008272 | biological_process | sulfate transport                               | 7                        | 15                            | 1.10E-03         |
| GO:0009719 | biological_process | response to endogenous stimulus                 | 14                       | 60                            | 1.22E-03         |
| GO:0009725 | biological_process | response to hormone                             | 14                       | 60                            | 1.22E-03         |
| GO:0010033 | biological_process | response to organic substance                   | 14                       | 60                            | 1.22E-03         |
| GO:0009074 | biological_process | aromatic amino acid family catabolic process    | 7                        | 17                            | 2.97E-03         |
| GO:0015672 | biological_process | monovalent inorganic cation transport           | 21                       | 128                           | 3.90E-03         |
| GO:0043412 | biological_process | macromolecule modification                      | 127                      | 1426                          | 4.97E-03         |
| GO:0015698 | biological_process | inorganic anion transport                       | 11                       | 46                            | 7.40E-03         |
| GO:0008037 | biological_process | cell recognition                                | 6                        | 14                            | 8.12E-03         |
| GO:0048544 | biological_process | recognition of pollen                           | 6                        | 14                            | 8.12E-03         |

|            |                    |                                                       |     |      |          |
|------------|--------------------|-------------------------------------------------------|-----|------|----------|
| GO:0034220 | biological_process | ion transmembrane transport                           | 20  | 127  | 1.03E-02 |
| GO:0006857 | biological_process | oligopeptide transport                                | 6   | 15   | 1.28E-02 |
| GO:0006558 | biological_process | L-phenylalanine metabolic process                     | 7   | 21   | 1.41E-02 |
| GO:0015833 | biological_process | peptide transport                                     | 6   | 16   | 1.94E-02 |
| GO:0048610 | biological_process | obsolete cellular process involved in reproduction    | 6   | 16   | 1.94E-02 |
| GO:0044267 | biological_process | cellular protein metabolic process                    | 155 | 1860 | 2.07E-02 |
| GO:0042221 | biological_process | response to chemical                                  | 15  | 86   | 2.13E-02 |
| GO:0006508 | biological_process | proteolysis                                           | 52  | 507  | 3.43E-02 |
| GO:0016020 | cellular_component | membrane                                              | 146 | 1008 | 0.00E+00 |
| GO:0005575 | cellular_component | cellular_component                                    | 316 | 3901 | 1.13E-05 |
| GO:0031224 | cellular_component | intrinsic component of membrane                       | 89  | 890  | 1.82E-04 |
| GO:0016021 | cellular_component | integral component of membrane                        | 87  | 876  | 2.93E-04 |
| GO:0005743 | cellular_component | mitochondrial inner membrane                          | 5   | 17   | 3.50E-02 |
| GO:0019866 | cellular_component | organelle inner membrane                              | 5   | 17   | 3.50E-02 |
| GO:0005215 | molecular_function | transporter activity                                  | 149 | 813  | 0.00E+00 |
| GO:0022857 | molecular_function | transmembrane transporter activity                    | 134 | 753  | 0.00E+00 |
| GO:0043531 | molecular_function | ADP binding                                           | 20  | 31   | 0.00E+00 |
| GO:0022892 | molecular_function | substrate-specific transporter activity               | 70  | 398  | 9.11E-13 |
| GO:0022804 | molecular_function | active transmembrane transporter activity             | 43  | 212  | 1.27E-09 |
| GO:0004012 | molecular_function | phospholipid-translocating ATPase activity            | 10  | 11   | 1.29E-09 |
| GO:0005548 | molecular_function | phospholipid transporter activity                     | 10  | 11   | 1.29E-09 |
| GO:0015075 | molecular_function | ion transmembrane transporter activity                | 57  | 336  | 1.36E-09 |
| GO:0015291 | molecular_function | secondary active transmembrane transporter activity   | 27  | 95   | 2.84E-09 |
| GO:0015079 | molecular_function | potassium ion transmembrane transporter activity      | 16  | 34   | 5.98E-09 |
| GO:0046873 | molecular_function | metal ion transmembrane transporter activity          | 27  | 98   | 6.27E-09 |
| GO:0005319 | molecular_function | lipid transporter activity                            | 10  | 12   | 7.29E-09 |
| GO:0022891 | molecular_function | substrate-specific transmembrane transporter activity | 58  | 361  | 8.51E-09 |
| GO:0043492 | molecular_function | ATPase activity, coupled to movement of substances    | 27  | 109  | 8.67E-08 |
| GO:0004553 | molecular_function | hydrolase activity, hydrolyzing O-glycosyl compounds  | 56  | 379  | 4.38E-07 |
| GO:0032559 | molecular_function | adenyl ribonucleotide binding                         | 203 | 2153 | 4.93E-07 |
| GO:0015238 | molecular_function | drug transmembrane transporter activity               | 14  | 33   | 5.24E-07 |
| GO:0090484 | molecular_function | drug transporter activity                             | 14  | 33   | 5.24E-07 |
| GO:0030554 | molecular_function | adenyl nucleotide binding                             | 203 | 2160 | 6.43E-07 |
| GO:0016798 | molecular_function | hydrolase activity, acting on glycosyl bonds          | 56  | 400  | 3.06E-06 |
| GO:0005216 | molecular_function | ion channel activity                                  | 16  | 49   | 3.63E-06 |
| GO:0022838 | molecular_function | substrate-specific channel activity                   | 16  | 49   | 3.63E-06 |



|            |                    |                                                                                                       |     |      |          |
|------------|--------------------|-------------------------------------------------------------------------------------------------------|-----|------|----------|
| GO:0004252 | molecular_function | serine-type endopeptidase activity                                                                    | 29  | 147  | 5.39E-06 |
| GO:0016787 | molecular_function | hydrolase activity                                                                                    | 218 | 2425 | 6.33E-06 |
| GO:0010333 | molecular_function | terpene synthase activity                                                                             | 6   | 6    | 7.50E-06 |
| GO:0032553 | molecular_function | ribonucleotide binding                                                                                | 217 | 2443 | 1.78E-05 |
| GO:0032555 | molecular_function | purine ribonucleotide binding                                                                         | 217 | 2443 | 1.78E-05 |
| GO:0000287 | molecular_function | magnesium ion binding                                                                                 | 24  | 113  | 1.80E-05 |
| GO:0017076 | molecular_function | purine nucleotide binding                                                                             | 217 | 2456 | 2.69E-05 |
| GO:0004672 | molecular_function | protein kinase activity                                                                               | 107 | 1021 | 2.87E-05 |
| GO:0016887 | molecular_function | ATPase activity                                                                                       | 46  | 322  | 2.94E-05 |
| GO:0003824 | molecular_function | catalytic activity                                                                                    | 571 | 7665 | 4.09E-05 |
| GO:0016841 | molecular_function | ammonia-lyase activity                                                                                | 8   | 14   | 6.48E-05 |
| GO:0033926 | molecular_function | glycopeptide alpha-N-acetylgalactosaminidase activity                                                 | 7   | 11   | 1.26E-04 |
| GO:0000166 | molecular_function | nucleotide binding                                                                                    | 229 | 2675 | 1.35E-04 |
| GO:1901265 | molecular_function | nucleoside phosphate binding                                                                          | 229 | 2675 | 1.35E-04 |
| GO:0008236 | molecular_function | serine-type peptidase activity                                                                        | 34  | 219  | 1.59E-04 |
| GO:0017171 | molecular_function | serine hydrolase activity                                                                             | 34  | 219  | 1.59E-04 |
| GO:0042623 | molecular_function | ATPase activity, coupled                                                                              | 28  | 163  | 1.76E-04 |
| GO:0008271 | molecular_function | secondary active sulfate transmembrane transporter activity                                           | 6   | 8    | 1.88E-04 |
| GO:0022836 | molecular_function | gated channel activity                                                                                | 12  | 37   | 2.07E-04 |
| GO:0016773 | molecular_function | phosphotransferase activity, alcohol group as acceptor                                                | 116 | 1184 | 2.68E-04 |
| GO:0015267 | molecular_function | channel activity                                                                                      | 18  | 84   | 5.40E-04 |
| GO:0022803 | molecular_function | passive transmembrane transporter activity                                                            | 18  | 84   | 5.40E-04 |
| GO:0016840 | molecular_function | carbon-nitrogen lyase activity                                                                        | 10  | 28   | 5.61E-04 |
| GO:0036094 | molecular_function | small molecule binding                                                                                | 237 | 2849 | 7.27E-04 |
| GO:0008509 | molecular_function | anion transmembrane transporter activity                                                              | 13  | 48   | 7.45E-04 |
| GO:0005524 | molecular_function | ATP binding                                                                                           | 183 | 2118 | 1.21E-03 |
| GO:0015103 | molecular_function | inorganic anion transmembrane transporter activity                                                    | 12  | 44   | 1.55E-03 |
| GO:0005506 | molecular_function | iron ion binding                                                                                      | 32  | 222  | 1.56E-03 |
| GO:0015116 | molecular_function | sulfate transmembrane transporter activity                                                            | 7   | 15   | 1.95E-03 |
| GO:0005249 | molecular_function | voltage-gated potassium channel activity                                                              | 5   | 7    | 2.21E-03 |
| GO:0022843 | molecular_function | voltage-gated cation channel activity                                                                 | 5   | 7    | 2.21E-03 |
| GO:0015297 | molecular_function | antiporter activity                                                                                   | 16  | 76   | 2.27E-03 |
| GO:0016301 | molecular_function | kinase activity                                                                                       | 117 | 1261 | 3.03E-03 |
| GO:0022890 | molecular_function | inorganic cation transmembrane transporter activity                                                   | 30  | 211  | 3.73E-03 |
| GO:0016705 | molecular_function | oxidoreductase activity, acting on paired donors, with incorporation or reduction of molecular oxygen | 28  | 193  | 4.67E-03 |

|            |                    |                                                                                                |     |      |          |
|------------|--------------------|------------------------------------------------------------------------------------------------|-----|------|----------|
| GO:0008324 | molecular_function | cation transmembrane transporter activity                                                      | 35  | 267  | 4.96E-03 |
| GO:0004175 | molecular_function | endopeptidase activity                                                                         | 38  | 314  | 1.36E-02 |
| GO:0035639 | molecular_function | purine ribonucleoside triphosphate binding                                                     | 197 | 2408 | 1.43E-02 |
| GO:0016838 | molecular_function | carbon-oxygen lyase activity, acting on phosphates                                             | 6   | 14   | 1.44E-02 |
| GO:0016820 | molecular_function | hydrolase activity, acting on acid anhydrides, catalyzing transmembrane movement of substances | 17  | 98   | 1.67E-02 |
| GO:0042626 | molecular_function | ATPase activity, coupled to transmembrane movement of substances                               | 17  | 98   | 1.67E-02 |
| GO:0004674 | molecular_function | protein serine/threonine kinase activity                                                       | 12  | 59   | 3.37E-02 |
| GO:0004970 | molecular_function | ionotropic glutamate receptor activity                                                         | 6   | 16   | 3.43E-02 |
| GO:0005230 | molecular_function | extracellular ligand-gated ion channel activity                                                | 6   | 16   | 3.43E-02 |
| GO:0008066 | molecular_function | glutamate receptor activity                                                                    | 6   | 16   | 3.43E-02 |
| GO:0017111 | molecular_function | nucleoside-triphosphatase activity                                                             | 65  | 659  | 3.89E-02 |
| GO:0016772 | molecular_function | transferase activity, transferring phosphorus-containing groups                                | 127 | 1483 | 4.57E-02 |

---

392

393

394 **Supplementary Table 22. Summary of the data source and heterozygosity rate of**  
 395 **7 species.**

| Species              | Data source | Accession number | Total base (G) | Mapping depth (×) | Heterozygosity (%) |
|----------------------|-------------|------------------|----------------|-------------------|--------------------|
| <i>A. trichopoda</i> | NCBI        | SRR954305        | 64.7           | 55.5              | 0.18               |
|                      |             | SRR954306        |                |                   |                    |
|                      |             | SRR954307        |                |                   |                    |
| <i>E. ferox</i>      | -           | -                | 47.3           | 61.8              | 0.02               |
|                      | -           | -                | 137.4          | 148               | 0.07               |
| <i>P. equestris</i>  | NCBI        | SRR5809592       | 121.4          | 61.5              | 0.84               |
| <i>L. chinense</i>   | NCBI        | SRR6876702       | 27.9           | 13.7              | 0.30               |
| <i>C. kanehirae</i>  | NCBI        | SRR7416916       | 103.1          | 57.3              | 0.46               |
| <i>C. demersum</i>   | -           | -                | 46.4           | 45.8              | 0.62               |
| <i>V. vinifera</i>   | NCBI        | SRR8506855       | 30.1           | 48.19             | 0.93               |

396

397

398 **Supplementary References**

- 399 1 De Bie, T., Cristianini, N., Demuth, J. P. & Hahn, M. W. CAFE: a computational tool for the  
400 study of gene family evolution. *Bioinformatics* **22**, 1269-1271,  
401 doi:10.1093/bioinformatics/btl097 (2006).
- 402 2 Sayyari, E. & Mirarab, S. Testing for Polytomies in Phylogenetic Species Trees Using Quartet  
403 Frequencies. *Genes (Basel)* **9**, doi:10.3390/genes9030132 (2018).
- 404 3 Chaw, S.-M. *et al.* Stout camphor tree genome fills gaps in understanding of flowering plant  
405 genome evolution. *Nature plants* **5**, 63 (2019).
- 406 4 Chen, J. *et al.* Liriodendron genome sheds light on angiosperm phylogeny and species–pair  
407 differentiation. *Nature plants* **5**, 18 (2019).
- 408 5 Rendon-Anaya, M. *et al.* The avocado genome informs deep angiosperm phylogeny, highlights  
409 introgressive hybridization, and reveals pathogen-influenced gene space adaptation. *Proc Natl  
410 Acad Sci U S A* **116**, 17081-17089, doi:10.1073/pnas.1822129116 (2019).
- 411 6 Hu, L. S. *et al.* The chromosome-scale reference genome of black pepper provides insight into  
412 piperine biosynthesis. *Nature Communications* **10**, doi:ARTN 470210.1038/s41467-019-  
413 12607-6 (2019).
- 414 7 Solis-Lemus, C., Bastide, P. & Ane, C. PhyloNetworks: A Package for Phylogenetic Networks.  
415 *Mol Biol Evol* **34**, 3292-3298, doi:10.1093/molbev/msx235 (2017).
- 416 8 Wang, K. *et al.* Incomplete lineage sorting rather than hybridization explains the inconsistent  
417 phylogeny of the wisent. *Communications biology* **1**, 169 (2018).
- 418 9 Estep, M. C. *et al.* Allopolyploidy, diversification, and the Miocene grassland expansion. *Proc  
419 Natl Acad Sci U S A* **111**, 15149-15154, doi:10.1073/pnas.1404177111 (2014).
- 420 10 Wu, S., Han, B. & Jiao, Y. Genetic Contribution of Paleopolyploidy to Adaptive Evolution in  
421 Angiosperms. *Mol Plant*, doi:10.1016/j.molp.2019.10.012 (2019).
- 422 11 Fawcett, J. A., Maere, S. & Van de Peer, Y. Plants with double genomes might have had a better  
423 chance to survive the Cretaceous-Tertiary extinction event. *P Natl Acad Sci USA* **106**, 5737-  
424 5742, doi:10.1073/pnas.0900906106 (2009).
- 425 12 Clark, J. W. & Donoghue, P. C. J. Whole-Genome Duplication and Plant Macroevolution.  
426 *Trends Plant Sci* **23**, 933-945, doi:10.1016/j.tplants.2018.07.006 (2018).
- 427 13 Chase, M. W. *et al.* An update of the Angiosperm Phylogeny Group classification for the orders  
428 and families of flowering plants: APG IV. *Botanical Journal of the Linnean Society* **181**, 1-20  
429 (2016).
- 430 14 Moore, M. J., Bell, C. D., Soltis, P. S. & Soltis, D. E. Using plastid genome-scale data to resolve  
431 enigmatic relationships among basal angiosperms. *Proceedings of the National Academy of  
432 Sciences* **104**, 19363-19368 (2007).
- 433 15 Moore, M. J., Soltis, P. S., Bell, C. D., Burleigh, J. G. & Soltis, D. E. Phylogenetic analysis of  
434 83 plastid genes further resolves the early diversification of eudicots. *P Natl Acad Sci USA* **107**,  
435 4623-4628, doi:10.1073/pnas.0907801107 (2010).
- 436 16 Moore, M. J. *et al.* Phylogenetic Analysis of the Plastid Inverted Repeat for 244 Species:  
437 Insights into Deeper-Level Angiosperm Relationships from a Long, Slowly Evolving Sequence  
438 Region. *Int J Plant Sci* **172**, 541-558, doi:10.1086/658923 (2011).
- 439 17 Yin-Long, Q. *et al.* Angiosperm phylogeny inferred from sequences of four mitochondrial genes.  
440 *Journal of Systematics and Evolution* **48**, 391-425 (2010).

- 441 18 Endress, P. K. & Doyle, J. A. Reconstructing the ancestral angiosperm flower and its initial  
442 specializations. *American Journal of Botany* **96**, 22-66 (2009).
- 443 19 Zhang, N., Zeng, L., Shan, H. & Ma, H. Highly conserved low-copy nuclear genes as effective  
444 markers for phylogenetic analyses in angiosperms. *New Phytologist* **195**, 923-937 (2012).
- 445 20 Barkman, T. J. *et al.* Independent and combined analyses of sequences from all three genomic  
446 compartments converge on the root of flowering plant phylogeny. *P Natl Acad Sci USA* **97**,  
447 13166-13171, doi:DOI 10.1073/pnas.220427497 (2000).
- 448 21 Qiu, Y. L. *et al.* Phylogenetic analyses of basal angiosperms based on nine plastid, mitochondrial,  
449 and nuclear genes. *Int J Plant Sci* **166**, 815-842, doi:Doi 10.1086/431800 (2005).
- 450 22 Qiu, Y.-L. *et al.* The earliest angiosperms: evidence from mitochondrial, plastid and nuclear  
451 genomes. *Nature* **402**, 404 (1999).
- 452 23 Zanis, M. J., Soltis, D. E., Soltis, P. S., Mathews, S. & Donoghue, M. J. The root of the  
453 angiosperms revisited. *Proc Natl Acad Sci U S A* **99**, 6848-6853, doi:10.1073/pnas.092136399  
454 (2002).
- 455 24 Hilu, K. W. *et al.* Angiosperm phylogeny based on matK sequence information. *American*  
456 *Journal of Botany* **90**, 1758-1776, doi:DOI 10.3732/ajb.90.12.1758 (2003).
- 457 25 Qiu, Y. L. *et al.* Reconstructing the basal angiosperm phylogeny: evaluating information content  
458 of mitochondrial genes. *Taxon* **55**, 837-856, doi:Doi 10.2307/25065680 (2006).
- 459 26 Goremykin, V. V. *et al.* The Evolutionary Root of Flowering Plants. *Syst Biol* **62**, 50-61,  
460 doi:10.1093/sysbio/sys070 (2013).
- 461
